# Supplementary material for: A red-fleshed apple rich in anthocyanins improves endothelial function, reduces inflammation, and modulates the immune system in hypercholesterolemic subjects: the AppleCOR study
Source: Royal Society of Chemistry journal article supplement (doi:10.1039/d3fo05114e), 2024-01-01
Supplement: d3fo05114e4.pdf [file d3fo05114e4.pdf]

**Supplemental Table 30.** The 20 most relevant pathways sorted by p-value for RFA intervention.

| Top-level pathway           | Pathway name                                                                                                                | Reactome Entities |          |          |       | Reactions |          | Gene          |
|-----------------------------|-----------------------------------------------------------------------------------------------------------------------------|-------------------|----------|----------|-------|-----------|----------|---------------|
|                             |                                                                                                                             | found             | ratio    | p-value  | FDR*  | found     | ratio    |               |
| Immune System               | Regulation of Complement cascade                                                                                            | 3 / 231           | 0.012    | 3.58e-04 | 0.017 | 17 / 42   | 0.003    | C4A, SERPING1 |
| Immune System               | Activation of C3 and C5                                                                                                     | 2 / 45            | 0.002    | 3.61e-04 | 0.017 | 3 / 4     | 2.69e-04 | C4A           |
| Immune System               | Complement cascade                                                                                                          | 3 / 240           | 0.013    | 4.01e-04 | 0.017 | 23 / 72   | 0.005    | C4A, SERPING1 |
| Disease                     | Defective SERPING1 causes hereditary angioedema                                                                             | 1 / 3             | 1.57e-04 | 0.002    | 0.05  | 3 / 3     | 2.02e-04 | SERPING1      |
| Metabolism of proteins      | Post-translational protein phosphorylation                                                                                  | 2 / 107           | 0.006    | 0.002    | 0.05  | 1 / 1     | 6.72e-05 | C4A, FGA      |
| Hemostasis                  | Formation of Fibrin Clot (Clotting Cascade)                                                                                 | 2 / 135           | 0.007    | 0.003    | 0.059 | 7 / 61    | 0.004    | FGA, SERPING1 |
| Immune System               | Initial triggering of complement                                                                                            | 2 / 138           | 0.007    | 0.003    | 0.059 | 3 / 21    | 0.001    | C4A           |
| Hemostasis                  | Platelet degranulation                                                                                                      | 2 / 177           | 0.009    | 0.005    | 0.08  | 1 / 11    | 7.39e-04 | FGA, SERPING1 |
| Hemostasis                  | Response to elevated platelet cytosolic Ca <sup>2+</sup>                                                                    | 2 / 232           | 0.012    | 0.009    | 0.115 | 1 / 14    | 9.40e-04 | FGA, SERPING1 |
| Disease                     | Regulation of Insulin-like Growth Factor (IGF) transport and uptake by Insulin-like Growth Factor Binding Proteins (IGFBPs) | 2 / 254           | 0.013    | 0.011    | 0.115 | 1 / 14    | 9.40e-04 | C4A, FGA      |
| Metabolism of RNA           | mRNA decay by 3' to 5' exoribonuclease                                                                                      | 1 / 19            | 9.95e-04 | 0.012    | 0.115 | 1 / 3     | 2.02e-04 | EXOSC3        |
| Disease                     | Defects of contact activation system (CAS) and kallikrein/kinin system (KKS)                                                | 1 / 20            | 0.001    | 0.012    | 0.115 | 3 / 18    | 0.001    | SERPING1      |
| Transport of small molecule | HDL assembly                                                                                                                | 1 / 21            | 0.001    | 0.013    | 0.115 | 3 / 9     | 6.05e-04 | FGA           |
| Transport of small molecule | HDL clearance                                                                                                               | 1 / 23            | 0.001    | 0.014    | 0.115 | 1 / 5     | 3.36e-04 | FGA           |

**Supplemental Table 30.** The 20 most relevant pathways sorted by p-value for RFA intervention.

|                     |                                                           |        |       |       |       |        |          |          |
|---------------------|-----------------------------------------------------------|--------|-------|-------|-------|--------|----------|----------|
| Disease             | Diseases of hemostasis                                    | 1 / 23 | 0.001 | 0.014 | 0.115 | 3 / 23 | 0.002    | SERPING1 |
| Singal Transduction | IRAK4 deficiency (TLR2/4)                                 | 1 / 29 | 0.002 | 0.018 | 0.122 | 2 / 2  | 1.34e-04 | FGA      |
| Singal Transduction | GRB2:SOS provides linkage to MAPK signaling for Integrins | 1 / 36 | 0.002 | 0.022 | 0.122 | 2 / 2  | 1.34e-04 | FGA      |
| Disease             | Signaling by high-kinase activity BRAF mutants            | 1 / 37 | 0.002 | 0.023 | 0.122 | 4 / 6  | 4.03e-04 | FGA      |
| Disease             | MyD88 deficiency (TLR2/4)                                 | 1 / 39 | 0.002 | 0.024 | 0.122 | 2 / 2  | 1.34e-04 | FGA      |
| Singal Transduction | MAP2K and MAPK activation                                 | 1 / 41 | 0.002 | 0.025 | 0.122 | 8 / 12 | 8.06e-04 | FGA      |
