# Supplementary material for: A red-fleshed apple rich in anthocyanins improves endothelial function, reduces inflammation, and modulates the immune system in hypercholesterolemic subjects: the AppleCOR study
Source: Royal Society of Chemistry journal article supplement (doi:10.1039/d3fo05114e), 2024-01-01
Supplement: d3fo05114e5.pdf [file d3fo05114e5.pdf]

**Supplemental Table 31.** The 20 most relevant pathways sorted by p-value for WFA intervention.

| Top level pathway      | Pathway name                                                                                                                | Reactome Entities |       |          |          | Reactions |          | Gene                                    |
|------------------------|-----------------------------------------------------------------------------------------------------------------------------|-------------------|-------|----------|----------|-----------|----------|-----------------------------------------|
|                        |                                                                                                                             | found             | ratio | p-value  | FDR *    | found     | ratio    |                                         |
| Hemostasis             | Formation of Fibrin Clot (Clotting Cascade)                                                                                 | 7 / 135           | 0.007 | 9.39e-11 | 2.33e-08 | 32 / 61   | 0.004    | F2, KNG1, FGB, PROS1, FGG, SERPINC1     |
| Hemostasis             | Intrinsic Pathway of Fibrin Clot Formation                                                                                  | 5 / 51            | 0.003 | 2.66e-09 | 3.30e-07 | 13 / 24   | 0.002    | F2, PROS1, KNG1, SERPINC1               |
| Metabolism of proteins | Regulation of Insulin-like Growth Factor (IGF) transport and uptake by Insulin-like Growth Factor Binding Proteins (IGFBPs) | 7 / 254           | 0.013 | 7.25e-09 | 5.95e-07 | 3 / 14    | 9.40e-04 | C4A, FGG, SERPINC1, CP, KNG1, F2, PLG   |
| Hemostasis             | Common Pathway of Fibrin Clot Formation                                                                                     | 5 / 92            | 0.005 | 4.94e-08 | 3.07e-06 | 19 / 29   | 0.002    | F2, PROS1, FGB, SERPINC1, FGG           |
| Metabolism of proteins | Post-translational protein phosphorylation                                                                                  | 5 / 107           | 0.006 | 1.04e-07 | 5.10e-06 | 1 / 1     | 6.72e-05 | C4A, KNG1, CP, SERPINC1, FGG            |
| Immune System          | Regulation of Complement cascade                                                                                            | 6 / 231           | 0.012 | 1.45e-07 | 5.95e-06 | 20 / 42   | 0.003    | C1R, LRG1, C4A, PROS1, F2               |
| Immune System          | Complement cascade                                                                                                          | 6 / 240           | 0.013 | 1.81e-07 | 6.35e-06 | 29 / 72   | 0.005    | C1R, LRG1, C4A, PROS1, F2               |
| Hemostasis             | Platelet degranulation                                                                                                      | 5 / 177           | 0.009 | 1.23e-06 | 3.81e-05 | 1 / 11    | 7.39e-04 | FGB, PLG, FGG, PROS1, KNG1              |
| Hemostasis             | Response to elevated platelet cytosolic Ca <sup>2+</sup>                                                                    | 5 / 232           | 0.012 | 4.57e-06 | 1.23e-04 | 1 / 14    | 9.40e-04 | FGB, PLG, FGG, PROS1, KNG1              |
| Immune System          | Innate Immune System                                                                                                        | 11 / 3,145        | 0.165 | 1.67e-04 | 0.004    | 52 / 738  | 0.05     | C1R, FGB, LRG1, C4A, FGG, PROS1, F2, HP |
| Hemostasis             | Platelet activation, signaling and aggregation                                                                              | 6 / 822           | 0.043 | 1.97e-04 | 0.004    | 19 / 119  | 0.008    | F2, KNG1, FGB, PLG, FGG, PROS1          |

**Supplemental Table 31.** The 20 most relevant pathways sorted by p-value for WFA intervention.

|                        |                                                                                                          |           |       |          |       |          |          |                                                  |
|------------------------|----------------------------------------------------------------------------------------------------------|-----------|-------|----------|-------|----------|----------|--------------------------------------------------|
| Hemostasis             | Hemostasis                                                                                               | 9 / 2,272 | 0.119 | 3.63e-04 | 0.007 | 68 / 342 | 0.023    | F2, JCHAIN, PROS1, FGB, KNG1, SERPINC1, FGG, PLG |
| Metabolism of proteins | Transport of gamma-carboxylated protein precursors from the endoplasmic reticulum to the Golgi apparatus | 2 / 26    | 0.001 | 3.82e-04 | 0.007 | 2 / 9    | 6.05e-04 | F2, PROS1                                        |
| Metabolism of proteins | Gamma-carboxylation of protein precursors                                                                | 2 / 28    | 0.001 | 4.43e-04 | 0.007 | 2 / 9    | 6.05e-04 | F2, PROS1                                        |
| Immune System          | Initial triggering of complement                                                                         | 3 / 138   | 0.007 | 4.55e-04 | 0.007 | 6 / 21   | 0.001    | C1R, C4A                                         |
| Disease                | IRAK4 deficiency (TLR2/4)                                                                                | 2 / 29    | 0.002 | 4.75e-04 | 0.007 | 2 / 2    | 1.34e-04 | FGB, FGG                                         |
| Metabolism of proteins | Removal of aminoterminal propeptides from gamma-carboxylated proteins                                    | 2 / 35    | 0.002 | 6.89e-04 | 0.008 | 2 / 9    | 6.05e-04 | F2, PROS1                                        |
| Signal Transduction    | GRB2:SOS provides linkage to MAPK signaling for Integrins                                                | 2 / 36    | 0.002 | 7.28e-04 | 0.008 | 2 / 2    | 1.34e-04 | FGB, FGG                                         |
| Disease                | Signaling by high-kinase activity BRAF mutants                                                           | 2 / 37    | 0.002 | 7.69e-04 | 0.008 | 4 / 6    |          | FGB, FGG                                         |
| Metabolism of proteins | Gamma-carboxylation, transport, and                                                                      | 2 / 37    | 0.002 | 7.69e-04 | 0.008 | 6 / 27   | 0.002    | F2, PROS1                                        |

**Supplemental Table 31.** The 20 most relevant pathways sorted by p-value for WFA intervention.

|  |                                           |  |  |  |  |  |  |  |  |
|--|-------------------------------------------|--|--|--|--|--|--|--|--|
|  | amino-terminal<br>cleavage of<br>proteins |  |  |  |  |  |  |  |  |
|--|-------------------------------------------|--|--|--|--|--|--|--|--|
