# Supplementary material for: A red-fleshed apple rich in anthocyanins improves endothelial function, reduces inflammation, and modulates the immune system in hypercholesterolemic subjects: the AppleCOR study
Source: Royal Society of Chemistry journal article supplement (doi:10.1039/d3fo05114e), 2024-01-01
Supplement: d3fo05114e6.pdf [file d3fo05114e6.pdf]

**Supplemental Table 32.** The 20 most relevant pathways sorted by p-value for AI intervention.

| Top-level pathway      | Pathway name                                                                                                                | Reactome Entities |          |          |       | Reactions |          | Gene       |
|------------------------|-----------------------------------------------------------------------------------------------------------------------------|-------------------|----------|----------|-------|-----------|----------|------------|
|                        |                                                                                                                             | found             | ratio    | p-value  | FDR*  | found     | ratio    |            |
| Immune System          | Initial triggering of complement                                                                                            | 3 / 138           | 0.007    | 7.90e-05 | 0.009 | 6 / 21    | 0.001    | C4A, IGLL1 |
| Immune System          | Regulation of Complement cascade                                                                                            | 3 / 231           | 0.012    | 3.58e-04 | 0.011 | 17 / 42   | 0.003    | C4A, IGLL1 |
| Immune System          | Activation of C3 and C5                                                                                                     | 2 / 45            | 0.002    | 3.61e-04 | 0.011 | 3 / 4     | 2.69e-04 | C4A        |
| Immune System          | Complement cascade                                                                                                          | 3 / 240           | 0.013    | 4.01e-04 | 0.011 | 26 / 72   | 0.005    | C4A, IGLL1 |
| Metabolism of proteins | Post-translational protein phosphorylation                                                                                  | 2 / 107           | 0.006    | 0.002    | 0.044 | 1 / 1     | 6.72e-05 | AHSG, C4A  |
| Development Biology    | Formation of the cornified envelope                                                                                         | 2 / 218           | 0.011    | 0.008    | 0.143 | 8 / 27    | 0.002    | KRT80      |
| Metabolism of proteins | Regulation of Insulin-like Growth Factor (IGF) transport and uptake by Insulin-like Growth Factor Binding Proteins (IGFBPs) | 2 / 254           | 0.013    | 0.011    | 0.154 | 1 / 14    | 9.40e-04 | AHSG, C4A  |
| Metabolism of RNA      | mRNA decay by 3' to 5'exoribonuclease                                                                                       | 1 / 19            | 9.95e-04 | 0.012    | 0.154 | 1 / 3     | 2.02e-04 | EXOSC3     |
| Gene expression        | RUNX2 regulates genes involved in differentiation of myeloid cells                                                          | 1 / 23            | 0.001    | 0.014    | 0.164 | 1 / 2     | 1.34e-04 | AHSG       |
| Development Biology    | Keratinization                                                                                                              | 2 / 303           | 0.016    | 0.015    | 0.164 | 15 / 34   | 0.002    | KRT80      |
| DNA replication        | Unwinding of                                                                                                                | 1 / 47            | 0.002    | 0.029    | 0.222 | 1 / 4     | 2.69e-   | KT80       |

**Supplemental Table 32.** The 20 most relevant pathways sorted by p-value for AI intervention.

|                              |                                                                                     |         |       |       |       |        |          |       |
|------------------------------|-------------------------------------------------------------------------------------|---------|-------|-------|-------|--------|----------|-------|
|                              | DNA                                                                                 |         |       |       |       |        | 04       |       |
| Development Biology          | NCAM1 interactions                                                                  | 1 / 69  | 0.004 | 0.042 | 0.222 | 1 / 10 | 6.72e-04 | AZGP1 |
| DNA replication              | DNA strand elongation                                                               | 1 / 71  | 0.004 | 0.044 | 0.222 | 1 / 15 | 0.001    | KRT80 |
| gene expression              | RUNX1 regulates transcription of genes involved in differentiation of myeloid cells | 1 / 74  | 0.004 | 0.046 | 0.222 | 1 / 7  | 4.70e-04 | AHSG  |
| Immune System                | Classical antibody-mediated complement activation                                   | 1 / 95  | 0.005 | 0.058 | 0.222 | 2 / 2  | 1.34e-04 | IgLL1 |
| Transport of small molecules | Miscellaneous transport and binding events                                          | 1 / 100 | 0.005 | 0.061 | 0.222 | 1 / 13 | 8.73e-04 | AZGP1 |
| Immune System                | Creation of C4 and C2 activators                                                    | 1 / 103 | 0.005 | 0.063 | 0.222 | 2 / 8  | 5.37e-04 | IgLL1 |
| Vesicle-mediated transport   | Scavenging of heme from plasma                                                      | 1 / 115 | 0.006 | 0.07  | 0.222 | 1 / 12 | 8.06e-04 | IgLL1 |
| Immune System                | FCERI mediated Ca <sup>2+</sup> mobilization                                        | 1 / 118 | 0.006 | 0.072 | 0.222 | 2 / 11 | 7.39e-04 | IgLL1 |
| Immune System                | FCGR activation                                                                     | 1 / 123 | 0.006 | 0.075 | 0.222 | 6 / 6  | 4.03e-04 | IgLL1 |
