# Supplementary material for: A red-fleshed apple rich in anthocyanins improves endothelial function, reduces inflammation, and modulates the immune system in hypercholesterolemic subjects: the AppleCOR study
Source: Royal Society of Chemistry journal article supplement (doi:10.1039/d3fo05114e), 2024-01-01
Supplement: d3fo05114e7.pdf [file d3fo05114e7.pdf]

Supplemental Table 20. Changes in Oxidative Stress markers after 6 weeks of treatment

| Variable                        | Treatment     |                       |              |                       |               |                       | Changes among treatments |              |                        |       |                        |       |
|---------------------------------|---------------|-----------------------|--------------|-----------------------|---------------|-----------------------|--------------------------|--------------|------------------------|-------|------------------------|-------|
|                                 | WFA<br>(n=37) |                       | AI<br>(n=38) |                       | RFA<br>(n=32) |                       | AI vs<br>WFA             |              | RFA vs WFA             |       | RFA vs AI              |       |
|                                 | Post-int      | Change                | Post-int     | Change                | Post-int      | Change                | Mean<br>(95%CI)          | P            | Mean<br>(95%CI)        | P     | Mean<br>(95%CI)        | P     |
| <i>Oxidative stress markers</i> |               |                       |              |                       |               |                       |                          |              |                        |       |                        |       |
| OxLDL, U/L                      | 72 ± 25       | 0.812<br>(-4.4;6.0)   | 69 ± 23      | -0.551<br>(-5.6; 4.5) | 67 ± 33       | 3.26<br>(-2.4; 8.9)   | -1.36<br>(-8.6;5.9)      | 0.710        | 2.45<br>(-5.4;10)      | 0.539 | 3.81<br>(-3.7;11)      | 0.319 |
| OxLDL adjusted,<br>U/cg of LDL  | 0.51 ± 0.13   | 0.015<br>(-0.02;0.05) | 0.51 ± 0.14  | 0.021<br>(-0.01;0.05) | 0.47 ± 0.11   | 0.012<br>(-0.02;0.05) | 0.006<br>(-0.04;0.05)    | 0.799        | -0.003<br>(-0.05;0.05) | 0.917 | -0.009<br>(-0.06;0.04) | 0.726 |
| <i>PON1 mass, mg/dL</i>         |               |                       |              |                       |               |                       |                          |              |                        |       |                        |       |
| Total                           | 175 ± 40      | 5.83<br>(-3.3; 15)    | 193 ± 50     | -3.09<br>(-12; 5.8)   | 173 ± 33      | -2.95<br>(-13;6.9)    | -8.92<br>(-18;8.6)       | 0.172        | -7.97<br>(-22;3.9)     | 0.259 | -8.79<br>(-22;4.9)     | 0.207 |
| Men<br>(n=47)                   | 174 ± 34      | 9.45<br>(-7.4; 26)    | 210 ± 57     | 8.53<br>(-5.4; 22)    | 169 ± 39      | 2.16<br>(-13;17)      | -0.920<br>(-23;31)       | 0.934        | -7.29<br>(-29;15)      | 0.509 | -6.37<br>(-27;14)      | 0.543 |
| Women                           | 175 ± 43      | 1.89                  | 177 ± 37     | <b>-14.8</b>          | 176 ± 27      | -4.51                 | <b>-16.7</b>             | <b>0.039</b> | -6.41                  | 0.480 | 10.3                   | 0.262 |

|                                |             |               |             |                   |             |                      |                    |       |                      |              |                     |              |
|--------------------------------|-------------|---------------|-------------|-------------------|-------------|----------------------|--------------------|-------|----------------------|--------------|---------------------|--------------|
| (n=60)                         |             | (-8.8; 12)    |             | <b>(-27;-3.0)</b> |             | (-18; 9.2)           | <b>(-33;-0.83)</b> |       | (-24;12)             |              | (-7.9;28)           |              |
| PON raw, U/L                   | 2.43 ± 0.21 | -0.010        | 2.43 ± 0.23 | -0.018            | 2.38 ± 0.18 | <b>0.048</b>         | -0.008             | 0.730 | <b>0.058</b>         | <b>0.039</b> | <b>0.066</b>        | <b>0.022</b> |
| (log)                          |             | (-0.04; 0.02) |             | (-0.05; 0.02)     |             | <b>(0.006; 0.09)</b> | (-0.05; 0.04)      |       | <b>(0.003; 0.11)</b> |              | <b>(0.01; 0.12)</b> |              |
| Arylest raw, U/L               | 107 ± 24    | -1.62         | 111 ± 24    | 2.91              | 113 ± 27    | -2.02                | 4.53               | 0.197 | 0.400                | 0.916        | -4.93               | 0.175        |
|                                |             | (-6.6; 3.3)   |             | (-1.8; 7.7)       |             | (-7.4; 3.3)          | (-2.4 ; 11)        |       | (-7.9; 7.1)          |              | (-12; 2.2)          |              |
| <b>PON specific, U/mg prot</b> |             |               |             |                   |             |                      |                    |       |                      |              |                     |              |
| Total                          | 1.79 ± 0.98 | -0.076        | 1.63 ± 0.81 | -0.007            | 1.48 ± 0.57 | 0.053                | 0.068              | 0.336 | 0.129                | 0.120        | 0.060               | 0.439        |
|                                |             | (-0.18; 0.03) |             | (-0.11; 0.09)     |             | (-0.06; 0.17)        | (-0.08; 0.22)      |       | (-0.03; 0.29)        |              | (-0.09; 0.21)       |              |
| Men                            | 1.62 ± 0.83 | -0.146        | 1.43 ± 0.88 | -0.087            | 1.52 ± 0.77 | -0.008               | 0.058              | 0.624 | 0.138                | 0.263        | 0.080               | 0.452        |
| (n=47)                         |             | (-0.33; 0.04) |             | (-0.23; 0.06)     |             | (-0.16; 0.15)        | (-0.18; 0.29)      |       | (-0.11; 0.38)        |              | (-0.13; 0.29)       |              |
| Women                          | 1.87 ± 1.07 | -0.029        | 1.83 ± 0.70 | 0.062             | 1.46 ± 0.87 | 106                  | 0.092              | 0.372 | 0.135                | 0.261        | 0.043               | 0.716        |
| (n=60)                         |             | (-0.17; 0.11) |             | (-0.09; 0.21)     |             | (-0.07; 0.28)        | (-0.11; 0.30)      |       | (-0.10; 0.37)        |              | (-0.19; 0.28)       |              |
| Arylest specific, U/mg prot    | 0.64 ± 0.23 | -0.015        | 0.62 ± 0.21 | 0.016             | 0.68 ± 0.23 | 0.005                | 0.031              | 0.312 | 0.020                | 0.547        | -0.011              | 0.728        |
|                                |             | (-0.06; 0.03) |             | (-0.03; 0.06)     |             | (-0.04; 0.05)        | (-0.03; 0.09)      |       | (-0.05; 0.09)        |              | (-0.07; 0.05)       |              |

Post-int, post-treatment values. Change, change from baseline. PON, paraoxonase; Arylest, arylesterase. Data expressed as mean ± standard deviation or mean (95% Confidence Interval, CI. ANCOVA Model adjusted by sex, age, difference of PUFA as percentage of energy intake, and baseline values. Significant differences depicted in **bold** and borderline ones in *italic bold*. When interaction with sex was significant, results were examined separately by sex
