# Supplementary material for: A red-fleshed apple rich in anthocyanins improves endothelial function, reduces inflammation, and modulates the immune system in hypercholesterolemic subjects: the AppleCOR study
Source: Royal Society of Chemistry journal article supplement (doi:10.1039/d3fo05114e), 2024-01-01
Supplement: d3fo05114e9.pdf [file d3fo05114e9.pdf]

A

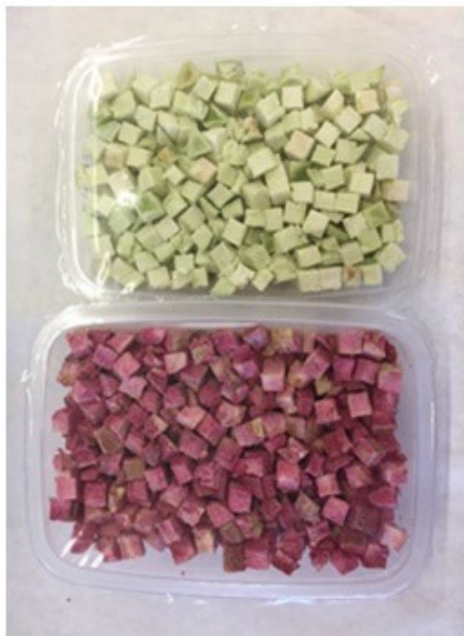

B

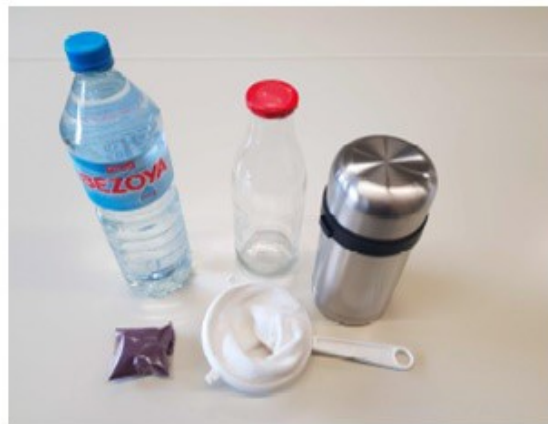

**Supplemental Figure 2.** Products administered to participants in the acute and sustained dietary interventions.
