# Supplementary material for: A red-fleshed apple rich in anthocyanins improves endothelial function, reduces inflammation, and modulates the immune system in hypercholesterolemic subjects: the AppleCOR study
Source: Royal Society of Chemistry journal article supplement (doi:10.1039/d3fo05114e), 2024-01-01
Supplement: d3fo05114e12.pdf [file d3fo05114e12.pdf]

**Supplemental Table 10. Postprandial Changes in Pulse Pressure at the Beginning and at the End of the study**

| Intervention    | Baseline (0h) | Change after intervention |              |              | P (trend) <sup>a,b</sup> |
|-----------------|---------------|---------------------------|--------------|--------------|--------------------------|
|                 |               | 2h                        | 4h           | 6h           |                          |
| <b>Baseline</b> |               |                           |              |              |                          |
| WFA (n=8)       | 47 (2.90)     | -0.50 (3.21)              | -3.75 (1.81) | -1.87 (1.80) | 0.248 <sup>b</sup>       |
| AI (n=9)        | 53 (2.96)     | -2.33 (1.55)              | -0.44 (1.66) | -2.44 (4.20) | 0.697 <sup>b</sup>       |
| RFA (n=12)      | 55 (3.13)     | -5.25 (2.15)              | -4.75 (5.14) | -1.92 (2.15) | 0.132 <sup>a</sup>       |
| <b>6 weeks</b>  |               |                           |              |              |                          |
| WFA (n=8)       | 43 (4.00)     | 3.87 (3.46)               | 1.62 (3.32)  | 2.37 (3.94)  | 0.544 <sup>a</sup>       |
| AI (n=9)        | 51(4.60)      | -0.11 (3.16)              | 0.44 (1.90)  | -0.33(2.65)  | 0.834 <sup>a</sup>       |
| RFA (n=9)       | 49 (4.68)     | -1.11 (4.50)              | 1.22 (2.60)  | 2.33 (3.10)  | 0.364 <sup>b</sup>       |

Data expressed as mean (standard error) in mmHg

Intra-treatment comparison by General Linear Model with Bonferroni correction. P for: <sup>a</sup> quadratic trend; <sup>b</sup>linear trend . No significant results were obtained

Inter-treatment comparisons by ANCOVA Model adjusted by age and sex. No differences were observed.
