# Supplementary material for: A red-fleshed apple rich in anthocyanins improves endothelial function, reduces inflammation, and modulates the immune system in hypercholesterolemic subjects: the AppleCOR study
Source: Royal Society of Chemistry journal article supplement (doi:10.1039/d3fo05114e), 2024-01-01
Supplement: d3fo05114e13.pdf [file d3fo05114e13.pdf]

| <b>Table 1.4 (cont)</b> |             |                                     |             |                                     |             |                                       |                       |       |                        |       |                        |       |
|-------------------------|-------------|-------------------------------------|-------------|-------------------------------------|-------------|---------------------------------------|-----------------------|-------|------------------------|-------|------------------------|-------|
| NEFA,<br><i>mmoL/L</i>  | 0.48 ± 0.30 | 0.027<br>(-0.07; 0.12)              | 0.47 ± 0.31 | 0.053<br>(-0.04; 0.15)              | 0.38 ± 0.13 | -0.056<br>(-0.15; 0.04)               | 0.026<br>(-0.11;0.12) | 0.699 | -0.083<br>(-0.22;0.05) | 0.227 | -0.109<br>(-0.24;0.02) | 0.108 |
| ApoA1,<br><i>mg/dL</i>  | 137 ± 18.1  | <b>-4.80</b><br><b>(-8.9;-0.67)</b> | 145 ± 23.0  | <b>-4.23</b><br><b>(-8.9;-0.37)</b> | 138 ± 20.4  | <b>-6.49</b><br><b>(-11;-2.3)</b>     | 0.372<br>(-5.4;6.2)   | 0.900 | -1.69<br>(-7.6;4.2)    | 0.573 | -2.06<br>(-7.9;3.8)    | 0.486 |
| ApoB,<br><i>mg/dL</i>   | 114 ± 19.5  | -0.424<br>(-4.2; 3.4)               | 118 ± 20.1  | -2.12<br>(-5.9; 1.6)                | 111 ± 21.2  | 0.140<br>(-3.8; 4.0)                  | -1.69<br>(-7.1;3.7)   | 0.536 | 0.564<br>(-4.9;6.0)    | 0.869 | 2.26<br>(-3.1;7.7)     | 0.410 |
| ApoA1/<br>ApoB ratio    | 1.24 ± 0.25 | -0.025<br>(-0.07; 0.02)             | 1.27 ± 0.32 | -0.025<br>(-0.07; 0.02)             | 1.28 ± 0.27 | <b>-0.057</b><br><b>(-0.10;-0.01)</b> | 0.001<br>(-0.06;0.06) | 0.982 | -0.032<br>(-0.1;0.03)  | 0.330 | -0.033<br>(-0.1;0.03)  | 0.312 |

Post-int, post-treatment values. Change, change from baseline. HDL, high density lipoproteins; LDL, low density lipoproteins; VLDL, very low density lipoproteins; TG, triglycerides; NEFA, non-esterified fatty acids; Apo, apolipoproteins. Data expressed as mean ± standard deviation or mean (95% Confidence Interval, CI). ANCOVA Model adjusted by sex and age. Significant differences depicted in **bold** and borderline ones in *italic bold*.
