# Supplementary material for: A red-fleshed apple rich in anthocyanins improves endothelial function, reduces inflammation, and modulates the immune system in hypercholesterolemic subjects: the AppleCOR study
Source: Royal Society of Chemistry journal article supplement (doi:10.1039/d3fo05114e), 2024-01-01
Supplement: d3fo05114e14.pdf [file d3fo05114e14.pdf]

Supplemental Table 12. Changes in Glucose, Insulin, and HOMA after 6 weeks of treatment

| Variable                 | Treatment     |                         |              |                                     |               |                         | Changes among treatments |       |                        |       |                       |       |
|--------------------------|---------------|-------------------------|--------------|-------------------------------------|---------------|-------------------------|--------------------------|-------|------------------------|-------|-----------------------|-------|
|                          | WFA<br>(n=41) |                         | AI<br>(n=40) |                                     | RFA<br>(n=43) |                         | AI vs<br>WFA             |       | RFA vs WFA             |       | RFA vs AI             |       |
|                          | Post-int      | Change                  | Post-int     | Change                              | Post-int      | Change                  | Mean<br>(95%CI)          | P     | Mean<br>(95%CI)        | P     | Mean<br>(95%CI)       | P     |
| Glucose,<br><i>mg/dL</i> | 88 ± 7.3      | -1.47<br>(-4.5;1.6)     | 89 ± 10.0    | <b>-4.36</b><br><b>(-7.4; -1.3)</b> | 86 ± 15.6     | -1.03<br>(-4.1; 2.1)    | -2.88<br>(-7.2;1.4)      | 0.187 | 0.440<br>(-3.9;4.8)    | 0.842 | 3.32<br>(-0.99;7.6)   | 0.130 |
| Insulin,<br><i>μU/mL</i> | 8.41 ± 5.6    | 0.084<br>(-1.6; 1.8)    | 7.06 ± 3.3   | 0.920<br>(-0.75; 2.6)               | 8.68 ± 10.5   | -0.368<br>(-2.1;1.4)    | 0.836<br>(-1.6;3.2)      | 0.495 | -0.452<br>(-2.9;2.0)   | 0.720 | -1.29<br>(-3.7;1.1)   | 0.299 |
| HOMA-<br>IR              | 1.84 ± 1.3    | -0.018<br>(-0.59; 0.55) | 1.88 ± 0.99  | 0.260<br>(-0.29;0.81)               | 2.03 ± 3.3    | -0.012<br>(-0.71; 0.47) | 0.279<br>(-0.52;1.1)     | 0.489 | -0.103<br>(-0.92;0.72) | 0.804 | -0.382<br>(-1.2;0.42) | 0.349 |

Post-int, post-treatment values. Change, change from baseline. Data expressed as mean ± standard deviation or mean (95% Confidence Interval, CI. ANCOVA Model adjusted by sex and age. Significant differences depicted in **bold** .
