# Supplementary material for: A red-fleshed apple rich in anthocyanins improves endothelial function, reduces inflammation, and modulates the immune system in hypercholesterolemic subjects: the AppleCOR study
Source: Royal Society of Chemistry journal article supplement (doi:10.1039/d3fo05114e), 2024-01-01
Supplement: d3fo05114e15.pdf [file d3fo05114e15.pdf]

Supplemental Table 21. Changes in Inflammatory markers (pg/mL) after 6 weeks of treatment

| Variable     | Treatment     |                                  |              |                                  |               |                                       | Changes among treatments |       |                                        |              |                        |              |
|--------------|---------------|----------------------------------|--------------|----------------------------------|---------------|---------------------------------------|--------------------------|-------|----------------------------------------|--------------|------------------------|--------------|
|              | WFA<br>(n=37) |                                  | AI<br>(n=38) |                                  | RFA<br>(n=32) |                                       | AI vs<br>WFA             |       | RFA vs WFA                             |              | RFA vs AI              |              |
|              | Post-int      | Change                           | Post-int     | Change                           | Post-int      | Change                                | Mean<br>(95%CI)          | P     | Mean<br>(95%CI)                        | P            | Mean<br>(95%CI)        | P            |
| IL-10 (log)  | 1.01 ± 0.31   | -0.008<br>(-0.07;0.05)           | 1.12 ± 0.37  | -0.010<br>(-0.07;0.05)           | 1.04 ± 0.34   | -0.015<br>(-0.08;0.05)                | -0.003<br>(-0.1;0.1)     | 0.955 | -0.007<br>(-0.1;0.08)                  | 0.873        | -0.005<br>(-0.1;0.08)  | 0.916        |
| IL-6 (log)   | 0.18 ± 0.45   | 0.034<br>(-0.08;0.144)           | 0.25 ± 0.55  | 0.009<br>(-0.10;0.12)            | 0.05 ± 0.51   | <b>-0.134</b><br><b>(-0.25;-0.02)</b> | -0.025<br>(-0.18;0.13)   | 0.752 | <b>-0.168</b><br><b>(-0.33; 0.003)</b> | <b>0.046</b> | -0.143<br>(-0.30;0.02) | <b>0.078</b> |
| TNF-alpha    | 5.03 ± 2.14   | 0.533<br>(-0.08;1.1)             | 5.14 ± 2.33  | 0.327<br>(-0.26; 0.92)           | 4.72 ± 2.42   | 0.128<br>(-0.53; 0.79)                | -0.206<br>(-1.1;0.65)    | 0.335 | -0.405<br>(-1.3;0.52)                  | 0.387        | -0.199<br>(-1.1;0.69)  | 0.657        |
| Endothelin-1 | 8.26 ± 4.84   | <b>2.40</b><br><b>(0.66;4.1)</b> | 9.19 ± 4.37  | <b>2.51</b><br><b>(0.81;4.2)</b> | 9.41 ± 5.25   | <b>3.68</b><br><b>(1.9;5.4)</b>       | 0.112<br>(-2.3;2.5)      | 0.927 | 1.28<br>(-1.3;3.8)                     | 0.319        | 1.17<br>(-1.3;3.6)     | 0.354        |

Post-int, post-treatment values. Change, change from baseline. IL, interleukine; TNF, tumor necrosis factor. Data expressed as mean ± standard deviation or mean (95% Confidence Interval, CI. ANCOVA Model adjusted by sex, age, difference of PUFA as percentage of energy intake, and baseline values. Significant differences depicted in **bold** and borderline ones in *italic bold*. When interaction with sex was significant, results were examined separately by sex
