# Supplementary material for: A red-fleshed apple rich in anthocyanins improves endothelial function, reduces inflammation, and modulates the immune system in hypercholesterolemic subjects: the AppleCOR study
Source: Royal Society of Chemistry journal article supplement (doi:10.1039/d3fo05114e), 2024-01-01
Supplement: d3fo05114e16.pdf [file d3fo05114e16.pdf]

Supplemental Table 22. Changes in inflammatory markers (pg/mL) after 6 weeks of treatment by gender

| Variable           | Treatment     |                        |              |                        |               |                                       | Changes among treatments |       |                                        |              |                        |              |
|--------------------|---------------|------------------------|--------------|------------------------|---------------|---------------------------------------|--------------------------|-------|----------------------------------------|--------------|------------------------|--------------|
|                    | WFA<br>(n=37) |                        | AI<br>(n=38) |                        | RFA<br>(n=32) |                                       | AI vs<br>WFA             |       | RFA vs WFA                             |              | RFA vs AI              |              |
|                    | Post-int      | Change                 | Post-int     | Change                 | Post-int      | Change                                | Mean<br>(95%CI)          | P     | Mean<br>(95%CI)                        | P            | Mean<br>(95%CI)        | P            |
| <i>IL-10 (log)</i> |               |                        |              |                        |               |                                       |                          |       |                                        |              |                        |              |
| All                | 1.01 ± 0.31   | -0.008<br>(-0.07;0.05) | 1.12 ± 0.37  | -0.010<br>(-0.07;0.05) | 1.04 ± 0.34   | -0.015<br>(-0.08;0.05)                | -0.003<br>(-0.10;0.10)   | 0.955 | -0.007<br>(-0.10;0.08)                 | 0.873        | -0.005<br>(-0.10;0.08) | 0.916        |
| Men (n=45)         | 0.93 ± 0.36   | 0.005<br>(-0.10;0.11)  | 1.14 ± 0.50  | -0.004<br>(-0.09;0.08) | 0.94 ± 0.36   | -0.081<br>(-0.17;0.01)                | -0.009<br>(-0.15;0.13)   | 0.901 | -0.085<br>(-0.23;0.06)                 | 0.229        | -0.077<br>(-0.20;0.05) | 0.221        |
| Women (n=62)       | 1.06 ± 0.28   | 0.006<br>(-0.07;0.08)  | 1.07 ± 0.18  | 0.003<br>(-0.08;0.09)  | 1.10 ± 0.32   | -0.016<br>(-0.11;0.08)                | -0.002<br>(-0.12;0.11)   | 0.965 | -0.022<br>(-0.15;0.11)                 | 0.733        | -0.020<br>(-0.15;0.11) | 0.765        |
| <i>IL-6 (log)</i>  |               |                        |              |                        |               |                                       |                          |       |                                        |              |                        |              |
| All                | 0.18 ± 0.45   | 0.034<br>(-0.08;0.14)  | 0.25 ± 0.55  | 0.009<br>(-0.10;0.12)  | 0.05 ± 0.51   | <b>-0.134</b><br><b>(-0.25;-0.02)</b> | -0.025<br>(-0.18;0.13)   | 0.752 | <b>-0.168</b><br><b>(-0.33; 0.003)</b> | <b>0.046</b> | -0.143<br>(-0.30;0.02) | <b>0.078</b> |
| Men (n=45)         | 0.13 ± 0.65   | 0.139<br>(-0.07;0.35)  | 0.27 ± 0.469 | -0.015<br>(-0.18;0.15) | 0.05 ± 0.47   | -0.160<br>(-0.33;0.02)                | -0.153<br>(-0.42;0.12)   | 0.259 | <b>-0.298</b><br><b>(-0.57;-0.02)</b>  | <b>0.033</b> | -0.145<br>(-0.39;0.10) | 0.232        |

**Table 3A (cont)**

|                     |             |                                  |             |                                  |             |                                  |                       |       |                        |       |                        |       |
|---------------------|-------------|----------------------------------|-------------|----------------------------------|-------------|----------------------------------|-----------------------|-------|------------------------|-------|------------------------|-------|
| Women (n=62)        | 0.16 ± 0.34 | 0.021<br>(-0.10;0.14)            | 0.30 ± 0.49 | 0.047<br>(-0.08;0.18)            | 0.16 ± 0.50 | -0.124<br>(-0.28;0.03)           | 0.026<br>(-0.15;0.20) | 0.765 | -0.145<br>(-0.35;0.06) | 0.155 | -0.171<br>(-0.37;0.03) | 0.099 |
| <i>TNF-alpha</i>    |             |                                  |             |                                  |             |                                  |                       |       |                        |       |                        |       |
| All                 | 5.03 ± 2.14 | 0.533<br>(-0.08;1.1)             | 5.14 ± 2.33 | 0.327<br>(-0.26; 0.92)           | 4.72 ± 2.42 | 0.128<br>(-0.53; 0.79)           | -0.206<br>(-1.1;0.65) | 0.335 | -0.405<br>(-1.3;0.52)  | 0.387 | -0.199<br>(-1.1;0.69)  | 0.657 |
| Men (n=45)          | 4.66 ± 1.80 | 0.504<br>(-0.32;1.3)             | 4.98 ± 2.80 | 0.062<br>(-0.58;0.71)            | 4.65 ± 2.05 | 0.046<br>(-0.66;0.75)            | -0.441<br>(-1.5;0.61) | 0.403 | -0.457<br>(-1.5;0.63)  | 0.400 | -0.016<br>(-0.97;0.94) | 0.973 |
| Women (n=62)        | 5.12 ± 2.18 | 0.695<br>(-0.15;1.5)             | 5.19 ± 1.67 | 0.503<br>(-0.44;1.4)             | 4.98 ± 2.52 | 0.059<br>(-1.0;1.1)              | -0.192<br>(-1.4;1.1)  | 0.761 | -0.636<br>(-2.1;0.80)  | 0.378 | -0.444<br>(-1.9;1.1)   | 0.541 |
| <i>Endothelin-1</i> |             |                                  |             |                                  |             |                                  |                       |       |                        |       |                        |       |
| All                 | 8.26 ± 4.84 | <b>2.40</b><br><b>(0.66;4.1)</b> | 9.19 ± 4.37 | <b>2.51</b><br><b>(0.81;4.2)</b> | 9.41 ± 5.25 | <b>3.68</b><br><b>(1.9;5.4)</b>  | 0.112<br>(-2.3;2.5)   | 0.927 | 1.28<br>(-1.3;3.8)     | 0.319 | 1.17<br>(-1.3;3.6)     | 0.354 |
| Men (n=45)          | 9.89 ± 5.25 | <b>4.02</b><br><b>(1.4;6.6)</b>  | 8.86 ± 2.76 | <b>2.46</b><br><b>(0.42;4.5)</b> | 8.96 ± 4.87 | <b>2.92</b><br><b>(0.67;5.2)</b> | -1.54<br>(-4.8;1.7)   | 0.346 | -1.08<br>(-4.6;2.4)    | 0.539 | 0.452<br>(-2.7;3.6)    | 0.770 |
| Women (n=62)        | 7.51 ± 4.10 | 1.55<br>(-0.49;3.6)              | 9.30 ± 5.02 | <b>3.25</b><br><b>(1.1;5.4)</b>  | 9.72 ± 4.73 | <b>4.00</b><br><b>(1.6;6.4)</b>  | 1.70<br>(-1.2;4.6)    | 0.252 | 2.44<br>(-0.86;5.7)    | 0.143 | 0.747<br>(-2.5;4.0)    | 0.650 |

Post-int, post-treatment values. Change, change from baseline. IL, interleukine; TNF, tumor necrosis factor. Data expressed as mean  $\pm$  standard deviation or mean (95% Confidence Interval, CI. ANCOVA Model adjusted by sex, age, difference of PUFA as percentage of energy intake, and baseline values. Significant differences depicted in **bold** and borderline ones in ***italic bold***. When interaction with sex was significant, results were examined separately by sex
