# Supplementary material for: A red-fleshed apple rich in anthocyanins improves endothelial function, reduces inflammation, and modulates the immune system in hypercholesterolemic subjects: the AppleCOR study
Source: Royal Society of Chemistry journal article supplement (doi:10.1039/d3fo05114e), 2024-01-01
Supplement: d3fo05114e17.pdf [file d3fo05114e17.pdf]

Supplemental Table 23. Changes in CRP after 6 weeks of treatment by gender

| Variable          | Treatment     |              |              |              |               |              | Changes among treatments                        |                                                 |                                                 |
|-------------------|---------------|--------------|--------------|--------------|---------------|--------------|-------------------------------------------------|-------------------------------------------------|-------------------------------------------------|
|                   | WFA<br>(n=40) |              | AI<br>(n=40) |              | RFA<br>(n=39) |              | AI vs<br>WFA                                    | RFA vs<br>WFA                                   | RFA vs<br>AI                                    |
|                   | Post-int      | Change       | Post-int     | Change       | Baseline      | Change       | Median<br>(25 <sup>th</sup> -75 <sup>th</sup> ) | Median<br>(25 <sup>th</sup> -75 <sup>th</sup> ) | Median<br>(25 <sup>th</sup> -75 <sup>th</sup> ) |
| <i>CRP, mg/dL</i> |               |              |              |              |               |              |                                                 |                                                 |                                                 |
| All               | 0.15          | 0.000        | 0.12         | -0.010       | 0.18          | -0.031       | 0.010                                           | -0.050                                          | -0.025                                          |
|                   | (0.06; 0.30)  | (-0.05;0.09) | (0.06; 0.26) | (-0.07;0.06) | (0.09;0.41)   | (-0.14;0.04) | (-0.14;0.21)                                    | (-0.26;0.07)                                    | (-0.25;0.11)                                    |
|                   |               | P=0.460      |              | P=0.948      |               | P=0.230      | P=0.365                                         | <b>0.035</b>                                    | P=0.202                                         |
| Men<br>(n=50)     | 0.19          | 0.008        | 0.12         | 0.030        | 0.13          | -0.020       | 0.022                                           | -0.028                                          | -0.010                                          |
|                   | (0.08; 0.38)  | (-0.05;0.13) | (0.06; 0.31) | (-0.05;0.21) | (0.06; 0.35)  | (-0.05;0.09) | (0.00;0.08)                                     | (-0.04;0.00)                                    | (-0.18;0.00)                                    |
|                   |               | P=0.071      |              | P=0.262      |               | P=0.959      | P=0.730                                         | P=0.341                                         | P=0.478                                         |
| Women<br>(n=69)   | 0.12          | 0.000        | 0.12         | -0.015       | 0.22          | -0.065       | -0.015                                          | -0.050                                          | -0.065                                          |
|                   | (0.05; 0.22)  | (-0.05;0.05) | (0.06; 0.23) | (-0.09;0.01) | (0.11; 0.38)  | (-0.17;0.01) | (-0.04;0.05)                                    | (-0.12;0.05)                                    | (-0.08;0.00)                                    |
|                   |               | P=0.974      |              | P=0.142      |               | P=0.073      | P=0.248                                         | <b><i>P=0.055</i></b>                           | P=0.449                                         |

CRP, high sensibility C reactive protein. AU, arbitrary units. Data expressed as median (25<sup>th</sup> -75<sup>th</sup> percentile). Wilcoxon and Mann Whitney tests. Significant differences depicted in **bold** and borderline ones in *italic bold*.
