# Supplementary material for: A red-fleshed apple rich in anthocyanins improves endothelial function, reduces inflammation, and modulates the immune system in hypercholesterolemic subjects: the AppleCOR study
Source: Royal Society of Chemistry journal article supplement (doi:10.1039/d3fo05114e), 2024-01-01
Supplement: d3fo05114e18.pdf [file d3fo05114e18.pdf]

**Supplemental Table 24. Postprandial Changes in C-Reactive P at the Beginning and at the End of the study**

| <b>Intervention</b> | <b>Baseline (0h)</b> | <b>2h</b>                 | <b>4h</b>                 | <b>6h</b>                 |
|---------------------|----------------------|---------------------------|---------------------------|---------------------------|
| <i>Baseline</i>     |                      |                           |                           |                           |
| <b>WFA (n=8)</b>    | 0.155 (0.09;0.19)    | <b>0.135 (0.07;0.21)*</b> | 0.140 (0.07;0.20)         | 0.160 (0.09;0.27)         |
| <b>AI (n=9)</b>     | 0.130 (0.04;0.38)    | 0.160 (0.04;0.39)         | 0.170 (0.04;0.37)         | 0.160 (0.04;0.36)         |
| <b>RFA (n=12)</b>   | 0.315 (0.08;0.75)    | 0.330 (0.08;0.53)         | <b>0.295 (0.08;0.68)*</b> | <b>0.150 (0.06;0.71)†</b> |
| <b>6 weeks</b>      |                      |                           |                           |                           |
| <b>WFA (n=8)</b>    | 0.150 (0.09;0.53)    | 0.155 (0.09;0.52)         | 0.155 (0.09;0.56)         | 0.165 (0.08;0.50)         |
| <b>AI (n=9)</b>     | 0.130 (0.07;0.33)    | 0.110 (0.07;0.39)         | 0.130 (0.07;0.44)         | 0.120 (0.07;0.39)         |
| <b>RFA (n=12)</b>   | 0.140 (0.04;0.51)    | 0.155 (0.04;0.41)         | 0.150 (0.03;0.51)         | 0.130 (0.03;0.4)          |

Data expressed as median (25<sup>th</sup>-75<sup>th</sup> percentile).

Intra-treatment comparison by Wilcoxon test. \* P < 0.1; †P<0.05 versus its baseline

Inter-treatment comparisons by Mann Whitney test. No differences were observed.
