# Supplementary material for: A red-fleshed apple rich in anthocyanins improves endothelial function, reduces inflammation, and modulates the immune system in hypercholesterolemic subjects: the AppleCOR study
Source: Royal Society of Chemistry journal article supplement (doi:10.1039/d3fo05114e), 2024-01-01
Supplement: d3fo05114e19.pdf [file d3fo05114e19.pdf]

Supplemental Table 25. Changes in Cell adhesion Molecules after 6 weeks of treatment

| Variable                              | Treatment          |                                |                      |                                 |                      |                                | Changes among treatments                                              |                       |                                                                       |          |                                                                       |                                                     |
|---------------------------------------|--------------------|--------------------------------|----------------------|---------------------------------|----------------------|--------------------------------|-----------------------------------------------------------------------|-----------------------|-----------------------------------------------------------------------|----------|-----------------------------------------------------------------------|-----------------------------------------------------|
|                                       | WFA<br>(n=36)      |                                | AI<br>(n=34)         |                                 | RFA<br>(n=31)        |                                | AI vs<br>WFA                                                          |                       | RFA vs WFA                                                            |          | RFA vs AI                                                             |                                                     |
|                                       | Post-int           | Change                         | Post-int             | Change                          | Post-int             | Change                         | Mean<br>(95%CI)                                                       | P                     | Mean<br>(95%CI)                                                       | P        | Mean<br>(95%CI)                                                       | P                                                   |
| VCAM-1, $\mu\text{g/mL}$<br>(log)     | 0.70 ± 0.40        | 0.070<br>(-0.04;0.18)          | 0.61 ± 0.32          | -0.074<br>(-0.16;0.03)          | 0.61 ± 0.19          | 0.032<br>(-0.08;0.15)          | -0.145<br>(-0.30;0.01)                                                | <b>0.064</b>          | -0.038<br>(-0.20; 0.12)                                               | 0.634    | 0.107<br>(-0.05;0.26)                                                 | 0.183                                               |
| P-Selectin, ng/mL                     | 88 ± 51            | 1.71<br>(-17;21)               | 83 ± 46              | -35.1<br>(-55; -15)             | 91 ± 33              | 2.14<br>(-18; 23)              | -36.8<br>(-64;-9.2)                                                   | <b>0.009</b>          | 0.427<br>(-28;29)                                                     | 0.976    | 37.2<br>(8.9; 66)                                                     | <b>0.011</b>                                        |
|                                       |                    |                                |                      |                                 |                      |                                | <b>Median<br/>(25<sup>th</sup> – 75<sup>th</sup><br/>percentile).</b> | <b>P</b>              | <b>Median<br/>(25<sup>th</sup> – 75<sup>th</sup><br/>percentile).</b> | <b>P</b> | <b>Median<br/>(25<sup>th</sup> – 75<sup>th</sup><br/>percentile).</b> | <b>P</b>                                            |
| <sup>a</sup> ICAM-1, $\mu\text{g/mL}$ | 0.167<br>(0.12-35) | 0.001<br>(-0.55;28)<br>P=0.871 | 0.138<br>(0.09;0.17) | -0.064<br>(-0.31;20)<br>P=0.023 | 0.153<br>(0.09;0.35) | 0.011<br>(-0.06;35)<br>P=0.184 | -0.063<br>(-8;0.24)                                                   | 0.109<br><b>0.088</b> | 0.010<br>(-7;49)                                                      | 0.367    | -0.053<br>(-0.15;-0.25)                                               | <b>0.017</b><br><br><b>0.010</b><br><br><b>four</b> |
|                                       |                    |                                |                      | <b>P=0.007 con<br/>four</b>     |                      |                                |                                                                       | <b>four</b>           |                                                                       |          |                                                                       | <b>four</b>                                         |

|                                       |             |              |             |                       |             |              |              |              |                       |
|---------------------------------------|-------------|--------------|-------------|-----------------------|-------------|--------------|--------------|--------------|-----------------------|
| <sup>a</sup> VCAM-1, $\mu\text{g/mL}$ | 0.605       | -0.031       | 0.539       | -0.115                | 0.554       | 0.029        | -0.084       | 0.060        | 0.144                 |
|                                       | (0.47-0.77) | (-0.18;0.22) | (0.46-0.72) | (-0.29;0.14)          | (0.46-0.68) | (-0.11;0.14) | (-0.11;0.06) | (-0.08;0.06) | (0.18;0.00)           |
|                                       |             | P=0.961      |             | <b><i>P=0.073</i></b> |             | P=0.586      | P=0.143      | P=0.742      | <b><i>P=0.088</i></b> |

Post-int, post-treatment values. Change, change from baseline. ICAM-1, intercellular adhesion molecule 1; VCAM-1, vascular cell adhesion molecule 1. Data expressed as mean  $\pm$  standard deviation, mean (95% Confidence Interval, CI) or <sup>a</sup>median (25<sup>th</sup> – 75<sup>th</sup> percentile). ANCOVA Model adjusted by sex and age, or <sup>a</sup>Wilcoxon and Man Whitney tests. Significant differences depicted in **bold** and borderline ones in ***italic bold***.
