# Supplementary material for: A red-fleshed apple rich in anthocyanins improves endothelial function, reduces inflammation, and modulates the immune system in hypercholesterolemic subjects: the AppleCOR study
Source: Royal Society of Chemistry journal article supplement (doi:10.1039/d3fo05114e), 2024-01-01
Supplement: d3fo05114e20.pdf [file d3fo05114e20.pdf]

**Supplemental Table 26. Postprandial Changes in Paraoxonase Markers at the Beginning and at the End of the study**

| Intervention                     | Baseline (0h) | Change after intervention |                              |                            | P (trend) <sup>a,b</sup> |
|----------------------------------|---------------|---------------------------|------------------------------|----------------------------|--------------------------|
|                                  |               | 2h                        | 4h                           | 6h                         |                          |
| <b><i>PON mass, mg/L</i></b>     |               |                           |                              |                            |                          |
| <i>Baseline</i>                  |               |                           |                              |                            |                          |
| WFA (n=7)                        | 155 (6.1)     | 18 (20)                   | 43 (26)                      | 6.8 (3.7)                  | 0.125 <sup>a</sup>       |
| AI (n=7)                         | 172 (11)      | -0.46 (6.8)               | <b>6.2 (7.0)<sup>^</sup></b> | 8.9 (8.1)                  | 0.225 <sup>b</sup>       |
| RFA (n=10)                       | 187 (13)      | -11 (14)                  | <b>-18 (9.9)<sup>¥</sup></b> | 15 (18)                    | 0.118 <sup>a</sup>       |
| <i>6 weeks</i>                   |               |                           |                              |                            |                          |
| WFA (n=7)                        | 161 (7.5)     | 16 (22)                   | 5.1 (15)                     | -13 (6.0)                  | 0.175 <sup>b</sup>       |
| AI (n=6)                         | 223 (21)      | -14 (24)                  | -12 (23)                     | -24 (20)                   | 0.296 <sup>b</sup>       |
| RFA (n=8)                        | 177 (11)      | 32 (26)                   | 26 (26)                      | <b>37 (30)<sup>^</sup></b> | 0.310 <sup>b</sup>       |
| <b><i>PON raw (log), U/L</i></b> |               |                           |                              |                            |                          |
| <i>Baseline</i>                  |               |                           |                              |                            |                          |
| WFA (n=7)                        | 2.31 (0.09)   | -0.01 (0.03)              | -0.003 (0.02)                | -0.01 (0.01)               | 0.396 <sup>b</sup>       |

**Table 2.15 (cont)**

|                |             |               |               |               |                    |
|----------------|-------------|---------------|---------------|---------------|--------------------|
| AI (n=7)       | 2.35 (0.10) | -0.003 (0.01) | -0.009 (0.01) | 0.001 (0.02)  | 0.428 <sup>a</sup> |
| RFA (n=10)     | 2.33 (0.07) | 0.01 (0.02)   | -0.004 (0.01) | -0.006 (0.01) | 0.339 <sup>b</sup> |
| <i>6 weeks</i> |             |               |               |               |                    |
| WFA (n=7)      | 2.25 (0.06) | 0.01 (0.03)   | -0.03(0.02)   | 0.01 (0.03)   | 0.152 <sup>b</sup> |
| AI (n=6)       | 2.35 (0.10) | -0.02 (0.02)  | -0.03 (0.03)  | -0.01 (0.01)  | 0.228 <sup>b</sup> |
| RFA (n=8)      | 2.34 (0.09) | -0.03 (0.04)  | 0.05 (0.09)   | -0.009 (0.03) | 0.609 <sup>b</sup> |

***PON specific (log), U/mg protein******Baseline***

|            |             |              |                                |              |                          |
|------------|-------------|--------------|--------------------------------|--------------|--------------------------|
| WFA (n=7)  | 0.12 (0.09) | -0.05 (0.06) | -0.08 (0.06)                   | -0.03 (0.01) | 0.112 <sup>b</sup>       |
| AI (n=7)   | 0.12 (0.08) | 0.001 (0.02) | -0.02(0.02)                    | -0.02(0.02)  | 0.295 <sup>b</sup>       |
| RFA (n=10) | 0.07 (0.06) | 0.04 (0.03)  | <b>0.04 (0.02)<sup>†</sup></b> | -0.04 (0.02) | <b>0.044<sup>a</sup></b> |

***6 weeks***

|           |             |              |              |             |                    |
|-----------|-------------|--------------|--------------|-------------|--------------------|
| WFA (n=7) | 0.04 (0.06) | -0.02 (0.07) | -0.04 (0.04) | 0.05 (0.04) | 0.127 <sup>a</sup> |
|-----------|-------------|--------------|--------------|-------------|--------------------|

**Table 2.15 (cont)**

|           |             |              |               |              |                    |
|-----------|-------------|--------------|---------------|--------------|--------------------|
| AI (n=6)  | 0.02 (0.10) | 0.002 (0.06) | -0.005 (0.06) | 0.03 (0.04)  | 0.493 <sup>b</sup> |
| RFA (n=8) | 0.09 (0.09) | -0.09 (0.06) | 0.03 (0.12)   | -0.07 (0.06) | 0.708 <sup>b</sup> |

***Arylesterase raw, U/L******Baseline***

|            |           |            |            |            |                    |
|------------|-----------|------------|------------|------------|--------------------|
| WFA (n=7)  | 93 (10)   | 3.5 (13)   | -4.3 (9.3) | -1.2 (7.4) | 0.604 <sup>b</sup> |
| AI (n=7)   | 116 (9.3) | -0.40 (10) | -3.7 (9.9) | -2.0 (3.0) | 0.339 <sup>b</sup> |
| RFA (n=10) | 120 (9.3) | -9.5 (7.5) | -6.1 (6.9) | 2.7 (3.4)  | 0.136 <sup>a</sup> |

***6 weeks***

|           |          |            |             |             |                    |
|-----------|----------|------------|-------------|-------------|--------------------|
| WFA (n=7) | 96 (14)  | 1.4 (10)   | -5.7 (6.7)  | -0.41 (2.6) | 0.335 <sup>b</sup> |
| AI (n=6)  | 116 (11) | -5.0 (7.4) | -0.88 (3.0) | -1.3 (4.9)  | 0.638 <sup>a</sup> |
| RFA (n=8) | 108 (12) | 0.15 (10)  | 4.7 (4.2)   | 2.4 (4.5)   | 0.394 <sup>b</sup> |

***Arylesterase specific, U/mg protein******Baseline***

**Table 2.15 (cont)**

|                |             |               |                                |              |                                 |
|----------------|-------------|---------------|--------------------------------|--------------|---------------------------------|
| WFA (n=7)      | 0.60 (0.07) | -0.02 (0.08)  | -0.10 (0.08)                   | -0.03 (0.04) | 0.431 <sup>b</sup>              |
| AI (n=7)       | 0.69 (0.08) | -0.003 (0.07) | -0.06 (0.06)                   | -0.05 (0.02) | <b><i>0.088<sup>b</sup></i></b> |
| RFA (n=10)     | 0.67 (0.07) | -0.009 (0.08) | <b>0.04 (0.06)<sup>†</sup></b> | -0.02 (0.07) | 0.672 <sup>a</sup>              |
| <i>6 weeks</i> |             |               |                                |              |                                 |
| WFA (n=7)      | 0.63 (0.11) | -0.06 (0.12)  | -0.05 (0.08)                   | 0.05 (0.04)  | 0.354 <sup>b</sup>              |
| AI (n=6)       | 0.57 (0.11) | -0.03 (0.10)  | 0.02 (0.04)                    | 0.06 (0.05)  | 0.231 <sup>b</sup>              |
| RFA (n=8)      | 0.63 (0.07) | -0.07 (0.07)  | 0.03 (0.06)                    | -0.06 (0.08) | 0.775 <sup>b</sup>              |

Data expressed as mean (standard error) in mmHg. Significant results in **bold** and borderline ones in ***italic bold***.

Intra-treatment comparison by General Linear Model with Bonferroni correction. P for: <sup>a</sup> quadratic trend; <sup>b</sup> linear trend. No inter-treatment changes were observed.

Inter-treatment comparisons by ANCOVA Model adjusted by age and sex. <sup>^</sup> P<0.07, <sup>†</sup> P<0.05; <sup>‡</sup> P<0.01 versus White Apple treatment; P<0.05
