# Supplementary material for: A red-fleshed apple rich in anthocyanins improves endothelial function, reduces inflammation, and modulates the immune system in hypercholesterolemic subjects: the AppleCOR study
Source: Royal Society of Chemistry journal article supplement (doi:10.1039/d3fo05114e), 2024-01-01
Supplement: d3fo05114e21.pdf [file d3fo05114e21.pdf]

Supplemental Table 27. Changes in Complement markers after 6 weeks of treatment

| Variable                | Treatment     |                                |              |                                |               |                                                                   | Changes among treatments |       |                         |                                           |                        |                                        |
|-------------------------|---------------|--------------------------------|--------------|--------------------------------|---------------|-------------------------------------------------------------------|--------------------------|-------|-------------------------|-------------------------------------------|------------------------|----------------------------------------|
|                         | WFA<br>(n=36) |                                | AI<br>(n=34) |                                | RFA<br>(n=31) |                                                                   | AI vs<br>WFA             |       | RFA vs WFA              |                                           | RFA vs AI              |                                        |
|                         | Post-int      | Change                         | Post-int     | Change                         | Post-int      | Change                                                            | Mean<br>(95%CI)          | P     | Mean<br>(95%CI)         | P                                         | Mean<br>(95%CI)        | P                                      |
| <b>C1q, mg/dL (log)</b> | 1.22 ± 0.44   | <b>-0.465</b><br>(-0.75;-0.17) | 1.03 ± 0.61  | <b>-0.520</b><br>(-0.81;-0.23) | 0.93 ± 0.54   | <b>-0.826</b><br>(-1.1;-0.52)                                     | -0.055<br>(-0.47;0.36)   | 0.793 | -0.361<br>(-0.78; 0.06) | <b>0.092</b><br><i>con</i><br><i>four</i> | -0.307<br>(-0.72;0.11) | 0.149                                  |
| <b>C3, mg/dL (log)</b>  | 1.76 ± 0.79   | -0.219<br>(-0.64; 0.20)        | 1.48 ± 0.82  | <b>-0.469</b><br>(-0.89;-0.05) | 1.59 ± 0.91   | <b>-0.553</b><br>(-0.99;-0.12)<br><b>Igual con</b><br><b>four</b> | -0.251<br>(-0.85;0.34)   | 0.406 | -0.335<br>(-0.94;0.27)  | 0.277                                     | -0.084<br>(-0.69;0.52) | 0.783                                  |
| <b>C4, mg/dL (log)</b>  | 2.43 ± 0.77   | <b>-0.315</b><br>(-0.61;-0.01) | 2.11 ± 0.84  | <b>-0.534</b><br>(-0.83;-0.24) | 2.01 ± 0.60   | <b>-0.610</b><br>(-0.92;-0.30)                                    | -0.220<br>(-0.64;0.20)   | 0.306 | -0.296<br>(-0.73;0.14)  | 0.178                                     | -0.076<br>(-0.50;0.35) | 0.724<br><b>0.118 c</b><br><b>four</b> |

|                              |             |                      |             |                      |             |                      |              |       |              |       |                  |       |
|------------------------------|-------------|----------------------|-------------|----------------------|-------------|----------------------|--------------|-------|--------------|-------|------------------|-------|
| <b>Factor B, mg/dL (log)</b> | 2.43 ± 0.77 | <b>-0.352</b>        | 2.11 ± 0.84 | <b>-0.451</b>        | 2.01 ± 0.60 | <b>-0.565</b>        | -0.099       | 0.580 | -0.213       | 0.250 | -0.114           | 0.531 |
|                              |             | <b>(-0.60;-0.10)</b> |             | <b>(-0.70;-0.20)</b> |             | <b>(-0.83;-0.30)</b> | (-0.45;0.25) |       | (-0.58;0.15) |       | (-0.47;0.25)     |       |
|                              |             |                      |             |                      |             |                      |              |       |              |       | <b>No cambio</b> |       |
|                              |             |                      |             |                      |             |                      |              |       |              |       | <b>con four</b>  |       |

Post-int, post-treatment values. Change, change from baseline. ICAM-1, intercellular adhesion molecule 1; VCAM-1, vascular cell adhesion molecule 1. Data expressed as mean ± standard deviation, mean (95% Confidence Interval, CI) or <sup>a</sup>median (25<sup>th</sup> – 75<sup>th</sup> percentile). ANCOVA Model adjusted by sex and age or <sup>a</sup>Wilcoxon and Man Whitney tests. Significant differences depicted in **bold** and borderline ones in *italic bold*.
