# Supplementary material for: A red-fleshed apple rich in anthocyanins improves endothelial function, reduces inflammation, and modulates the immune system in hypercholesterolemic subjects: the AppleCOR study
Source: Royal Society of Chemistry journal article supplement (doi:10.1039/d3fo05114e), 2024-01-01
Supplement: d3fo05114e22.xlsx [file d3fo05114e22.xlsx]

## Sheet: Full1
Swiss-Prot ID	Protein Name	ΣCoverage	Σ# Proteins	Σ# Unique Peptides	Σ# Peptides	Mascot Score	Σ# PSMs	ID-31	ID-36	ID-41	ID-46	ID-51	ID-56	ID-1	ID-6	ID-11	ID-16	ID-21	ID-26	ID-32	ID-37	ID-42	ID-47	ID-52	ID-57	ID-2	ID-7	ID-12	ID-17	ID-22	ID-27	ID-33	ID-38	ID-43	ID-48	ID-53	ID-58	ID-3	ID-8	ID-13	ID-18	ID-23	ID-28	ID-34	ID-39	ID-44	ID-49	ID-54	ID-59
P58397	A disintegrin and metalloproteinase with thrombospondin motifs 12 OS=Homo sapiens OX=9606 GN=ADAMTS12 PE=1 SV=2 - [ATS12_HUMAN]	0.82	1	1	1	21.43	1		1.14012						1.32437						1.19929						1.17707						1.10951						0.981436						0.940735
P43652	Afamin OS=Homo sapiens OX=9606 GN=AFM PE=1 SV=1 - [AFAM_HUMAN]	40.57	2	20	20	936.598	196	1.04669	1.17363	1.27972	0.894142	1.01628	0.769204	0.926224	1.20645	1.31778	0.847205	1.14473	0.863329	1.10836	0.754142	1.11253	1.07038	1.1131	1.04971	1.33481	1.0464	0.960851	1.02008	1.06548	0.974558	1.12082	1.20127	1.21137	1.14649	1.03989	1.27168	1.10913	1.21765	1.1408	1.30904	0.908764	1.20624	0.871385	1.02678	1.27107	0.778215	1.03026	0.990803
P02763	Alpha-1-acid glycoprotein 1 OS=Homo sapiens OX=9606 GN=ORM1 PE=1 SV=1 - [A1AG1_HUMAN]	42.29	1	6	8	1696.92	321	0.806728	1.06675	0.83314	0.90741	1.26472	0.9168	0.699281	0.977331	0.830084	1.02812	1.1762	0.997225	1.15111	1.04972	1.16906	0.766137	1.0195	1.11305	1.58371	1.13564	1.12593	0.813689	1.60622	1.13218	0.802803	1.04282	1.07136	0.717624	0.634772	1.13464	0.840567	0.799928	1.20714	0.777118	0.912318	1.07995	1.18494	1.02194	0.803865	1.09664	0.700075	1.1366
P19652	Alpha-1-acid glycoprotein 2 OS=Homo sapiens OX=9606 GN=ORM2 PE=1 SV=2 - [A1AG2_HUMAN]	39.8	1	5	7	1561.63	279	1.12201	0.951286	0.779168	1.46754	0.898463	0.845053	0.985174	0.960822	0.864503	1.95382	1.03771	1.01779	0.747256	0.915471	1.15388	0.768003	1.12679	1.11372	0.991769	1.27031	0.924281	0.90855	1.59529	0.985721	1.08779	1.29568	0.723672	0.80959	0.826912	1.06897	1.1248	0.972272	0.861382	0.90408	1.16021	0.851889	1.24986	1.04183	0.696958	1.13161	0.712057	0.928199
P01011	Alpha-1-antichymotrypsin OS=Homo sapiens OX=9606 GN=SERPINA3 PE=1 SV=2 - [AACT_HUMAN]	45.86	4	16	16	1952.9	391	1.20314	0.944012	0.854182	0.957981	1.12226	1.06028	1.09276	0.883174	0.808483	0.940926	1.16455	1.22551	0.994247	1.11477	1.14918	1.20103	0.880596	0.97099	1.00144	1.11584	1.40052	1.05939	0.973509	1.12413	0.879544	0.937189	1.07467	1.04012	1	0.813928	0.945435	1.10644	1.08894	1.05926	1.05405	0.835121	0.957778	0.833689	1.13802	1.04542	0.906714	1.11464
A0A024R6I7	Alpha-1-antitrypsin OS=Homo sapiens OX=9606 GN=SERPINA1 PE=1 SV=1 - [A0A024R6I7_HUMAN]	57.18	9	1	26	3978.49	1037	0.132716	0.11005	0.162951	0.179389	2.73126	0.314559	0.0329872	0.0920318	0.197519	0.0809461	2.92274	0.250842	0.155301	2.66722	4.10012	0.837368	0.167492	0.227382	0.137166	3.26836	4.98373	1.09154	0.225386	0.164885	3.65636	0.167411	0.0812847	2.70458	0.181418	0.190471	3.06413	0.164687	0.737801	2.88413	0.215565	0.187099	0.188591	0.152842	0.253558	2.70731	0.489081	2.04522
P01009	Alpha-1-antitrypsin OS=Homo sapiens OX=9606 GN=SERPINA1 PE=1 SV=3 - [A1AT_HUMAN]	59.57	8	2	27	4110.99	1072	1.13692	1.69275	1.12847	1.32804	0.602086	1.36067	0.732695	1.38854	1.05396	1.14214	0.591154	1.29883	1.00382	0.685374	0.77285	0.731102	0.516021	0.626525	0.93873	0.704104	0.951793	0.820077	0.602329	1.1457	0.901915	1.14721	1.78897	0.638222	1.44549	1.23639	0.907882	1.26503	1.46392	0.714823	1.26928	1.42489	1.21497	1.21283	1.10122	0.67903	0.900594	0.459415
P04217	Alpha-1B-glycoprotein OS=Homo sapiens OX=9606 GN=A1BG PE=1 SV=4 - [A1BG_HUMAN]	35.76	3	11	11	988.975	212	1.03271	1.00569	1.01973	0.983421	1.10592	1.13822	0.829931	1.01882	0.864032	1.17169	1.08781	1.0505	0.943054	1.00045	1.29518	1.08334	1.2665	1.02999	1.20253	0.980283	1.05201	1.13406	1.41803	0.963077	1.10143	1.1966	0.944755	1.02239	0.916553	0.955946	1.03898	0.954625	1.07287	0.965884	1.0906	0.759883	1.18835	0.960651	0.895657	1.02294	0.991557	1.2726
P08697	Alpha-2-antiplasmin OS=Homo sapiens OX=9606 GN=SERPINF2 PE=1 SV=3 - [A2AP_HUMAN]	20.98	7	7	7	411.385	92	1.18353	0.829283	1.35837	1.00156	1.08868	1.14343	1.16085	0.867201	1.11472	0.800329	1.23973	0.964694	1.00215	0.729058	1.24543	1.00767	1.14612	1	1.29297	0.882104	0.81562	1.07436	0.819242	1.07265	0.844792	1.00141	0.997229	1.04829	0.90547	1.66679	1.33836	1	1.02193	0.878784	0.965827	0.889981	0.761728	0.818105	1.04405	0.904958	1.08105	1.19489
P02765	Alpha-2-HS-glycoprotein OS=Homo sapiens OX=9606 GN=AHSG PE=1 SV=2 - [FETUA_HUMAN]	41.14	3	9	9	743.215	214	1.12416	1.197	0.918527	0.819143	0.672638	0.733529	1.0694	1.12426	1.00658	0.902095	0.625209	0.766091	0.860032	0.679962	1.42241	1.20918	1.256	1.07055	1.16395	0.79466	0.875929	1.22438	1.32122	0.952166	1.0863	1.39786	0.980262	1.09249	0.877303	1.1871	0.955818	0.974039	1.07166	1.10861	0.97735	1.06395	1.17849	1.02519	0.902675	0.862851	0.932377	1.06333
P01023	Alpha-2-macroglobulin OS=Homo sapiens OX=9606 GN=A2M PE=1 SV=3 - [A2MG_HUMAN]	61.87	5	69	69	11127.6	2163	0.966857	1.06579	1.29736	0.857425	0.900642	0.946738	0.955519	0.957024	1.26109	0.715237	0.986989	1.15109	1.22589	1.02334	0.754343	1.25103	0.703862	0.760482	1.06049	0.891481	0.863709	1.26288	0.687095	0.821476	1.11555	0.850286	0.977468	0.848066	0.877791	1.16407	1.02238	0.929911	0.898612	0.86125	0.839843	1.25121	0.999365	1.07884	1.11978	0.996425	1.08833	0.912892
P02771	Alpha-fetoprotein OS=Homo sapiens OX=9606 GN=AFP PE=1 SV=1 - [FETA_HUMAN]	1.15	2	1	1	68.5667	18
P01019	Angiotensinogen OS=Homo sapiens OX=9606 GN=AGT PE=1 SV=1 - [ANGT_HUMAN]	26.39	1	9	9	1068.76	147	1.33341	1.15733	1.08511	1.01945	0.969818	0.949105	1.17871	1.09449	0.961207	1.04573	0.944964	0.898912	1.31496	1.16684	1.22798	0.96838	1.30693	1.28717	1.13081	1.04078	1.29037	0.989888	1.14871	0.859653	0.928061	1.02739	1.10012	1.06809	1.23513	0.820726	1.11949	1.28477	1.00035	1.25435	1.25098	0.967677	1.18775	0.932354	0.946621	0.861994	1.1171	0.968626
P01008	Antithrombin-III OS=Homo sapiens OX=9606 GN=SERPINC1 PE=1 SV=1 - [ANT3_HUMAN]	55.39	3	21	21	1598.99	390	1.08942	1.20015	0.872852	1.02256	0.927858	0.952956	1.0456	1.12527	1.01026	0.886293	0.992938	1.16064	1.07054	1.028	1.00083	1.08153	0.863968	0.972177	1.15214	1.01521	1.10975	1.08084	0.927474	0.918387	1.03843	0.854313	0.902804	0.974808	0.943374	0.937543	0.974636	0.983914	0.914834	0.949898	1.01268	0.961665	0.997737	1.07021	0.949371	0.943855	0.979404	1.0467
P02647	Apolipoprotein A-I OS=Homo sapiens OX=9606 GN=APOA1 PE=1 SV=1 - [APOA1_HUMAN]	67.42	3	24	24	4546.69	967	1.24521	1.13165	1.11873	1.09162	0.749151	0.937524	1.24884	1.31439	1.13154	1.25549	0.831413	0.97242	1.05869	0.859189	1.13964	1.13342	0.960174	0.998085	1.36404	1.09914	0.947582	1.2333	0.991303	0.761387	0.950221	1.05803	0.95585	0.908552	0.946292	0.80566	0.901239	1.03844	0.94017	0.990812	1.02347	0.729912	0.905224	0.751944	1.43433	0.686967	1.08226	1.23172
P02652	Apolipoprotein A-II OS=Homo sapiens OX=9606 GN=APOA2 PE=1 SV=1 - [APOA2_HUMAN]	62	6	6	6	1822.75	310	1.301	0.945763	1.27875	1.16627	0.77884	0.9411	1.20393	1.04855	1.11472	1.32475	0.923157	0.87979	0.959491	0.744284	1.38162	1.13187	1.22	1	1.4363	0.978872	0.793878	1.07133	1.25166	0.761508	1.12344	1.27551	1.07243	1.20611	1.16554	0.984926	1.23147	0.956368	1.05353	1.20265	1.38108	0.782316	0.901763	0.879526	1.15814	0.804602	0.961167	1.54817
P06727	Apolipoprotein A-IV OS=Homo sapiens OX=9606 GN=APOA4 PE=1 SV=3 - [APOA4_HUMAN]	51.52	2	22	22	1291.52	283	1.15155	1.05818	0.885752	1.11947	0.89152	0.85938	1.15605	1.13234	0.796224	1.06003	1.06999	0.949219	0.963715	0.813479	1.51028	1.12852	0.98344	0.778306	1.4044	0.969192	0.804789	1.117	0.711509	0.732281	0.822779	1.18519	1.27178	1.00728	1.60735	0.760789	0.719875	0.875537	0.999645	0.967915	1.7587	0.8231	1.49149	0.73209	1.4812	0.636275	0.899968	1.33449
P04114	Apolipoprotein B-100 OS=Homo sapiens OX=9606 GN=APOB PE=1 SV=2 - [APOB_HUMAN]	40.37	7	148	148	12178.7	2300	1.24774	1.02203	1.40362	1.14554	0.897007	0.854466	1.13937	0.973738	1.28152	0.898247	0.958396	0.956013	1.3478	0.870101	0.814782	1.04227	0.935906	0.865278	1.28644	0.961236	0.901076	1.04918	0.774577	0.920472	1.07667	1	1.07943	1.13389	1.15157	0.853512	1.03533	1.0919	1.04559	1.2629	1.1614	0.846028	1.17781	0.566902	1.04155	1.15519	0.969302	0.942182
K7ERI9	Apolipoprotein C-I (Fragment) OS=Homo sapiens OX=9606 GN=APOC1 PE=1 SV=1 - [K7ERI9_HUMAN]	35.06	6	4	4	359.036	101	1.03692	0.871106	1.14071	1.37068	0.662816	0.857208	0.872338	0.901403	1.24142	1.24353	0.729692	1.112	1.188	0.74052	0.92597	1.11659	0.862648	1.23694	1.65396	0.979786	0.902429	1.50566	0.774215	0.926222	1.05165	1.05935	0.757541	1.09089	0.964679	0.695651	0.897575	0.974503	0.758462	1.03049	0.935475	0.630456	1.09585	0.655646	1.28573	0.876381	0.972332	1.15458
P02655	Apolipoprotein C-II OS=Homo sapiens OX=9606 GN=APOC2 PE=1 SV=1 - [APOC2_HUMAN]	40.59	4	3	3	478.427	72	0.821159	0.76118	1.81385	1.33574	0.635844	0.998005	0.551108	0.83288	1.7545	1.53502	0.675039	0.916942	1.37232	0.721145	0.586832	0.950037	0.867846	1.357	1.91337	0.725454	0.738153	1.212	0.894222	0.910202	1.02999	1.11953	0.447042	1.35941	0.831674	0.939561	0.921999	0.951454	0.697679	1.4669	0.89153	0.794155	1.45535	0.623369	0.866871	1.3473	0.912835	1.17564
P02656	Apolipoprotein C-III OS=Homo sapiens OX=9606 GN=APOC3 PE=1 SV=1 - [APOC3_HUMAN]	53.54	2	4	4	619.13	114	1.12342	0.815351	1.41124	1.14331	0.728078	0.745999	0.818054	0.882352	1.39109	1.42968	0.72729	0.872699	1.63179	0.866632	0.836353	1.0726	1.0896	1.04258	2.23129	0.844027	0.802415	1.22015	0.924989	0.757045	1.07194	1.21491	0.665038	1.27849	0.826232	1.20708	0.915371	0.856058	0.751414	1.25061	0.950931	0.712265	1.98623	0.654406	1.17074	1.23852	1.04075	1.47677
P05090	Apolipoprotein D OS=Homo sapiens OX=9606 GN=APOD PE=1 SV=1 - [APOD_HUMAN]	34.39	4	6	6	262.68	41	1.18302	1.43953	1.12195	1.11506	0.613149	0.872282	1.15808	1.3816	1.22704	1.13358	0.712109	0.786458	0.970583	0.754505	1.47193	1.32962	0.83624	0.957158	1.40397	0.984603	1.06277	1.40418	0.816521	0.692601	1.09009	1.13877	1.40172	1.04502	1.22639	0.767384	1.44662	0.932731	1.24772	0.963881	1.64629	0.799558	1.21955	0.7151	1.27925	0.704521	0.639814	1.73205
P02649	Apolipoprotein E OS=Homo sapiens OX=9606 GN=APOE PE=1 SV=1 - [APOE_HUMAN]	39.43	5	12	12	687.651	124	0.780094	0.989009	1.36625	1.18396	0.815413	1.18174	0.692746	0.712106	1.09952	0.952105	0.722476	1.30585	1.23966	0.830047	0.8682	1.22756	0.913772	0.974176	1.33833	0.913276	1.09871	1.34409	0.830856	0.995313	0.855361	0.837565	0.812318	0.875258	0.761171	0.74226	0.79645	1.26195	0.962748	0.913824	0.668023	0.923116	1.17591	0.763699	1.26738	1.2516	1.00885	1.28297
Q13790	Apolipoprotein F OS=Homo sapiens OX=9606 GN=APOF PE=1 SV=2 - [APOF_HUMAN]	13.8	1	2	2	107.277	20	1.49838	0.653646	1.61723	0.70631	1.10592	3.10437	1.20393	2.88527	1.11472	0.718745	1.88528	1.19209	0.943054	2.54681	1.72477	1.20918	1.33664	0.983673	1.55575	0.558338	1.58156	1.26288	0.81375	1.05514	1.07161	1.00824	1.07243	1.50391	1.02319	1.87475	2.12336	0.354733	1.27815	0.840208	0.97735	0.642472	0.556422	2.87429	0.711254	1.03941	2.55784	1.89291
O14791	Apolipoprotein L1 OS=Homo sapiens OX=9606 GN=APOL1 PE=1 SV=5 - [APOL1_HUMAN]	20.1	2	4	4	249.335	37	1.12907	0.896773	1.3454	1.56393	0.488758	1.59479	1.20393	0.807288	1.12273	1.12725	0.877993	0.880383	1.0937	0.641704	1.61167	1.09002	0.7895	1.41676	1.55575	0.837403	1.31046	0.950652	0.772019	1.06959	1.0863	1.32301	1.0559	1.66759	1.22719	1.34386	1.34621	0.645148	1.25845	0.934861	1.09847	1.34973	0.6175	0.753946	1.32804	1.33935	1.14753	1.07966
O95445	Apolipoprotein M OS=Homo sapiens OX=9606 GN=APOM PE=1 SV=2 - [APOM_HUMAN]	20.21	1	2	2	139.06	19	0.748787	1.05432	0.928769	1.28637	1.22244	1.07355	1.13803	1.5215	0.990049	1.77175	0.851592	1.5065	0.886112	0.721464	0.71526	1.33131	0.941521	1.00222	0.431561	1.51562	1.08588	1.14929	1.02425	1.38706	1.05582	1.20538	1.43154	1.1983	1.3375	0.946139	0.978177	1.27845	0.913318	1.75433	1.41665	1.42344	1.00464	1.05935	1.46826	1.01503	1.19087	1.41924
A0A087WWY0	Apolipoprotein(a) OS=Homo sapiens OX=9606 GN=LPA PE=1 SV=1 - [A0A087WWY0_HUMAN]	31.35	2	3	3	261.429	40	0.836897	1.16177	0.385567	0.540259	1.12173	1.82525	0.753842	1.33195	0.412215	0.46776	1.19483	3.10511	0.494985	0.461219	2.11648	0.886854	2.44258	0.187693	0.62019	0.47714	3.05557	0.910182	2.26294	0.305697	0.0870816	0.225945	0.652853	0.309592	0.187903	0.444892	0.046614	0.226881	0.987948	0.179814	0.286	0.208608	0.128533	0.0990485	1.47524	4.83389	1.34129	0.617082
Q5STZ8	ATP-binding cassette sub-family F member 1 (Fragment) OS=Homo sapiens OX=9606 GN=ABCF1 PE=1 SV=9 - [Q5STZ8_HUMAN]	3.24	2	1	1	23.34	3	1.02771						0.967238						0.985408						1.15117						1.07332						0.823198						0.909157
A0A2R8YF89	ATP-dependent RNA helicase DDX3X (Fragment) OS=Homo sapiens OX=9606 GN=DDX3X PE=1 SV=1 - [A0A2R8YF89_HUMAN]	7.29	20	1	1	20.19	1
I3L1Q2	B-cell CLL/lymphoma 7 protein family member C (Fragment) OS=Homo sapiens OX=9606 GN=BCL7C PE=1 SV=1 - [I3L1Q2_HUMAN]	2.39	1	1	1	20.42	1
P02749	Beta-2-glycoprotein 1 OS=Homo sapiens OX=9606 GN=APOH PE=1 SV=3 - [APOH_HUMAN]	43.19	4	11	11	1271.75	237	1.17735	1.31308	1.13652	1.15723	1.22542	0.978309	1.13511	1.2854	1.17285	1.69955	1.3405	1.03707	1.0674	1.07785	1.81272	1.20075	0.845719	1.30649	1.52664	1.22049	1.28975	1.42048	0.739891	0.902558	1.13536	0.871941	0.668883	1.1449	0.663656	1.71466	1.00982	0.524414	0.679484	1.40379	0.851821	1.13476	0.799639	1.24628	1.15415	1.08654	0.615805	1.75203
J3KRP0	Beta-Ala-His dipeptidase OS=Homo sapiens OX=9606 GN=CNDP1 PE=1 SV=2 - [J3KRP0_HUMAN]	4.31	2	1	1	135.71	3
P04003	C4b-binding protein alpha chain OS=Homo sapiens OX=9606 GN=C4BPA PE=1 SV=2 - [C4BPA_HUMAN]	30.49	4	14	14	897.463	211	0.997268	1.11009	0.867423	0.986313	0.981471	0.929842	0.974682	0.972229	0.82801	1.11831	0.989072	0.911141	0.985419	0.871004	1.18442	0.941967	1.15875	0.966503	1.15927	1.12308	0.992775	1.01313	1.35365	1.00164	0.910037	1.24171	0.960342	0.912334	0.860723	0.847797	0.882909	1.00788	1.00705	1.05168	0.986996	1.02464	1.09558	0.839604	0.909364	1.00097	0.985547	0.987955
P22792	Carboxypeptidase N subunit 2 OS=Homo sapiens OX=9606 GN=CPN2 PE=1 SV=3 - [CPN2_HUMAN]	12.84	1	3	3	154.951	31	1.49838	0.921764	1.39345	0.70631	1.10592	3.08673	1.20393	0.836002	1.16124	0.718745	1.3927	0.964694	0.943054	0.714967	1.13175	1.20918	1.20863	1	1.464	0.955208	0.888445	1.26288	0.814424	1.07265	0.984911	0.991531	1.27236	1.53907	0.988609	1.83016	1.85335	0.912906	1.11676	0.840208	0.983382	1.00444	1.29007	0.774253	1.24278	0.706198	1.78096	1.88185
O43866	CD5 antigen-like OS=Homo sapiens OX=9606 GN=CD5L PE=1 SV=1 - [CD5L_HUMAN]	38.04	1	11	11	686.701	138	0.670885	0.675846	0.786684	1.11289	0.531203	1.84022	0.710289	0.807288	0.818024	0.95938	0.556056	1.89172	0.622575	1.06929	0.647639	0.558448	0.825583	1.02123	0.567625	1	0.667298	0.712453	0.978803	1.06738	1.02199	0.992792	0.715607	0.996957	1.06603	0.811622	1.1147	1.06124	0.686294	1.03103	1.08204	0.740613	0.516866	1.16065	1.25118	1.60079	1.07458	0.602926
B4E1Z4	cDNA FLJ55673, highly similar to Complement factor B OS=Homo sapiens OX=9606 PE=1 SV=1 - [B4E1Z4_HUMAN]	24.88	13	25	25	1746.27	362	0.992404	1.11988	0.809652	0.939707	0.949685	1.034	0.998778	1.02474	0.956825	0.980313	0.99714	1.02259	0.932014	1.08223	0.985551	0.81819	1.06024	1.09329	1.05186	1.13208	1.25435	0.87323	1.21126	1.08798	0.817803	1.09357	0.839379	0.933844	0.929846	1.26585	0.915282	1.13238	0.930082	0.999434	1.01	1.21947	1.07932	1.04571	0.896573	1.25166	1.07067	0.984788
P00450	Ceruloplasmin OS=Homo sapiens OX=9606 GN=CP PE=1 SV=1 - [CERU_HUMAN]	43.19	6	33	33	4101.18	735	1.00626	0.86964	0.852006	1.04982	0.909531	0.971523	1.09255	0.834149	0.855305	0.991096	0.914854	1.00994	1.00841	1.12601	1.00291	0.989216	0.977468	1.13057	0.948963	1.06595	1.15298	1.00613	1	1.15174	0.976986	0.910288	0.982206	0.826139	0.952154	0.959653	0.954931	1.07767	1.00697	0.87046	1.05869	0.993516	0.917304	0.953784	0.846446	1.18606	1.01141	0.980916
J3KSW5	Chromodomain-helicase-DNA-binding protein 9 (Fragment) OS=Homo sapiens OX=9606 GN=CHD9 PE=1 SV=1 - [J3KSW5_HUMAN]	35.25	1	1	1	20.96	1
P10909	Clusterin OS=Homo sapiens OX=9606 GN=CLU PE=1 SV=1 - [CLUS_HUMAN]	20.49	10	8	8	701.353	138	0.97226	1.2223	0.88186	1.04497	0.88652	0.894821	0.930291	1.0806	0.933953	1.05456	0.910806	0.969547	0.923877	0.946082	1.08737	1.01074	0.984401	1.06846	1.19009	1.10789	0.991664	1.03447	0.990328	0.998873	0.938339	0.979151	0.911438	1.05645	0.998755	0.955883	0.848268	1.00148	0.944072	1.11186	1.09142	0.957207	1.0624	1	0.876172	0.903849	0.932424	1.09321
P00740	Coagulation factor IX OS=Homo sapiens OX=9606 GN=F9 PE=1 SV=2 - [FA9_HUMAN]	6.07	1	1	1	27.28	2	1.49838				1.10592		1.20393				1.88528		0.943054				1.34566		1.55575				0.819242		1.0863				0.835317		2.15247				0.97735		0.556422				2.58769
P00748	Coagulation factor XII OS=Homo sapiens OX=9606 GN=F12 PE=1 SV=3 - [FA12_HUMAN]	9.92	1	5	5	211.82	58	1.22024	1.60343	0.595251	0.846382	1.10592	0.800887	1.25177	1.13394	0.316059	0.788353	1.2308	0.861712	0.753012	1.3181	0.725757	1.21845	1.07211	1.17621	0.919715	1.53234	0.829941	1.15904	1.17061	1.06144	0.793237	1.18373	0.734505	0.804811	1.23312	1.28018	0.807667	1.0157	0.913067	0.742643	1.08224	1.20643	1.20095	0.874245	1.14014	0.786186	1.30914	1.11124
P00488	Coagulation factor XIII A chain OS=Homo sapiens OX=9606 GN=F13A1 PE=1 SV=4 - [F13A_HUMAN]	3.01	1	1	1	48.29	2	1.31844				1.07886		0.617382				1.10981		0.997852				1.48308		1.0351				1.93261		0.71661				0.861768		0.972479				1.344		0.900566				1.5876
P05160	Coagulation factor XIII B chain OS=Homo sapiens OX=9606 GN=F13B PE=1 SV=3 - [F13B_HUMAN]	3.63	1	2	2	88.7	6	1.35962			1.04726	0.936839		1.124			1.38523	1.00987		1.69044			0.744562	1.12138		1.19336			0.970616	1.74435		1.53276			0.962623	1.30311		1.17371			1.00083	1.31668		1.8067			1.01271	0.800382
X6RLJ0	Complement C1q subcomponent subunit A (Fragment) OS=Homo sapiens OX=9606 GN=C1QA PE=1 SV=7 - [X6RLJ0_HUMAN]	4.55	2	1	1	112.777	12	1.03267	0.981547	1.15086	1.12736	1.03699	1.08716	1.04572	1.2142	0.864177	0.738399	1.22137	1.0109	1.3168	0.939747	1.00572	1.02664	1.08943	0.859958	0.988207	1.0965	0.825654	0.992927	1.23152	0.984952	1.14715	0.933029	1.30601	1.05567	1.56057	0.858676	1.06877	1.00213	0.990517	1.08999	1.10954	1.4404	1.11326	1.03205	1.12286	1.10505	0.953039	0.851955
A0A0A0MSV6	Complement C1q subcomponent subunit B (Fragment) OS=Homo sapiens OX=9606 GN=C1QB PE=1 SV=6 - [A0A0A0MSV6_HUMAN]	22.81	4	4	4	415.316	54	0.886403	0.772845	0.996535	0.922645	0.912239	0.947058	0.863651	1.09452	0.940134	0.80381	0.94494	0.710617	1.07777	0.919391	0.805963	0.906625	0.850262	0.841725	0.95986	0.836135	0.982867	1.05605	0.766343	0.96692	1.01688	0.885735	1.00233	0.891516	1.28296	1.16037	0.934515	0.863672	0.958445	0.858337	0.943169	0.931923	1.07273	0.963467	0.949617	0.827641	0.60513	0.487208
P02747	Complement C1q subcomponent subunit C OS=Homo sapiens OX=9606 GN=C1QC PE=1 SV=3 - [C1QC_HUMAN]	21.22	1	4	4	142.37	32	1.12558	0.866832	0.993324	0.998865	1.0189	0.787036	0.963336	1.34193	1.09437	0.712085	1.1811	1.21078	1.13127	1.03742	0.847209	0.914562	0.92232	0.851079	1.2109	0.910166	0.977154	1.09838	1.03526	0.994059	1.01271	1.07449	0.940878	1	1.15552	0.945131	1.00226	0.981887	0.989102	0.953198	1.07911	1.08439	1.40197	0.933223	0.905783	0.919693	0.657792	0.786892
A0A3B3ISR2	Complement C1r subcomponent OS=Homo sapiens OX=9606 GN=C1R PE=1 SV=1 - [A0A3B3ISR2_HUMAN]	25.82	10	12	12	620.941	162	0.940661	0.963098	0.908774	0.945229	0.988117	0.928116	0.953654	0.958054	1.0075	1.0312	0.863486	0.999136	0.935519	1.08545	0.968193	0.931224	0.948031	1.06183	1.08575	1.0968	1.11485	0.917731	1.25573	0.96573	0.928445	1.00139	0.897516	1.00001	0.993014	1.15291	0.961034	0.984177	0.884982	1.04646	1.14045	0.979754	1.1364	1.05671	0.854088	0.976606	0.845643	0.937958
P09871	Complement C1s subcomponent OS=Homo sapiens OX=9606 GN=C1S PE=1 SV=1 - [C1S_HUMAN]	15.12	9	7	7	482.233	62	0.977171	1.10201	1.12499	1.02021	1.03615	1.11933	0.964347	1.11954	1.35847	0.850018	1.07004	1.14213	1.13867	1.00244	0.973452	1.08465	1.02303	1.4038	1.07948	1.11522	1.19651	0.99278	1.10947	1.25036	0.958112	0.913053	0.767235	0.988695	1.02483	1.04656	0.995025	1.15195	1.11247	1.07566	1.12337	1.04529	1.23638	1.04009	0.924606	0.887141	0.934065	0.729665
P01024	Complement C3 OS=Homo sapiens OX=9606 GN=C3 PE=1 SV=2 - [CO3_HUMAN]	70.54	6	87	96	13909.2	2908	0.99845	0.59861	0.983478	1.06101	1.07567	0.965855	0.952229	0.531294	0.940882	0.889057	1.18118	0.995913	1.17054	1.02307	0.916961	0.997774	0.999238	0.888856	1.03059	1.0068	1.06527	0.979423	0.936517	1.04718	0.983977	0.985811	1.08265	1.00197	0.989275	1.09799	1.02339	1.0369	1.0411	1.09302	0.97735	1.23295	0.999981	0.918449	0.962995	1.27094	0.969377	0.820138
A0A140TA32	Complement C4-A OS=Homo sapiens OX=9606 GN=C4A PE=1 SV=1 - [A0A140TA32_HUMAN]	52.41	5	0	67	4355.22	932
A0A140TA44	Complement C4-A OS=Homo sapiens OX=9606 GN=C4A PE=1 SV=1 - [A0A140TA44_HUMAN]	52.41	4	1	67	4335.74	930	0.700452	0.957176	0.462226	1.09061	0.832334	0.546481	0.518791	0.877415	0.524004	0.917485	0.693415	0.759911	0.96965	1.29433	0.789523	0.864585	1.3188	1.05535	0.997689	1.22498	1.07321	0.991159	1.32519	0.980305	0.984694	0.971575	0.833147	0.892678	0.835314	0.521343	1.02666	1.10291	0.917242	1.06401	0.909488	0.60265	1.06197	1.29232	1.24147	1.44508	0.773312	1.45885
P0C0L4	Complement C4-A OS=Homo sapiens OX=9606 GN=C4A PE=1 SV=2 - [CO4A_HUMAN]	50.75	3	1	67	4272.01	937	0.407513	0.173466	1.04135	0.734429	1.41523	1.30255	0.659695	0.390897	0.620152	1.18956	1.57697	0.844814	1.45818	0.684532	0.671479	1.01252	1	0.63571	0.516957	1.02436	1.15422	0.912504	0.89389	1.12251	0.563145	0.58942	1.04109	0.457119	1.42802	0.559724	0.5152	1.17705	0.577304	0.901293	1.14063	1.5365	0.440025	0.632427	1.08123	0.614974	1.63196	1.46665
A0A140TA29	Complement C4-B OS=Homo sapiens OX=9606 GN=C4B PE=1 SV=1 - [A0A140TA29_HUMAN]	54	2	2	68	4462.6	949	0.175331	0.576434	0.877914	0.639088	1.68122	0.709613	0.080194	0.52147	0.954586	0.586761	1.89113	0.745847	1.68496	1.28802	0.862894	0.836231	1.3112	1.03294	1.25266	1.08315	0.951332	0.718659	1.10373	1.14876	1.03803	1.04962	0.906856	0.651404	0.880878	0.555303	1.0674	1.4878	0.965669	0.517323	0.946592	0.671482	0.957951	1.09285	0.907249	0.852851	1.21174	1.47565
P01031	Complement C5 OS=Homo sapiens OX=9606 GN=C5 PE=1 SV=4 - [CO5_HUMAN]	16.83	2	17	17	931.199	151	1.22586	1.13166	1.37832	0.951566	1.10592	1.15851	1.21515	0.896957	1.17231	1.04632	1.26416	0.964694	1.25271	1.35723	1.11698	1.37215	1.17076	1.1183	0.967366	1.19515	1.36465	1.0622	1.13291	1.12051	0.96515	0.953463	1.37419	1.09611	1.36645	1.19382	0.930106	1.03379	1.15628	1.21026	1.51634	1.14628	0.959389	1.01547	1.03128	1.12398	1.39809	1.10184
P13671	Complement component C6 OS=Homo sapiens OX=9606 GN=C6 PE=1 SV=3 - [CO6_HUMAN]	5.89	2	4	4	433.32	50	0.557942	1.1104	0.90891	0.976169	1.23594	1.27836	0.694978	1.09985	0.838351	1.22554	1.50558	1.1545	0.991533	1.18222	0.914196	0.87379	0.926429	1.1278	0.85295	1.15023	1.11835	0.843303	1.04181	1.06716	1.07686	0.977074	0.374852	0.803879	0.877651	1.642	0.928198	0.949563	0.822995	1	0.917306	1.08157	0.661475	1.10161	0.975512	1.22155	1.37802	1.29655
P10643	Complement component C7 OS=Homo sapiens OX=9606 GN=C7 PE=1 SV=2 - [CO7_HUMAN]	3.8	1	2	2	101.597	10	1.39447	0.886755	1.12558	0.70631	1.10592	2.34544	1.25549	1.06855	0.552097	0.718745	1.88528	0.964694	1.20466	1.10699	0.958272	1.20918	1.34566	0.875061	1.15145	1.04446	1.02278	1.26288	0.819242	1.07265	1.17572	1.03762	1.1094	1.50169	0.835317	1.44888	1.7099	1.25113	0.963148	0.808394	0.97735	0.645905	1.01419	0.537359	1.0019	0.856539	2.58769	1.44824
P07357	Complement component C8 alpha chain OS=Homo sapiens OX=9606 GN=C8A PE=1 SV=2 - [CO8A_HUMAN]	6.85	1	3	3	232.81	30	1.10992	0.961626	0.55918	1.5367	1.01569	1.03892	0.953917	0.768529	0.814662	0.787067	0.933189	0.958682	0.951141	0.886485	0.653175	1.09956	1.23052	1.10321	1.1588	0.634684	0.883742	0.94848	1.11805	1.00117	0.916077	0.91015	0.417457	1.01343	0.835317	1.11091	1.08988	0.89812	0.574432	1.31329	0.97735	1.04585	1.07198	0.836705	0.893775	1.28672	1.23317	1.43212
F5GY80	Complement component C8 beta chain OS=Homo sapiens OX=9606 GN=C8B PE=1 SV=1 - [F5GY80_HUMAN]	10.59	3	3	3	146.25	18	1.17236	0.680392	1.61723	0.70631	1.10592	1.97495	1.01458	0.975244	1.11472	0.764446	1.88528	0.957065	0.93604	0.924183	1.72477	0.788198	1.33415	1.01012	1.24543	0.65575	1.00437	0.794318	1.1701	1.00176	0.888262	1.32069	1.07243	0.724109	1.06905	1.4682	1.72313	0.464665	1.27815	0.746775	0.97735	0.852923	0.793673	0.942822	0.711254	0.787336	2.54958	1.44193
A0A3B3ITK5	Complement component C8 gamma chain (Fragment) OS=Homo sapiens OX=9606 GN=C8G PE=1 SV=1 - [A0A3B3ITK5_HUMAN]	33.85	2	1	1	171.57	16
P02748	Complement component C9 OS=Homo sapiens OX=9606 GN=C9 PE=1 SV=2 - [CO9_HUMAN]	20.75	2	8	8	245.81	54	0.96422	1.06065	1.03691	0.848398	1.08838	1.18221	0.927478	0.890438	1.01043	0.930302	1.28872	0.973258	0.804683	1.18741	1.1337	1.04892	1.15931	1.14938	1.00291	1.20497	1.81645	1.24377	1.00238	1.08552	0.750405	0.914293	0.874282	0.927462	0.798409	1.17412	0.997744	1.09833	1.11922	0.875793	1.0136	1.16626	0.868906	1.20021	0.738301	1	1.17839	1.26996
A0A0D9SG88	Complement factor H OS=Homo sapiens OX=9606 GN=CFH PE=1 SV=1 - [A0A0D9SG88_HUMAN]	63.47	2	1	19	1026.32	260						0.817318						0.667795						1.08764						0.889287						0.950494						1.18087						1.81191
P08603	Complement factor H OS=Homo sapiens OX=9606 GN=CFH PE=1 SV=4 - [CFAH_HUMAN]	41.27	4	16	36	2593.43	560	0.89381	0.992421	0.803981	0.922323	1.08111	0.960961	0.787506	0.960621	0.837721	1.02999	1.06512	0.859388	0.895639	0.985068	1.20516	0.827143	1.18703	0.812964	1.17842	1.10737	0.997308	0.878355	1.53932	0.847353	0.958083	1.27596	0.851838	0.803314	0.968689	1.16186	0.769012	0.932808	0.980776	0.91222	1.18336	1.08807	1.23696	1.05429	0.887039	1.02458	0.886499	1.07324
B1AKG0	Complement factor H-related protein 1 OS=Homo sapiens OX=9606 GN=CFHR1 PE=1 SV=1 - [B1AKG0_HUMAN]	25.09	7	3	5	158.803	56	1.37664	1.18987	1.22334	1.49986	0.999142	1.10392	1.07447	1.22734	1.29631	1.6555	0.983502	0.96086	0.584441	1.07183	1.4527	2.27342	1.24122	1.25867	0.805714	0.801108	1.2265	2.14361	1.12143	1.23248	1.06738	1.07927	1.18964	0.962015	1.22482	0.859678	1.46499	1.28921	1.25331	1.64046	1.27069	0.936198	0.985194	1.03253	0.711254	0.889322	1.06283	1.20501
G3XAM2	Complement factor I OS=Homo sapiens OX=9606 GN=CFI PE=1 SV=1 - [G3XAM2_HUMAN]	20.83	6	9	9	533.693	60	1.06212	1.0999	1.00368	0.957088	1.08595	0.980056	1.04764	1.38365	0.94782	1.0701	1.21026	1.06653	1.13224	1.17554	0.952933	1.08734	1.14227	1.15321	1.01886	1.31232	1.15167	0.950432	1.09063	1.10068	1.10088	1.06025	0.950228	1.01619	0.922964	1.14528	0.926829	0.970347	0.954489	1.07008	0.998305	1.1478	1.29667	1.2212	0.850766	1.27021	0.872519	1.10959
P08185	Corticosteroid-binding globulin OS=Homo sapiens OX=9606 GN=SERPINA6 PE=1 SV=1 - [CBG_HUMAN]	15.8	2	5	5	219.33	39	1.43863	0.783607	0.991919	1.03058	0.715576	0.825466	1.19462	0.864756	1.10491	0.951351	0.752556	0.904562	1.31358	1.00599	0.905731	1.10386	1.00147	0.824132	1.36862	1.19268	0.874803	0.941248	0.839914	1.09359	0.988305	1.09196	0.958947	0.827103	1.20218	0.778353	0.928035	1.01787	1.02268	1.05159	0.958332	1.00364	0.837017	0.926527	0.952424	0.994404	0.916491	0.906865
H7C1Q8	DIS3-like exonuclease 2 (Fragment) OS=Homo sapiens OX=9606 GN=DIS3L2 PE=1 SV=1 - [H7C1Q8_HUMAN]	4.22	1	1	1	20.72	4
Q5T0V7	Dystonin (Fragment) OS=Homo sapiens OX=9606 GN=DST PE=1 SV=1 - [Q5T0V7_HUMAN]	2.9	7	1	1	27.72	2
Q16610	Extracellular matrix protein 1 OS=Homo sapiens OX=9606 GN=ECM1 PE=1 SV=2 - [ECM1_HUMAN]	5.19	1	1	1	20.58	1			0.591321						0.407584						0.721728						0.280363						0.448756						0.865553						0.297622
Q8IYD8	Fanconi anemia group M protein OS=Homo sapiens OX=9606 GN=FANCM PE=1 SV=2 - [FANCM_HUMAN]	0.44	1	1	1	24.51	1
Q9UGM5	Fetuin-B OS=Homo sapiens OX=9606 GN=FETUB PE=1 SV=2 - [FETUB_HUMAN]	10.47	4	2	2	244.06	22	1.04956	0.552544	1.45937	1.10254	1.19792	1.13429	0.53279	0.446106	0.634657	1.77915	1.88528	0.883899	0.673719	1.08801	0.607944	0.810953	1.34566	1.15526	0.666452	0.963651	0.717976	1.18921	1.21152	0.974399	0.76445	0.737538	0.867021	2.12989	0.820148	1.3883	0.779893	0.827083	0.719991	1.63459	0.919181	0.241663	0.735603	1.21489	0.577315	0.899864	2.56286	0.730003
P02671	Fibrinogen alpha chain OS=Homo sapiens OX=9606 GN=FGA PE=1 SV=2 - [FIBA_HUMAN]	41.11	3	32	32	4139.79	1005	0.933984	1.00762	0.737095	0.873856	1.08492	1.00194	1.03862	1.22482	1.07425	0.710828	0.953087	1.13409	0.822763	1.11468	0.847029	0.782209	1.02484	1.0934	0.777759	1.04226	1.45303	0.984752	1.74341	1.19338	0.791702	1.04552	0.998498	0.842664	0.94646	0.970484	0.852073	1.10218	1.0661	0.840645	0.900779	1.13712	0.87314	0.933769	0.943801	1.19978	1.04805	0.903245
P02675	Fibrinogen beta chain OS=Homo sapiens OX=9606 GN=FGB PE=1 SV=2 - [FIBB_HUMAN]	70.06	3	28	28	5111.63	1042	0.988133	1.0431	0.771485	0.806038	1.00618	1.12706	1.07397	1.32654	1.12246	0.711948	0.859775	1.18636	0.852044	1.23086	0.828354	0.768547	0.961785	0.921274	0.807659	0.98226	1.45529	0.991064	1.58398	1.16392	0.811263	1.04068	0.939217	0.887663	0.842166	1.15064	0.93735	1.07476	1.07471	0.876899	0.871442	1.07094	0.818353	0.899662	0.919356	1.09137	0.98441	0.854538
P02679	Fibrinogen gamma chain OS=Homo sapiens OX=9606 GN=FGG PE=1 SV=3 - [FIBG_HUMAN]	67.11	5	24	24	3756.93	802	0.989486	1.03201	0.717212	0.869081	1.04223	1.06781	1.07359	1.18147	1.02846	0.718745	0.941773	1.17134	0.834428	1.08907	0.797976	0.799109	0.983132	0.969138	0.825878	1.01278	1.39385	0.945228	1.58479	1.19721	0.822065	0.974938	0.971861	0.880124	0.923151	0.967859	0.900103	1.09769	1.05187	0.872211	0.898933	1.19626	0.887998	0.852154	0.904489	1.13944	0.92558	0.875775
P02751	Fibronectin OS=Homo sapiens OX=9606 GN=FN1 PE=1 SV=5 - [FINC_HUMAN]	29.92	3	48	48	3282.99	696	0.97441	1.23653	0.834294	1.04759	1.15194	1.06067	1.17349	2.6531	2.4362	0.743558	0.976982	1.30501	0.838404	0.934934	0.744951	0.75428	0.885253	1.11341	0.859465	0.917374	0.975665	1.09803	2.81903	1.01962	0.886726	0.896072	0.947724	0.856742	0.793685	0.829541	1.08418	1.08819	1.13188	0.606235	0.687891	0.646063	0.838317	0.753946	0.943312	1.01057	1.12645	0.720767
O75636	Ficolin-3 OS=Homo sapiens OX=9606 GN=FCN3 PE=1 SV=2 - [FCN3_HUMAN]	9.7	1	1	1	23.64	1			1.61723						1.11472						1.69789						1.68586						1.67076						1.24515						1.2349
Q08380	Galectin-3-binding protein OS=Homo sapiens OX=9606 GN=LGALS3BP PE=1 SV=1 - [LG3BP_HUMAN]	2.22	1	1	1	33.78	1	0.562322						0.465172						0.593549						0.852704						0.674684						0.430989						1.45819
A0A0A0MS51	Gelsolin OS=Homo sapiens OX=9606 GN=GSN PE=1 SV=1 - [A0A0A0MS51_HUMAN]	23.8	5	4	13	770.38	133	0.975369	1.13411	1.07633	1.00062	0.938057	1.12398	1.00574	1.06629	1.14128	0.886387	0.929292	1.00478	0.948747	1.02507	1.04642	0.987498	0.941911	0.923434	1.04199	0.962582	1.0757	1.05565	0.974175	0.70496	1.01705	0.869764	1.11245	0.966394	1.18312	0.943414	0.930268	1.12703	1.27815	1.02582	1.31322	0.928454	1.01801	1.07004	1.1298	0.857112	1.05303	0.860665
H0YBE4	Glutathione peroxidase 3 (Fragment) OS=Homo sapiens OX=9606 GN=GPX3 PE=1 SV=1 - [H0YBE4_HUMAN]	21.52	3	1	1	36.86	5	1.30488	1.25611	0.915873		0.809042		1.1775	1.04881	1.40678		0.829643		0.912282	1.18245	1.35589		1.16358		1.19911	0.901984	0.929235		1.01439		1.2124	0.835547	0.969164		1.08524		1.24246	1.15563	1.09795		1.34914		1.15923	0.839442	1.15037		1.11087
D6REM1	Golgi phosphoprotein 3 OS=Homo sapiens OX=9606 GN=GOLPH3 PE=1 SV=1 - [D6REM1_HUMAN]	8.6	2	1	1	24.97	1
P00738	Haptoglobin OS=Homo sapiens OX=9606 GN=HP PE=1 SV=1 - [HPT_HUMAN]	65.27	11	13	26	4452.81	999	1.06655	0.661412	0.850052	0.967522	1.21348	1.07302	1.02664	0.718917	1.00395	1.02637	1.17319	1.38427	0.83516	0.8859	1.12745	0.803365	1.02558	1.44474	0.833734	0.937776	1.9636	0.801732	1.18249	1.33222	0.963462	1.24059	0.626885	1.07837	1.31278	1	1.28248	1.01571	0.878682	1.24851	1.59468	1.1189	0.513139	1.05877	0.740287	1.67957	0.742655	1.02909
P00739	Haptoglobin-related protein OS=Homo sapiens OX=9606 GN=HPR PE=2 SV=2 - [HPTR_HUMAN]	52.59	3	5	18	2074.87	510	1.62443	0.732792	0.910775	1.83192	0.815817	0.736719	1.59795	0.791093	1.11472	1.60585	1.33894	0.719807	1.42845	1.19959	1.25748	0.616594	1.29553	1.52314	1.30274	1.02886	1.31525	0.57612	1.30984	1.34333	0.864256	1.00279	1.07243	1.27166	2.00056	0.578361	0.747616	0.802995	0.922964	1.47227	1.87578	0.716662	0.833813	0.926438	1.3469	1.30054	2.42226	1.09037
P69905	Hemoglobin subunit alpha OS=Homo sapiens OX=9606 GN=HBA1 PE=1 SV=2 - [HBA_HUMAN]	57.04	5	7	7	681.387	149	0.823898	0.852982	1.24483	0.987566	0.966836	0.824217	2.70568	1.12229	1.18189	3.27023	0.714057	0.63035	0.800303	0.654173	0.863497	0.391274	1.29786	0.908176	1.36631	0.766426	1.17136	0.859423	0.908054	0.64079	1.04135	0.752464	0.857993	0.863174	1.27403	0.906731	0.737225	0.896886	0.680541	1.2653	0.758948	0.929323	0.741256	0.874058	1.5112	1.29394	0.831645	1.41129
P68871	Hemoglobin subunit beta OS=Homo sapiens OX=9606 GN=HBB PE=1 SV=2 - [HBB_HUMAN]	93.2	14	11	11	1899.68	252	0.801646	1.38531	1.18432	1.00851	0.873897	0.710262	2.71513	1.03103	1.33725	4.3415	0.790141	0.510426	0.51856	0.808411	1.08198	0.325919	1.26736	0.94533	2.08576	0.688453	1.18807	0.821541	0.927415	0.575965	1.25578	0.756196	0.745493	0.993243	1.21276	0.787208	0.908697	0.747346	0.847013	1.34594	0.777253	0.771674	1.03374	0.984999	1.35195	1.90511	0.570794	1.12477
P02790	Hemopexin OS=Homo sapiens OX=9606 GN=HPX PE=1 SV=2 - [HEMO_HUMAN]	51.52	8	20	20	3307.18	691	1.17748	0.951397	1.01194	1.00602	1.05646	1.1034	1.14723	0.912501	0.987831	1.12518	1.09791	1.04877	0.965369	1.00628	1.22615	1.06392	1.11357	1.03139	1.07983	1.04121	0.992468	1.08946	1.18847	1.01595	0.766259	1.09785	1.00567	0.973714	1.04154	1.19896	0.852219	1.01346	0.944406	0.985183	1.16094	1.08545	0.984143	0.923813	0.947541	1.03803	0.948974	1.05692
P05546	Heparin cofactor 2 OS=Homo sapiens OX=9606 GN=SERPIND1 PE=1 SV=3 - [HEP2_HUMAN]	32.26	1	12	12	904.413	197	1.3306	0.899791	1.1258	1.10235	1.09741	0.947038	1.2871	0.794607	1.06075	0.967657	1.2125	1.1031	1.14664	0.877591	1.04339	1.04665	1.02256	1.09031	1.04867	0.927	1.08464	0.959351	0.883175	1.20485	1.07515	1.01231	0.882551	1.18432	0.890992	0.875327	1.17995	0.946623	0.840087	1.12911	0.891827	1.00123	0.731243	0.883251	1.01616	1.1828	0.894068	1.13289
P04196	Histidine-rich glycoprotein OS=Homo sapiens OX=9606 GN=HRG PE=1 SV=1 - [HRG_HUMAN]	22.67	1	12	12	1047.89	215	1.15309	1.34039	1.0431	0.980896	0.803174	0.953105	1.14145	1.38036	1.17655	1.18661	0.853269	0.843248	0.885437	1	1.54562	0.880796	1.23895	0.999888	0.935354	1.0704	1.13942	0.959887	1.14114	0.839347	0.960757	1.2282	0.946013	0.949076	0.983643	1.17805	0.878557	1.0287	0.86587	1.0392	1.17731	0.938332	1.23636	0.838953	1.11861	0.778171	1.28491	1.17052
P42858	Huntingtin OS=Homo sapiens OX=9606 GN=HTT PE=1 SV=2 - [HD_HUMAN]	0.73	1	1	1	20.63	1			1.61723						1.11472						1.72477						0.444281						1.07243						1.27815						0.711254
Q14520	Hyaluronan-binding protein 2 OS=Homo sapiens OX=9606 GN=HABP2 PE=1 SV=1 - [HABP2_HUMAN]	3.21	1	1	1	93.79	13	1.30084	0.833111	2.07615	1.10864	1.18559	0.664289	1.36723	0.778552	1.36695	1.14896	0.580048	0.560452	1.24402	0.834903	1.09358	1.19074	1.63075	0.718891	0.81821	1.1216	0.914465	0.774281	0.878711	0.551727	1.10489	0.790267	0.903966	1.25689	0.759545	1.26567	1.82486	0.960533	1.21673	0.771178	0.711699	0.260781	1.29049	0.665017	1.38108	0.85786	0.704522	0.556852
Q4G0P3	Hydrocephalus-inducing protein homolog OS=Homo sapiens OX=9606 GN=HYDIN PE=1 SV=3 - [HYDIN_HUMAN]	0.37	1	1	1	23.2	1
A0A0J9YY99	Ig-like domain-containing protein (Fragment) OS=Homo sapiens OX=9606 PE=1 SV=1 - [A0A0J9YY99_HUMAN]	32.48	3	3	4	384.539	89	0.855195	0.892385	0.602319	0.906866	0.651133	1.05638	0.924688	0.817057	0.505031	0.78527	0.575279	1.11494	1.10403	0.909509	0.840134	0.858932	1.29486	0.937862	0.856162	0.919088	0.808014	0.795505	1.13828	1.14712	1.04611	0.860461	1.24185	0.964696	1.51438	1.01002	0.969934	0.964417	0.8985	1.02255	1.0759	1.18926	0.863752	0.920544	0.944526	1.06843	1.08494	0.665218
P01876	Immunoglobulin heavy constant alpha 1 OS=Homo sapiens OX=9606 GN=IGHA1 PE=1 SV=2 - [IGHA1_HUMAN]	47.88	2	8	14	2614.62	500	0.891517	1.44941	0.962684	1.42602	0.653929	0.653888	0.989283	1.34433	1.06	1.22852	0.585342	0.745494	1.43159	0.739655	1.19115	0.804032	0.788658	1.66146	1.35763	0.667183	1.50472	0.751013	0.748884	1.30497	0.839865	0.930968	1.68186	0.62038	0.639044	0.686989	0.781971	1.04393	1.68863	0.694737	0.604045	0.7646	1.73957	1.15737	0.743733	0.791407	0.751546	0.277306
P01877	Immunoglobulin heavy constant alpha 2 OS=Homo sapiens OX=9606 GN=IGHA2 PE=1 SV=4 - [IGHA2_HUMAN]	42.06	2	3	9	839.041	236	0.726567	1.00375	0.751747	1.47411	0.499805	0.615321	0.805933	1.08908	0.667954	1.33982	0.518498	0.496882	1.26824	0.383709	1.30499	0.222105	0.518116	2.76855	1.08455	0.360095	1.47849	0.203101	0.526234	2.0345	0.974472	0.962795	2.77906	0.485895	1.50341	0.40716	0.8003	1.0839	2.97583	0.437913	1.30721	0.48491	1.47889	1.12805	1.06231	1.30114	0.744497	0.6231
P01880	Immunoglobulin heavy constant delta OS=Homo sapiens OX=9606 GN=IGHD PE=1 SV=3 - [IGHD_HUMAN]	10.16	2	2	2	145.21	18	1.30481	1.21221	2.01215		0.901562	0.937981	0.973397	0.821467	1.02297		0.717918	0.882738	0.780027	0.839098	1.10709		1.95481	0.503507	0.449947	0.656196	1.17885		2.06741	0.578427	1.63239	0.495344	0.831912		1.45119	0.954267	1.95223	1.16233	0.541679		1.87873	0.773951	1.32821	0.941858	1.23332		1.51867	0.854377
P01857	Immunoglobulin heavy constant gamma 1 OS=Homo sapiens OX=9606 GN=IGHG1 PE=1 SV=1 - [IGHG1_HUMAN]	62.73	3	7	16	7068.68	1330	0.991308	1.92314	1.13949	0.850147	1.18483	0.586627	0.849601	1.77236	1.25378	0.664702	1.15101	0.961004	0.703778	1.50149	1.00194	1.03731	0.743986	0.759537	0.595206	1.3232	1.1198	1.02069	0.736606	0.729469	1.09776	0.86811	1.18947	0.806289	1.15937	0.749347	1.10773	0.71383	1.26962	0.821751	0.982243	0.967351	1.13327	0.990246	0.966754	0.792337	0.923891	0.682564
P01859	Immunoglobulin heavy constant gamma 2 OS=Homo sapiens OX=9606 GN=IGHG2 PE=1 SV=2 - [IGHG2_HUMAN]	57.06	2	5	13	4146.11	814	0.924415	1.4618	0.988465	1.10707	1.16645	0.846552	0.774877	1.32028	1.07439	0.950441	1.2901	1.28007	1.19628	0.691658	0.733039	0.834412	0.686684	0.88846	0.995801	0.665559	0.805247	0.813121	0.802347	0.831981	0.630305	0.865463	1.0928	1.05074	0.588108	0.726951	0.536061	0.966002	1.0847	0.994031	0.595536	0.776829	1.4736	1.28473	0.859448	1.46203	0.928749	0.514723
A0A4W9A917	Immunoglobulin heavy constant gamma 3 (Fragment) OS=Homo sapiens OX=9606 GN=IGHG3 PE=1 SV=1 - [A0A4W9A917_HUMAN]	49.07	3	5	15	3839.97	787	0.822154	0.633166	0.713423	0.591829	1.6984	1.20374	0.734519	0.664904	0.814144	0.470217	1.85655	1.4824	1.07113	1.1044	0.69678	0.772848	1.26746	0.935998	0.960435	0.915772	0.778013	0.779375	1.35822	0.846304	1.50356	0.774226	0.379394	1.48478	2.07895	1.57946	1.1207	0.698357	0.450903	1.64163	1.79525	1.40826	2.63347	1.11227	0.559204	0.365767	0.538454	0.403388
P01861	Immunoglobulin heavy constant gamma 4 OS=Homo sapiens OX=9606 GN=IGHG4 PE=1 SV=1 - [IGHG4_HUMAN]	67.89	2	7	14	2912.99	569	1.16894	0.868426	0.993142	1.6542	0.864877	0.685447	1.24662	0.760077	1.17958	1.59606	0.929048	0.766326	0.559589	1.12939	0.683846	1.08764	0.654614	0.50485	0.463075	0.985169	0.629271	1.10023	0.59574	0.485303	2.81327	1.34965	0.909957	1.22005	0.441827	1.30352	2.9172	1.70813	0.910473	1.2536	0.410598	1.54837	1.34512	0.80461	1.70121	0.494193	1.10883	0.315201
P01871	Immunoglobulin heavy constant mu OS=Homo sapiens OX=9606 GN=IGHM PE=1 SV=4 - [IGHM_HUMAN]	57.84	1	19	19	3229.68	539	0.624227	0.671675	0.850982	1.21144	0.467585	1.82025	0.679337	0.731099	0.907965	1	0.488241	2.36211	0.730587	1.05522	0.571016	0.573632	0.854728	1.12258	0.575562	0.96194	0.637338	0.569816	0.819242	1.14069	1.06953	1.10925	0.813652	1.02642	1.21947	0.77037	1.19811	1.16053	0.784989	0.931787	1.06194	0.874679	0.418664	1.19394	1.38012	1.97683	0.808874	0.614264
A0A075B7D0	Immunoglobulin heavy variable 1/OR15-1 (non-functional) (Fragment) OS=Homo sapiens OX=9606 GN=IGHV1OR15-1 PE=1 SV=1 - [A0A075B7D0_HUMAN]	10.26	1	1	1	24.82	1					1.50491						2.09249						0.744711						1.07032						1.35508						1.21327						0.43514
A0A0C4DH31	Immunoglobulin heavy variable 1-18 OS=Homo sapiens OX=9606 GN=IGHV1-18 PE=3 SV=1 - [HV118_HUMAN]	9.4	2	1	1	111.563	18	1.0356	1.16176	1.17645	0.933562	1.26239	1.26764	1.07065	0.96259	1.05348	0.812986	1.40438	1.22138	0.948235	1.13081	1.11173	1.10727	0.593232	0.97044	0.804308	1.17978	1.02908	1.07774	0.566321	1.26161	1.80905	0.709909	1.14933	0.98943	0.911483	0.719236	1.73052	0.856618	1.05156	0.965068	0.853154	0.858375	1.022	1.25697	0.76497	0.644437	0.96009	0.643108
P01742	Immunoglobulin heavy variable 1-69 OS=Homo sapiens OX=9606 GN=IGHV1-69 PE=1 SV=2 - [HV169_HUMAN]	15.38	5	2	2	132.57	23	1.56872	1.09402	1.02102	0.886999	1.05332	1.18364	1.81213	1.04449	0.952185	0.858139	1.18678	1.38412	0.598732	1.21069	0.739857	1.04389	0.811595	0.901356	0.386543	1.22795	0.73246	0.95778	0.676571	1.12449	1.53711	0.866698	1.10795	1.2285	0.71848	1.03491	1.71144	0.996436	0.994352	1.33095	0.815991	1.47452	0.990348	0.821273	0.821464	0.887353	0.859032	0.532554
A0A075B7B8	Immunoglobulin heavy variable 3/OR16-12 (non-functional) (Fragment) OS=Homo sapiens OX=9606 GN=IGHV3OR16-12 PE=1 SV=1 - [A0A075B7B8_HUMAN]	18.8	1	1	2	200.351	47	0.765383	0.922613	1.30031	1	0.898926	1.16605	0.999391	0.994724	0.840454	0.862751	0.905885	1.23561	1.10653	0.845181	0.694858	0.929879	0.871106	1.0146	0.874942	0.815659	0.646694	0.856688	0.852722	1.02405	1.17108	0.801539	1.44141	1.09473	1.10489	0.889888	1.0826	0.977117	1.16964	1.06344	1.03184	1.16703	0.977605	1.32627	0.719039	1.1023	0.78317	0.568684
S4R460	Immunoglobulin heavy variable 3/OR16-9 (non-functional) OS=Homo sapiens OX=9606 GN=IGHV3OR16-9 PE=1 SV=2 - [S4R460_HUMAN]	31.25	7	1	2	376.85	55	0.780145	0.793537	0.819745	0.74393	0.841239	1.18022	0.752589	0.856145	0.771669	1.04035	0.770266	1.09852	0.93126	1.06033	0.589869	0.777493	1.12621	1.45249	0.797048	0.989349	0.565986	0.696346	0.857942	1.18981	0.947253	0.853276	0.872452	0.873554	0.968874	1.28353	0.744942	0.917672	0.835971	0.870803	0.908864	0.941107	0.862496	1.20803	0.905724	1.00683	1.26392	0.98365
A0A0A0MS15	Immunoglobulin heavy variable 3-49 OS=Homo sapiens OX=9606 GN=IGHV3-49 PE=3 SV=1 - [HV349_HUMAN]	7.56	1	1	1	77.64	18	0.924513	1.1137	1.59484	1.01371	0.968422	1.30382	1.03886	1.1929	1.42461	1.11696	0.989495	1.32779	1.26093	1.1421	1.07878	1.06136	1.04742	0.892819	1.15649	1.03051	1.04288	0.969072	1.11153	1.12807	1.19574	0.513833	0.728737	0.91011	1.57235	1.22512	1.42861	0.792721	0.72277	0.890028	1.71784	1.02849	0.881144	0.986129	0.939649	0.757943	0.949421	0.610553
P01780	Immunoglobulin heavy variable 3-7 OS=Homo sapiens OX=9606 GN=IGHV3-7 PE=1 SV=2 - [HV307_HUMAN]	26.5	9	1	3	256.754	55	0.859198	0.702955	0.807846	0.708487	0.656983	1.11425	0.831915	0.694662	0.796808	0.658423	0.771591	1.21072	1.11793	0.824143	0.753955	0.863004	0.948093	1.58467	0.9839	0.754299	0.849217	0.88998	0.973873	1.98229	0.87961	0.807486	0.954748	0.822989	0.74622	1.01412	0.871654	0.888356	0.867638	0.943433	0.754633	0.979314	0.912237	1.39775	0.876687	1.13045	1.17302	0.823834
A0A0B4J1X5	Immunoglobulin heavy variable 3-74 OS=Homo sapiens OX=9606 GN=IGHV3-74 PE=3 SV=1 - [HV374_HUMAN]	24.79	5	1	3	226.037	63	0.83139	0.959936	0.776072	0.953417	1.01518	0.991171	0.930266	0.873586	0.721566	0.867459	1.12819	1.07779	0.741773	0.801516	0.938718	0.817054	0.762259	1.11073	0.670107	0.878798	0.880852	0.735482	0.804974	1.35599	1.12038	0.746508	1.06128	0.9469	0.92697	1.1126	1.11549	0.774185	1.01413	0.985388	0.851809	1.13222	0.954335	1.57814	1.39546	1.25075	0.899245	0.654536
P01782	Immunoglobulin heavy variable 3-9 OS=Homo sapiens OX=9606 GN=IGHV3-9 PE=1 SV=2 - [HV309_HUMAN]	34.75	6	2	3	574.091	61	0.8221	0.878227	0.97294	0.752905	1.01187	0.636436	0.837465	1.17032	0.955336	0.749473	1.07436	0.752939	1.35607	1.46975	0.886802	1.11341	1.01462	0.938829	1.19149	1.48246	1.06427	0.922444	1.06349	1.12574	1.43894	1.18488	1.39121	0.983814	1.04424	0.635629	1.72718	1.34915	1.32028	1.02278	1.00444	0.77068	1.29181	1.93173	0.987333	0.75425	0.774172	0.700688
P01825	Immunoglobulin heavy variable 4-59 OS=Homo sapiens OX=9606 GN=IGHV4-59 PE=1 SV=2 - [HV459_HUMAN]	13.79	10	1	1	264.183	33	1.32332	0.857182	0.826321	0.885095	1.11056	1.34317	1.00125	0.686939	0.882769	0.922668	1.26463	1.09182	1.38084	0.896271	0.841253	1.20458	1.01529	1.08537	0.934165	0.950352	0.892518	1.04838	0.897312	1.46608	1.17692	1.00802	1.04835	0.755184	1.10921	0.42145	1.87567	0.847062	1.04173	1.08022	0.965299	1.37251	0.855876	1.15207	0.959624	1.20854	1.2605	1.03851
A0A0C4DH38	Immunoglobulin heavy variable 5-51 OS=Homo sapiens OX=9606 GN=IGHV5-51 PE=3 SV=1 - [HV551_HUMAN]	35.9	2	3	3	376.133	45	0.779298	1.08981	0.801326	0.681512	0.763249	1.40248	0.686283	1.05361	0.925664	0.685392	0.953138	1.53126	0.718971	1.13562	3.94222	0.720849	0.891548	0.776558	0.753757	0.991798	3.55243	0.902306	0.835589	0.915669	1.33363	1.12781	0.757474	0.787194	0.802038	1.29751	1.32516	1.25629	1.0469	0.934286	0.975387	1.16324	1.18626	0.803293	0.744124	0.677657	0.635931	0.74179
A0A0B4J1U7	Immunoglobulin heavy variable 6-1 OS=Homo sapiens OX=9606 GN=IGHV6-1 PE=3 SV=1 - [HV601_HUMAN]	5.79	1	1	1	30.03	5		0.969243	1.4949	1.28362				1.1425	1.48938	1.17192				2.34588	1.09968	1.09816				2.32898	0.771862	1.19411				1.26454	1.07989	1.16667				1.03506	1.06818	0.80175				2.21928	1.22779	1.7591
D6RD17	Immunoglobulin J chain (Fragment) OS=Homo sapiens OX=9606 GN=JCHAIN PE=1 SV=8 - [D6RD17_HUMAN]	21.66	4	3	3	107.45	22	0.649246	0.772826	0.786491	1.10467	0.396234	1.14426	0.707557	0.730823	0.885655	0.915284	0.36141	1.54226	0.788561	0.814408	0.762924	0.787016	0.884323	1.04476	0.766058	0.878695	0.787835	0.781727	1.00403	0.988315	0.902888	1.23705	0.944893	0.903412	0.78175	0.54191	0.945025	1.19237	1.05235	1.08601	0.961067	0.571518	0.834899	1.03819	0.974645	1.6301	0.647193	0.607141
P01834	Immunoglobulin kappa constant OS=Homo sapiens OX=9606 GN=IGKC PE=1 SV=2 - [IGKC_HUMAN]	80.37	1	6	6	5174.47	650	0.836369	1.4299	1.07627	0.996802	1.10592	1.00479	0.817613	1.46004	1.10271	0.921755	1.18926	1.14979	0.944113	1.10856	0.872668	1.00947	0.752004	0.973621	0.833154	0.95298	1.0098	1.00638	0.775536	0.941322	1.12988	0.885878	1.28868	1.18555	0.835317	0.881394	1.08575	0.979262	1.17369	1.11353	0.767848	0.986883	1.3299	1.18969	0.93173	1.04869	0.936938	0.608651
A0A0A0MT89	Immunoglobulin kappa joining 1 OS=Homo sapiens OX=9606 GN=IGKJ1 PE=4 SV=2 - [KJ01_HUMAN]	66.67	1	1	1	26.13	1					1.15918						1.00785						0.835987						0.669805						0.656638						0.617126						0.828674
A0A2Q2TTZ9	Immunoglobulin kappa variable 1-33 OS=Homo sapiens OX=9606 GN=IGKV1D-33 PE=1 SV=1 - [A0A2Q2TTZ9_HUMAN]	31.48	2	2	2	635.027	85	0.897749	1.30897	0.766441	0.826268	1.09486	0.78308	0.88482	1.35278	0.975766	0.706638	1.14707	1.17656	0.919973	1.25223	0.899976	1.00838	0.988902	1.17367	0.781467	1.32003	0.881063	0.989369	0.911768	1.07515	1.36492	0.979824	1.12964	1.47936	0.932956	1.1008	1.28375	1.03911	1.18091	1.698	0.882626	1.15063	1.34806	1.22956	0.893259	0.88084	0.907866	0.717209
P01602	Immunoglobulin kappa variable 1-5 OS=Homo sapiens OX=9606 GN=IGKV1-5 PE=1 SV=2 - [KV105_HUMAN]	9.4	1	1	1	65.4767	18	1.20557	0.697665	0.759214	0.849808	0.660251	1.8795	0.988307	0.739333	0.749781	0.672976	0.49626	1.66879	0.418066	0.760148	0.778904	1.05033	0.956426	1.13158	0.44542	0.751077	0.897639	1.04328	0.873803	1.23634	0.624818	1.0679	0.837642	1.09464	0.98906	1.23237	0.59829	1.10505	0.983222	1.45807	0.994941	1.34142	0.71323	1.6941	0.879479	1.38104	0.907749	1.36042
A0A0B4J2D9	Immunoglobulin kappa variable 1D-13 OS=Homo sapiens OX=9606 GN=IGKV1D-13 PE=3 SV=1 - [KVD13_HUMAN]	13.68	1	1	1	64.39	2	0.710094						0.696944						2.09886						2.33143						3.98044						5.40375						0.902351
P06310	Immunoglobulin kappa variable 2-30 OS=Homo sapiens OX=9606 GN=IGKV2-30 PE=3 SV=2 - [KV230_HUMAN]	38.33	2	3	4	195.983	35	0.652956	0.391906	1.01102	1.04825	0.741226	1.1011	1.3513	0.585134	0.573672	1.51755	0.85859	0.905792	0.980857	0.635813	0.572427	0.993494	0.85411	1.35388	0.439619	0.725066	1.07497	0.809952	0.746976	1.14427	0.506673	0.813848	1.57712	0.509728	0.849961	0.446414	0.753448	0.780487	0.798545	0.919461	0.57641	0.87395	0.664246	0.73711	1.62959	0.663969	1.53833	0.799387
A0A087X0Q4	Immunoglobulin kappa variable 2-40 OS=Homo sapiens OX=9606 GN=IGKV2-40 PE=1 SV=1 - [A0A087X0Q4_HUMAN]	19.23	3	1	2	210.04	22		0.701493		0.638512		2.4822		1.75119		0.212663		0.676359		2.46548		1.26288		3.38571		0.681235		0.350055		0.155502		1.53121		2.09351		2.99277		0.664241		0.569693		0.486691		2.66065		1.94909		1.34225
P04433	Immunoglobulin kappa variable 3-11 OS=Homo sapiens OX=9606 GN=IGKV3-11 PE=1 SV=1 - [KV311_HUMAN]	40	3	2	3	87.2502	27	0.970083	0.921965	0.460147	0.955372	0.97289	0.972141	1.18919	0.987457	0.655983	0.860909	0.937848	1.14065	0.719019	0.938103	0.804877	0.825996	0.742946	0.865456	0.761157	0.836714	0.954646	1.03448	1.01386	1	1.14617	1.44104	1.10034	0.966142	0.758563	1.35056	1.29552	1.24438	1.17074	1.05593	0.848413	1.10438	1.00409	0.882876	1.00942	1.00543	1.25222	0.637759
P01624	Immunoglobulin kappa variable 3-15 OS=Homo sapiens OX=9606 GN=IGKV3-15 PE=1 SV=2 - [KV315_HUMAN]	13.91	5	1	2	72.2802	26	0.866691	1.42512	0.801005	0.713241	1.01494	0.861255	0.944681	1.38375	0.90836	0.6866	1.10467	1.01396	0.825699	0.934543	0.961911	0.872675	0.853518	0.894043	0.937249	0.936113	0.979492	1	0.875763	0.801066	1.02828	1.20691	1.31121	1.07335	0.761551	1.14888	1.13868	1.22114	1.31122	1.15477	0.748006	1.03415	1.17823	1.20934	1.03848	0.862734	0.750897	0.579516
P01619	Immunoglobulin kappa variable 3-20 OS=Homo sapiens OX=9606 GN=IGKV3-20 PE=1 SV=2 - [KV320_HUMAN]	27.59	1	1	4	444.333	74	1.05205	1.24472	0.886444	0.837699	0.767213	1	1.2156	1.33548	0.985449	0.775564	0.899028	1.34641	0.836801	0.818551	0.789095	0.894346	0.792053	1.09585	0.786095	0.779855	0.79748	0.930656	0.819644	1.10412	1.05163	1.01795	1.15844	1.35956	0.6604	1.27491	1.1677	1.04137	1.26858	1.32841	0.622268	1.2861	0.977577	1.31447	0.9008	0.909335	0.841796	0.465158
A0A0C4DH25	Immunoglobulin kappa variable 3D-20 OS=Homo sapiens OX=9606 GN=IGKV3D-20 PE=3 SV=1 - [KVD20_HUMAN]	27.59	1	1	4	443.437	67	0.729312	1.20604	0.56363	1.06531		0.86429	1.18096	1.27875	1.02523	1.2969		1.02333	0.801632	1.09243	0.861037	0.634737		1.02632	1.03651	0.985387	0.691858	0.823808		0.846782	1.14263	1.13368	1.04483	1.05948		1.07411	1.64532	1.27443	1.60146	1.53584		1.05018	1.33102	1.3913	0.953409	1.05608		0.525458
P06312	Immunoglobulin kappa variable 4-1 OS=Homo sapiens OX=9606 GN=IGKV4-1 PE=1 SV=1 - [KV401_HUMAN]	13.22	1	2	2	113.737	37	1.41503	1.48088	1.30546	0.910012	0.943679	1.16429	1.2873	1.24108	1.21741	1.06561	1.121	1.39624	1.05104	1.13882	0.890043	1.18766	1.0164	1.27787	0.778665	1.08747	0.724163	1.10474	0.993903	1.45821	1.25234	1.08496	1.51721	1.31658	0.824334	1.01628	1.21993	0.886113	1.26012	1.30284	0.800761	1.28118	1.07007	1.51715	1.06207	2.21049	1.14933	0.750675
P0DOY2	Immunoglobulin lambda constant 2 OS=Homo sapiens OX=9606 GN=IGLC2 PE=1 SV=1 - [IGLC2_HUMAN]	88.68	2	4	8	3414.1	583	0.714124	1.23723	1.28228	1.05302	1.08331	1.1252	0.915968	1.10602	0.990571	1.1922	1.10543	1	1.12708	1.00864	0.903681	0.967713	1.00444	0.945529	0.875099	1.07067	1.28821	1.03959	1.13875	0.97539	0.951485	0.845299	1.13311	0.754739	1.1871	1.0415	0.891289	1.25184	0.96111	0.788254	1.15522	1.00338	1.37739	1.008	1.03232	0.68115	1.22553	0.91796
P01699	Immunoglobulin lambda variable 1-44 OS=Homo sapiens OX=9606 GN=IGLV1-44 PE=1 SV=2 - [LV144_HUMAN]	13.68	2	1	1	21	1	0.38035						0.576606						1.1915						0.868857						1.93606						1.84074						1.05099
P01701	Immunoglobulin lambda variable 1-51 OS=Homo sapiens OX=9606 GN=IGLV1-51 PE=1 SV=2 - [LV151_HUMAN]	13.68	1	2	2	81.03	36	0.885574	0.77784	0.980941	0.753845	1.16542	1.69901	0.934217	0.828108	1.07897	0.82074	1.26861	1.76093	0.798985	1.04136	1.21421	1.64456	0.809233	1.14955	0.597727	1.13048	1.26025	1.71201	0.742408	1.14515	0.848971	1.27483	0.805716	0.6897	1.33521	0.763057	1.07832	1.19594	0.833184	0.705612	1.23254	0.903296	1.29406	1.06104	1.12574	0.836404	0.939027	0.807571
P01709	Immunoglobulin lambda variable 2-8 OS=Homo sapiens OX=9606 GN=IGLV2-8 PE=1 SV=2 - [LV208_HUMAN]	13.56	2	2	2	68.26	25	0.543216	0.526221	0.698101	1.26225	1.22402	1.25125	1.10919	1.21116	0.888542	1.42342	1.45795	1.03865	1.02386	0.527785	0.77585	0.981189	1.54977	1.11424	0.482875	0.912147	0.990608	1.06091	1.47823	1.51556	0.714874	1.06901	1.07261	0.626382	1.37507	0.549125	0.769927	1.48064	0.855885	0.973664	1.13125	0.935055	0.767661	0.703599	0.918586	0.875696	1.06541	0.578958
A0A075B6K4	Immunoglobulin lambda variable 3-10 OS=Homo sapiens OX=9606 GN=IGLV3-10 PE=3 SV=2 - [LV310_HUMAN]	13.91	2	2	2	55.7682	20	0.497831	1.19942	1.21497	1.19201	1.56961	1.00493	1.04125	2.30516	1.79958	2.00865	3.27751	1.2179	1.78856	1.42908	3.53593	3.31448	3.00054	1.33529	1.30739	1.01966	1.33395	1.69683	1.65496	0.857183	1.41298	1.70743	1.73654	0.999452	1.39691	0.957271	1.05813	1.21246	1.36605	0.66208	1.16431	2.36929	1.14325	0.865808	0.982716	0.724393	1.49194	0.905001
P01714	Immunoglobulin lambda variable 3-19 OS=Homo sapiens OX=9606 GN=IGLV3-19 PE=1 SV=2 - [LV319_HUMAN]	16.96	1	2	2	90.7133	19	0.999944	0.807572	1.65345	0.649893	1.26138	0.9431	0.876508	0.789844	1.60583	0.564171	1.22931	1.03739	1.03952	0.955329	0.817801	1.3203	0.667546	0.883165	0.928758	0.946112	0.904301	1.39472	0.706088	0.692097	0.725361	0.917314	1.12711	0.789762	1.01626	0.677832	0.747267	1.03951	1.06875	0.854076	1.02445	0.893591	0.948469	1.27598	0.807705	1.05547	1.25993	1.10498
A0A075B6K5	Immunoglobulin lambda variable 3-9 OS=Homo sapiens OX=9606 GN=IGLV3-9 PE=3 SV=1 - [LV39_HUMAN]	13.91	2	1	1	193.183	18	0.825656	1.18067	0.568041	0.888314	0.586967	0.57297	0.691338	0.904868	0.580152	0.631653	0.716246	0.834011	1.36769	1.24947	1.00979	1.22402	0.614362	1.19262	1.19168	1.04913	1.102	1.16973	0.918782	0.845844	1.60155	0.990545	1.16875	0.633367	0.793636	1.8173	1.76016	0.689127	1.2432	0.73126	0.766784	2.32476	1.26791	1.50549	1.04612	0.693382	1.13092	0.563739
A0A075B6H9	Immunoglobulin lambda variable 4-69 OS=Homo sapiens OX=9606 GN=IGLV4-69 PE=1 SV=1 - [LV469_HUMAN]	14.29	3	2	2	72.35	30	1.26894	0.737065	0.934768	1.03504	0.81698	1.58022	1.80338	0.831827	1.06771	0.910461	0.826819	1.94904	1.02099	0.915588	0.833588	0.98716	0.730904	0.60568	0.600425	1.30779	1.01393	0.968108	0.760216	0.853621	0.965985	1.04728	1.06778	0.410911	1.30228	1.07915	1.06549	1.08522	0.958845	0.536452	1.05085	1.60176	0.889955	0.951663	1.16644	0.595046	1.28499	0.735371
P15814	Immunoglobulin lambda-like polypeptide 1 OS=Homo sapiens OX=9606 GN=IGLL1 PE=1 SV=1 - [IGLL1_HUMAN]	10.8	1	2	2	120.02	10		0.562245	0.719825	1.24485	1.05021			0.985021	0.970986	2.54968	1.7244			0.502344	0.546636	0.832532	0.882225			0.81168	0.691487	1.3026	1.56973			0.777857	0.64181	2.40577	1.54839			1.04031	0.348134	3.54684	0.929615			0.474686	0.882618	2.56571	0.785173
B9A064	Immunoglobulin lambda-like polypeptide 5 OS=Homo sapiens OX=9606 GN=IGLL5 PE=2 SV=2 - [IGLL5_HUMAN]	42.99	3	3	7	2808.79	421	0.816781	1.12478	0.966141	0.81347	0.944845	0.809259	0.905257	1.20885	1.02735	0.802218	0.898194	0.864812	0.982051	0.985659	0.555095	0.812018	0.767883	1.28125	0.919853	0.966908	0.89389	1.1036	0.792058	1.01231	0.811677	0.652509	0.973906	1.0753	0.938158	0.80145	0.75521	0.764099	0.997248	1.04851	0.934279	0.824231	1.11221	0.962061	0.887693	1.07667	0.915011	0.622483
P35858	Insulin-like growth factor-binding protein complex acid labile subunit OS=Homo sapiens OX=9606 GN=IGFALS PE=1 SV=1 - [ALS_HUMAN]	2.64	1	1	1	99.6267	6	1.47745	0.668865				1.77148	1.18711	0.786957				0.689032	0.943054	1.70962				0.838858	1.55575	0.665559				0.648927	0.966656	1.25068				1.57171	1.9154	0.440032				1.15082	0.559944	0.733437				1.12601
P19827	Inter-alpha-trypsin inhibitor heavy chain H1 OS=Homo sapiens OX=9606 GN=ITIH1 PE=1 SV=3 - [ITIH1_HUMAN]	26.56	4	16	16	1401.74	265	1.10016	1.08437	1.00348	1.07448	1.09014	0.843849	1.08549	1.04829	0.940363	0.884793	1.00565	0.974006	1.18452	0.904877	1.0147	0.899713	1.00123	0.80935	1.03296	0.849401	1.12046	0.993825	0.896011	0.978661	0.97873	0.884684	0.831904	1.04401	1.12095	0.998012	1.02307	1.05092	0.850923	0.942994	1.10091	1.03748	1.0403	0.955436	1.03668	1.09797	1.15105	0.867065
Q5T985	Inter-alpha-trypsin inhibitor heavy chain H2 OS=Homo sapiens OX=9606 GN=ITIH2 PE=1 SV=1 - [Q5T985_HUMAN]	23.1	4	17	17	1319.35	325	1.00006	1.10182	0.91099	1.01376	0.935576	0.930424	1.07731	1.03714	0.861894	0.790608	0.94278	1.03335	1.15132	0.893539	0.906589	0.97962	0.988339	0.902132	0.790411	0.891177	1.0027	0.975885	0.950641	0.984469	0.955674	0.899559	1.00543	0.81016	1.0203	0.719812	0.850273	0.988193	0.92546	0.909576	0.938906	1.00478	0.894353	0.940542	1.19759	1.01581	0.871884	0.934013
A0A087WW43	Inter-alpha-trypsin inhibitor heavy chain H3 OS=Homo sapiens OX=9606 GN=ITIH3 PE=1 SV=1 - [A0A087WW43_HUMAN]	7.76	3	3	3	481.604	66	1.14168	1.0088	0.61799	0.94582	0.78317	0.95231	1.05689	0.859349	0.622682	1.1127	0.83306	1.05472	0.842752	1.16099	1.06511	1.25054	0.999868	1.00485	0.797858	1.08521	1.29414	1.15584	1.03267	1.385	0.803138	0.998284	0.949012	0.759792	0.673747	0.816423	1.04012	0.860297	1.10872	0.830388	0.929646	0.791853	1.07201	0.783027	0.964008	0.956811	1.03378	1.06445
Q14624	Inter-alpha-trypsin inhibitor heavy chain H4 OS=Homo sapiens OX=9606 GN=ITIH4 PE=1 SV=4 - [ITIH4_HUMAN]	39.35	4	26	26	1752.66	416	1.11067	0.961581	0.921531	1.08573	1.05993	1.26607	1.14391	0.904664	0.905237	1.02053	1.17278	1.20157	1.01551	1.03167	0.925535	1.06049	1.16928	0.934878	0.957525	1.06239	1.08388	1.02444	1.02391	1.05044	1.0292	0.966805	1.07243	1.03961	0.764933	0.970195	1.07265	1.09698	1.02699	0.995841	0.869034	1.1026	0.925753	0.86221	1.12009	1.06045	1.19932	1.09224
M0QZG1	Izumo sperm-egg fusion protein 2 (Fragment) OS=Homo sapiens OX=9606 GN=IZUMO2 PE=1 SV=1 - [M0QZG1_HUMAN]	34.41	1	1	1	20.07	1
F5H1J3	Kelch-like protein 1 OS=Homo sapiens OX=9606 GN=KLHL1 PE=4 SV=2 - [F5H1J3_HUMAN]	3.49	2	1	1	21.88	1			2.23591						0.0383655						0.137215						0.83711						1.47078						0.0659139						1.02555
O15066	Kinesin-like protein KIF3B OS=Homo sapiens OX=9606 GN=KIF3B PE=1 SV=1 - [KIF3B_HUMAN]	0.94	1	1	1	23.31	1
P01042	Kininogen-1 OS=Homo sapiens OX=9606 GN=KNG1 PE=1 SV=2 - [KNG1_HUMAN]	31.06	4	19	19	1674.59	337	0.984289	1.00246	0.961574	1.07874	0.910179	0.890213	1.05432	0.97823	0.924349	1.22405	0.897443	0.934737	0.895352	1.02921	1.06993	0.952902	1.10348	1.08755	0.852402	1.14372	0.970473	0.887195	1.19306	0.975639	0.940213	1.16564	0.960638	0.904409	1.054	1.01317	0.89554	1.03743	0.849394	0.974151	1.05707	1.01915	1.04013	0.969563	0.9981	0.892437	0.893226	1.19922
P02750	Leucine-rich alpha-2-glycoprotein OS=Homo sapiens OX=9606 GN=LRG1 PE=1 SV=2 - [A2GL_HUMAN]	11.53	1	3	3	192.107	23	0.579155	1.16615	0.569988	0.687722	0.837811	1.56139	0.675641	0.923722	1.12112	1.324	0.19549	1.92597	0.0803558	1.06642	2.32319	1.31054	0.923263	0.558708	0.139753	1.12067	2.64938	1.84694	1.44312	0.660735	0.801386	0.556766	0.0968613	1.63294	0.893573	1.32167	0.162404	0.604722	0.460378	1.33316	1.0199	1.60758	1.51022	1.84899	0.0709289	1.19385	1.05384	2.00853
G3V356	Leucine-rich repeat-containing protein 74A (Fragment) OS=Homo sapiens OX=9606 GN=LRRC74A PE=1 SV=1 - [G3V356_HUMAN]	9.03	3	1	1	23.73	1
P18428	Lipopolysaccharide-binding protein OS=Homo sapiens OX=9606 GN=LBP PE=1 SV=3 - [LBP_HUMAN]	3.95	1	1	1	194.3	14	1.52585	1.70042	1.52323	0.96868	0.353887	0.727202	0.889011	1.52193	1.13644	1.19034	0.77705	1.04117	1.40206	1.7718	0.660767	1.03524	0.641598	0.913818	1.52245	1.11865	1.02928	1.19117	1.12759	1.00444	1.3282	1.03091	1.10454	1.07318	0.949628	0.840552	1.30172	1.31991	1.40329	1.07084	1.49966	1.15737	1.34587	1.57294	1.02567	0.955964	0.860042	1.05182
P51884	Lumican OS=Homo sapiens OX=9606 GN=LUM PE=1 SV=2 - [LUM_HUMAN]	15.68	2	3	3	475.66	55	0.888844	1.72713	1.05428	0.793483	0.738857	0.7552	0.923017	1.30547	1.05309	1.07328	0.529389	1.24628	1.04681	1.07612	0.945263	0.979957	0.802733	0.947178	1.30138	1.09945	0.716134	0.920067	0.92717	0.812505	1.0979	1.30114	1.1082	1.02154	1.05411	0.757376	1.1354	0.930464	0.947864	0.928885	0.962628	0.829924	1.06884	1.04843	0.804113	0.666804	0.786894	1.04181
Q9UJQ1	Lysosome-associated membrane glycoprotein 5 OS=Homo sapiens OX=9606 GN=LAMP5 PE=1 SV=1 - [LAMP5_HUMAN]	2.5	1	1	1	21.19	2
J3KPI6	Mitogen-activated protein kinase kinase kinase OS=Homo sapiens OX=9606 GN=MAP3K9 PE=1 SV=1 - [J3KPI6_HUMAN]	0.74	2	1	1	27.8125	3
Q8N159	N-acetylglutamate synthase, mitochondrial OS=Homo sapiens OX=9606 GN=NAGS PE=1 SV=1 - [NAGS_HUMAN]	1.31	1	1	1	20.63	2	0.992924		1.33735				1.4758		1.11038				0.905318		0.837459				0.572741		1.11059				0.728653		1.59226				0.803394		1.06889				0.942942		1.32021
Q96PD5	N-acetylmuramoyl-L-alanine amidase OS=Homo sapiens OX=9606 GN=PGLYRP2 PE=1 SV=1 - [PGRP2_HUMAN]	12.33	3	3	3	130.7	19	1.49838	0.686145	1.47794		1.10592	3.10437	1.20393	1.2149	1.18574		1.88528	0.964694	0.913652	0.616261	1.42596		1.34566	1	1.50725	0.816417	0.64628		1.25463	1.07265	2.3546	1.38988	1.12218		0.835317	1.88477	2.15247	0.489007	1.20098		0.97735	0.645905	0.526649	0.73862	0.830374		2.58769	1.92942
A8MZB2	N-acetyltransferase 5 (ARD1 homolog, S. cerevisiae), isoform CRA_a OS=Homo sapiens OX=9606 GN=NAA20 PE=1 SV=1 - [A8MZB2_HUMAN]	4.22	2	1	1	23.19	1			1.00348						1.06764						1.27191						0.770707						0.901673						0.882482						0.949233
B4DLR8	NAD(P)H dehydrogenase [quinone] 1 OS=Homo sapiens OX=9606 GN=NQO1 PE=1 SV=1 - [B4DLR8_HUMAN]	4.95	3	1	1	20.97	1					1.24547						0.766793						1.12245						1.37035						1.11253						0.880838						1.08327
H7C1D7	N-glycosylase/DNA lyase (Fragment) OS=Homo sapiens OX=9606 GN=OGG1 PE=4 SV=1 - [H7C1D7_HUMAN]	5.47	1	1	1	20.44	1
A6NKB5	Pecanex-like protein 2 OS=Homo sapiens OX=9606 GN=PCNX2 PE=2 SV=3 - [PCX2_HUMAN]	0.98	1	1	1	21.91	3
B7Z8R2	Pentatricopeptide repeat-containing protein 2, mitochondrial OS=Homo sapiens OX=9606 GN=PTCD2 PE=1 SV=1 - [B7Z8R2_HUMAN]	4.97	2	1	1	48.42	10
P04180	Phosphatidylcholine-sterol acyltransferase OS=Homo sapiens OX=9606 GN=LCAT PE=1 SV=1 - [LCAT_HUMAN]	6.36	1	1	1	143.15	15	1.49255	0.686145	1.61723	0.70631	0.824341	3.10437	1.19924	2.09633	1.11472	1.22487	1.40526	1.19253	1.1601	0.578734	1.72477	1.13622	1.03589	0.983638	1.55575	0.600248	0.444281	1.18669	0.630656	1.0551	1.05101	1.39786	1.07243	1.54487	0.64303	1.88477	2.08255	0.491815	1.27815	0.831643	0.976357	1.66817	0.786764	0.753946	0.711254	0.632966	1.99201	1.92942
G3V171	Phosphatidylinositol 3,4,5-trisphosphate 3-phosphatase TPTE2 OS=Homo sapiens OX=9606 GN=TPTE2 PE=4 SV=1 - [G3V171_HUMAN]	3.26	2	1	1	22.78	2
H7C276	Phosphoinositide phospholipase C (Fragment) OS=Homo sapiens OX=9606 GN=PLCL2 PE=1 SV=1 - [H7C276_HUMAN]	0.99	2	1	1	25.15	2
P36955	Pigment epithelium-derived factor OS=Homo sapiens OX=9606 GN=SERPINF1 PE=1 SV=4 - [PEDF_HUMAN]	12.68	9	4	4	381.825	51	1.20762	0.900615	1.31472	1.21574	1.2061	1.03454	1.17719	0.856383	1.11458	1.3069	1.53456	1.18238	1.38182	0.92225	1.26969	1.23905	0.996409	0.857168	1.0431	1.00095	1.12304	1.0299	0.889643	0.876563	1.09999	0.761519	1.17975	1.29386	1.05918	1.40778	1.23524	0.861659	1.37396	1.10552	1.11203	1.12652	0.929749	1.0606	1.39238	0.871949	1.15133	1.21485
P03952	Plasma kallikrein OS=Homo sapiens OX=9606 GN=KLKB1 PE=1 SV=1 - [KLKB1_HUMAN]	6.27	5	4	4	169.617	25	1.07575	0.926379	1.09425	1.07511	0.84847	0.882375	0.990137	1.01644	0.936521	1.31585	0.984811	0.825452	1.16376	1.03255	0.873006	0.87922	0.863423	1.11923	1.11698	1.07909	0.9077	0.975532	0.911801	0.944072	0.948215	1.18709	0.798805	1.00337	0.766124	1.08903	1.04947	1.06927	0.778298	1.06069	1.05178	1.17192	0.809628	1.12798	0.909786	1.06099	0.675124	1.09348
P05155	Plasma protease C1 inhibitor OS=Homo sapiens OX=9606 GN=SERPING1 PE=1 SV=2 - [IC1_HUMAN]	31.6	4	13	13	991.634	208	1.22915	0.998746	1.11059	1.21098	1.06097	0.663202	1.1569	0.935615	0.966822	1.01693	1.12732	0.848296	1.06884	1.20832	1.20408	1.02253	1.05108	1.04798	1.0019	1.1991	1.35096	1.04492	1.04711	1.05163	0.85726	0.95383	0.973423	1.11672	1.1954	0.999527	0.778458	0.992191	0.976524	1.04058	1.08284	0.965676	0.941472	1.01843	1.00485	1.11708	1.1208	1.24504
G3V2M1	Plasma serine protease inhibitor (Fragment) OS=Homo sapiens OX=9606 GN=SERPINA5 PE=1 SV=1 - [G3V2M1_HUMAN]	7.36	2	1	1	32	1					1.88348						1.88528						1.34566						0.819242						0.835317						0.97735						2.58769
P00747	Plasminogen OS=Homo sapiens OX=9606 GN=PLG PE=1 SV=2 - [PLMN_HUMAN]	42.84	6	26	26	1556.13	335	0.973149	0.961609	1.0942	1.08133	0.987864	0.813683	0.91109	1.01706	1.12525	1.08291	1.0522	0.926731	0.995288	1.03143	0.999167	0.963181	1.02525	0.984945	0.977862	1.11097	0.9828	1.09615	1.11491	0.98708	0.906116	0.926274	0.958804	1.06553	1.07102	1.07766	0.923006	0.987448	0.944008	1.09054	1.07625	1.05707	1.01334	1.0327	1.06276	0.953132	0.825212	1
P02775	Platelet basic protein OS=Homo sapiens OX=9606 GN=PPBP PE=1 SV=3 - [CXCL7_HUMAN]	19.53	1	2	2	135.48	8			1.15274		0.698536	1.83951			0.784704		0.734264	1.97161			3.92557		1.58783	2.79272			1.99251		1.4557	2.29524			0.544141		0.745788	0.630306			0.716046		1.29874	0.508541			0.994891		1.00193	0.946524
O75051	Plexin-A2 OS=Homo sapiens OX=9606 GN=PLXNA2 PE=1 SV=4 - [PLXA2_HUMAN]	1.06	1	1	1	21.05	1
H0YFP6	Polyamine-modulated factor 1-binding protein 1 (Fragment) OS=Homo sapiens OX=9606 GN=PMFBP1 PE=1 SV=1 - [H0YFP6_HUMAN]	1.59	2	1	1	26.3567	10
A0A140T947	Pre-mRNA-splicing factor ATP-dependent RNA helicase DHX16 (Fragment) OS=Homo sapiens OX=9606 GN=DHX16 PE=1 SV=1 - [A0A140T947_HUMAN]	1.49	2	1	1	23.04	3
A0A0C4DH35	Probable non-functional immunoglobulin heavy variable 3-35 OS=Homo sapiens OX=9606 GN=IGHV3-35 PE=5 SV=1 - [HV335_HUMAN]	9.4	1	1	1	83.9535	14	0.844337	0.790342	0.421358	0.915997	1.07007	1.17876	0.945953	0.634141	0.529064	0.862875	1	1.22333	0.901879	0.660392	0.937809	1.21989	0.873905	0.820351	0.788375	0.716357	0.757933	1.14745	0.837719	1.11116	0.994256	0.593894	0.951291	0.848957	1.04651	1.21859	1.01235	0.675281	0.942277	0.911894	1.0318	1.14139	1.00002	0.94535	0.786378	2.50724	0.526091	0.575749
A0A075B6R9	Probable non-functional immunoglobulin kappa variable 2D-24 OS=Homo sapiens OX=9606 GN=IGKV2D-24 PE=5 SV=1 - [KVD24_HUMAN]	16.67	2	2	2	143.503	22	0.719002	0.895534	0.841594	0.783293	0.974908	0.782731	0.684531	0.804302	0.929468	0.72436	1.00545	1.07863	0.990715	0.900701	0.743425	1.24523	0.63673	0.995791	0.841554	0.969074	0.759928	1.22169	0.770828	1.08259	0.736067	0.625443	1.075	0.694416	0.768278	0.762211	0.782033	0.750403	1.13279	0.740577	0.612681	0.95839	0.877224	1.11062	1.07233	1.34259	0.80748	0.572081
Q5T1N2	Protein AKNAD1 OS=Homo sapiens OX=9606 GN=AKNAD1 PE=4 SV=1 - [Q5T1N2_HUMAN]	1.11	2	1	1	36.93	12
P02760	Protein AMBP OS=Homo sapiens OX=9606 GN=AMBP PE=1 SV=1 - [AMBP_HUMAN]	37.22	4	11	11	1064.91	200	1.03398	1	1.00422	1.03689	1	1.03804	1.09584	1.06326	1.03471	1.03674	1.20907	0.979982	1.02461	0.924896	1.12079	0.976385	0.940642	0.96328	0.942769	0.875282	1.12393	1.01562	1.00815	0.985488	0.999736	0.944384	0.927955	1.07171	1.02037	0.928678	0.925258	0.960271	0.971849	1.03953	0.966493	0.925937	1.02797	0.966442	1.11896	1.05289	0.990027	0.96059
P30101	Protein disulfide-isomerase A3 OS=Homo sapiens OX=9606 GN=PDIA3 PE=1 SV=4 - [PDIA3_HUMAN]	1.58	1	1	1	29.47	10
A3KN83	Protein strawberry notch homolog 1 OS=Homo sapiens OX=9606 GN=SBNO1 PE=1 SV=1 - [SBNO1_HUMAN]	0.5	1	1	1	27.04	5
Q9UK55	Protein Z-dependent protease inhibitor OS=Homo sapiens OX=9606 GN=SERPINA10 PE=1 SV=1 - [ZPI_HUMAN]	4.28	2	1	1	144.67	9	1.06087	0.953551	0.805345	0.906967		0.739223	1.19893	0.899645	0.943916	0.973533		0.733244	1.41957	1.22854	1.23094	1.47308		0.745554	1.25617	1.06208	1.22196	0.95223		0.751238	1.05554	0.927394	0.924017	1.3415		1.65051	1.32926	1.08284	1.01543	1.46783		0.82411	1.24272	0.999027	1.04831	1.15265		0.977309
P00734	Prothrombin OS=Homo sapiens OX=9606 GN=F2 PE=1 SV=2 - [THRB_HUMAN]	40.19	4	18	18	1278.06	257	1.11886	0.999816	0.90556	1.1103	0.884968	0.953477	1.03929	0.949521	0.976837	1.03471	0.754586	1.04859	0.913616	0.945633	1.15353	0.90645	0.824221	0.998951	0.990403	0.92624	1.22113	0.973906	0.903202	0.896344	1.09518	0.980581	0.898388	0.933459	1.01944	0.947518	1.09335	0.908652	1.00571	0.946154	1.05257	0.990158	0.913187	0.872842	1.00716	1.10697	0.963397	0.991421
K7EPT2	Rabankyrin-5 (Fragment) OS=Homo sapiens OX=9606 GN=ANKFY1 PE=1 SV=1 - [K7EPT2_HUMAN]	10	1	1	1	23.05	2
Q13546	Receptor-interacting serine/threonine-protein kinase 1 OS=Homo sapiens OX=9606 GN=RIPK1 PE=1 SV=3 - [RIPK1_HUMAN]	3.28	1	1	1	28.75	3
Q5VY30	Retinol-binding protein OS=Homo sapiens OX=9606 GN=RBP4 PE=1 SV=2 - [Q5VY30_HUMAN]	55.28	2	7	7	884.826	144	1.2825	1.18305	1.20032	1.04419	1.09099	0.728696	1.20393	1.25834	1.29232	1.48898	1.11556	0.894499	0.829707	0.835278	1.42883	0.792449	0.98003	0.988919	1.04284	0.978177	0.882949	0.881711	1.06241	0.851836	0.95358	1.12103	0.950361	1.31621	1.07538	1.01411	0.876972	0.91388	1.00231	1.40848	1.21526	0.859867	0.985715	0.9823	0.954836	0.861592	1.00567	1.14827
Q96PE2	Rho guanine nucleotide exchange factor 17 OS=Homo sapiens OX=9606 GN=ARHGEF17 PE=1 SV=1 - [ARHGH_HUMAN]	0.44	1	1	1	22.1	8
Q8IZ73	RNA pseudouridylate synthase domain-containing protein 2 OS=Homo sapiens OX=9606 GN=RPUSD2 PE=1 SV=2 - [RUSD2_HUMAN]	2.39	1	1	1	22.83	1
A0A096LPE2	SAA2-SAA4 readthrough OS=Homo sapiens OX=9606 GN=SAA2-SAA4 PE=4 SV=1 - [A0A096LPE2_HUMAN]	20.19	6	3	4	188.37	54	0.759092	0.891656	0.916098	1.20541	1.00714	1.02853	0.752357	0.917502	0.898249	1.01385	0.892264	0.906731	0.931552	0.869688	1.08529	1.0963	1.11623	1.13947	1.19347	1.04625	1.29075	1.05935	1.11305	1.02303	0.827312	0.851759	0.766784	0.925249	1.0423	1.3789	0.834389	0.924995	0.899422	1.05637	1.26939	1.21168	0.989413	0.89226	1.12332	0.928834	1	1.21685
A0A182DWH8	Selenoprotein P (Fragment) OS=Homo sapiens OX=9606 GN=SELENOP PE=1 SV=1 - [A0A182DWH8_HUMAN]	10.53	3	1	1	44.34	1		1.94102						0.784557						1.83568						0.985124						1.22892						2.4422						1.01558
P02787	Serotransferrin OS=Homo sapiens OX=9606 GN=TF PE=1 SV=3 - [TRFE_HUMAN]	66.05	10	49	49	9820.91	2015	1.06126	1.15956	1.08658	0.960893	0.872939	0.982123	1.00061	1.1663	1.18637	1.08111	0.977224	1.00225	0.983592	0.892379	1.00728	0.921462	0.950701	1.04883	1.13445	1.00343	0.789756	0.970498	1.09126	0.867412	1.34856	0.992206	0.897563	1.02097	0.995625	0.999523	1.28702	0.833936	0.898428	1.04013	1.10276	0.861314	0.861055	0.973866	1.07791	1.12786	0.912585	1.06924
E9PQD6	Serum amyloid A protein OS=Homo sapiens OX=9606 GN=SAA1 PE=1 SV=1 - [E9PQD6_HUMAN]	27.87	6	1	2	41.82	2		1.82019						1.19877						1.25891						1.3521						0.353911						1.05375						1.85464
P02743	Serum amyloid P-component OS=Homo sapiens OX=9606 GN=APCS PE=1 SV=2 - [SAMP_HUMAN]	20.63	1	5	5	448.942	93	1.25477	1.01558	0.913719	0.934276	0.856084	0.717807	1.26208	1	0.996062	0.817153	0.94825	0.932769	1.01822	0.938509	0.92871	0.932582	0.872395	0.804819	0.896918	0.993648	1.3231	0.852547	0.871692	1.01264	0.84751	0.856239	0.824466	1.07291	1.18046	0.923754	0.978456	0.940814	0.901717	1.19206	1.23307	1.10307	1.17685	0.92782	0.874261	1.10847	0.740507	0.822245
P27169	Serum paraoxonase/arylesterase 1 OS=Homo sapiens OX=9606 GN=PON1 PE=1 SV=3 - [PON1_HUMAN]	54.08	3	11	11	1338.13	198	1.13628	1.08764	0.784155	1.03596	0.928302	1.11254	1.11598	0.919149	0.769337	1.08674	0.977425	0.989392	0.81626	0.933546	0.760335	1.08019	0.840679	0.919732	0.83883	0.973716	0.920962	1.05625	0.820211	0.884523	1.31055	1.06464	1.01414	1.22628	1.20719	1.24015	1.45158	1.0249	0.937949	1.35078	1.25326	1	0.880885	0.753946	1.10572	0.850715	1.01534	1.27761
I3L2X4	Sex hormone-binding globulin OS=Homo sapiens OX=9606 GN=SHBG PE=1 SV=1 - [I3L2X4_HUMAN]	8.28	3	1	1	87.44	8	1.79906	1.27066		1.65491	0.573882	3.60944	1.47132	0.763784		1.73096	0.978301	1.23785	2.11875	2.9268		3.29218	0.744996	5.64511	2.80896	0.665559		0.524943	0.453557	0.742921	0.756911	1.06581		2.13739	0.633848	2.99081	0.98256	1.75324		0.950391	0.965066	1.10711	1.63152	1.17126		0.847405	1.42273	2.61334
Q5SXM2	snRNA-activating protein complex subunit 4 OS=Homo sapiens OX=9606 GN=SNAPC4 PE=1 SV=1 - [SNPC4_HUMAN]	0.54	1	1	1	26.6	8
A0A087X1I6	Sodium-coupled neutral amino acid transporter 5 OS=Homo sapiens OX=9606 GN=SLC38A5 PE=1 SV=1 - [A0A087X1I6_HUMAN]	2.48	2	1	1	25.28	11	0.807806		2.19001		1.12532	4.68241	0.581781		0.44761		0.603006	0.414081	2.1337		1.35737		1.38961	1.35946	0.592938		0.523485		0.429788	1.2467	0.436895		2.00787		3.20585	0.754407	0.19712		0.348595		0.490936	0.557955	0.479826		2.94448		3.44877	2.1854
P02768	Serum albumin precursor OS=Homo sapiens OX=9606 GN=ALB PE=1 SV=2 - [ALBU_HUMAN]	80.95	9	64	70	133690	47060	1.08447	1.1344	1.2606	0.944446	0.95655	1.07505	1.02567	1.19617	1.20786	1.20774	1.09917	0.91818	0.960678	0.947824	1.35927	1.12119	1.03806	0.969945	1.28689	1.16276	0.907254	1.12243	1.19459	0.923597	1.0863	1.02304	1.10127	1.21747	1.03216	1.24373	1.2054	0.952216	1.20602	1.15019	1.20061	0.959627	0.920513	1.14568	1.06813	0.800484	1.03066	1.24969
Q9UMS6	Synaptopodin-2 OS=Homo sapiens OX=9606 GN=SYNPO2 PE=1 SV=2 - [SYNP2_HUMAN]	1.56	2	1	1	25.74	3
P05543	Thyroxine-binding globulin OS=Homo sapiens OX=9606 GN=SERPINA7 PE=1 SV=2 - [THBG_HUMAN]	9.16	2	2	2	44.2	4					0.772539	3.10437					1.31696	0.964694					0.942526	1					1.27073	1.07265					1.32104	1.88477					1.68827	1.03703					2.67109	1.92942
P02766	Transthyretin OS=Homo sapiens OX=9606 GN=TTR PE=1 SV=1 - [TTHY_HUMAN]	65.31	3	9	9	1684.98	262	1.25346	1.51161	1.21885	1.08721	0.939397	0.696703	1.08556	1.39613	1.3871	1.17573	1.11034	0.827412	1.0128	0.989498	1.24928	1.09826	1.08576	1.05479	1.13431	1.16134	0.936415	1.03897	1.03682	0.831467	1.09418	1.06644	1.08713	1.2167	1.14882	1.09588	1.04385	0.9482	1.19655	1.36833	1.17767	0.982453	1.12779	1.21844	1.17564	0.862567	1.04377	1.15905
E9PJG8	Triokinase/FMN cyclase (Fragment) OS=Homo sapiens OX=9606 GN=TKFC PE=1 SV=2 - [E9PJG8_HUMAN]	4.32	3	1	1	33.5846	2
F5H0Q0	tRNA-dihydrouridine(16/17) synthase [NAD(P)(+)]-like (Fragment) OS=Homo sapiens OX=9606 GN=DUS1L PE=1 SV=2 - [F5H0Q0_HUMAN]	3.35	1	1	1	28.8	3
H3BN94	Ubiquitin-conjugating enzyme E2 Q2 (Fragment) OS=Homo sapiens OX=9606 GN=UBE2Q2 PE=1 SV=1 - [H3BN94_HUMAN]	8.79	4	1	1	27.03	1
P02774	Vitamin D-binding protein OS=Homo sapiens OX=9606 GN=GC PE=1 SV=2 - [VTDB_HUMAN]	66.24	8	26	26	2691.48	563	1.04098	0.967571	1.02489	0.845747	0.78675	0.952866	1.11267	0.929424	1.09046	0.978532	0.775201	1.01606	1.00519	1.11164	1.066	1	0.819027	1.07809	1.25194	1.23537	1.12309	0.974997	1.03987	0.972541	0.907234	0.981559	1.11094	0.977116	1.04356	0.875232	0.841972	1.18575	1.06242	1.03752	1.12858	0.876541	0.976786	1.02046	1.1588	0.869948	0.908155	0.867146
A0A3B3IRK9	Vitamin K-dependent protein S OS=Homo sapiens OX=9606 GN=PROS1 PE=1 SV=1 - [A0A3B3IRK9_HUMAN]	10.97	5	3	3	155.6	23	1.67098	0.67523	1.83654	1.22831	1.10592	3.06647	1.297	0.789336	1.11472	1.20323	1.85419	1.0042	2.42777	1.31219	1.487	1.20918	2.78833	1.19109	0.992063	1.77156	0.695172	1.12173	0.805009	1.07265	0.600728	1.18842	2.14552	1.56078	2.4493	1.48192	1.19032	1.31792	1.16966	0.840208	0.909272	0.678738	0.370898	0.682927	1.12538	0.500503	2.35854	1.46101
P04004	Vitronectin OS=Homo sapiens OX=9606 GN=VTN PE=1 SV=1 - [VTNC_HUMAN]	26.36	2	8	8	740.166	152	1.0107	1.034	1.06225	0.985885	0.870554	0.903127	0.948796	1.02561	1.16896	0.987461	0.924418	0.886691	1.1081	0.882361	1.04487	0.9059	0.943719	0.937855	1.02389	1.00364	1.05656	0.92721	1.10437	0.87737	1.00787	0.89262	0.979696	1.08136	0.948073	1.25923	1.02111	1.06715	0.90272	1.04928	0.891937	0.995213	0.9655	1.06514	1.09788	1.12444	0.854881	0.920441
P04275	von Willebrand factor OS=Homo sapiens OX=9606 GN=VWF PE=1 SV=4 - [VWF_HUMAN]	0.46	1	1	1	70.72	3					1.37493						1.19466						1.46352						12.0502						1.09041						1.60435						1.64055
Q9NQZ6	Zinc finger C4H2 domain-containing protein OS=Homo sapiens OX=9606 GN=ZC4H2 PE=1 SV=1 - [ZC4H2_HUMAN]	3.13	1	1	1	55.0967	10
P25311	Zinc-alpha-2-glycoprotein OS=Homo sapiens OX=9606 GN=AZGP1 PE=1 SV=2 - [ZA2G_HUMAN]	39.6	3	12	12	995.141	205	1.02283	1.33208	0.970074	0.994454	0.798629	0.778326	0.961386	1.2023	1.1024	1.324	0.810315	0.918731	0.734997	1.08327	1.4018	1.01445	1.1228	0.813026	0.998558	1.27402	1.15437	1.0347	1.24865	0.622413	0.842896	1.05979	0.966596	1.0319	1.05792	0.960868	0.739198	0.87349	0.991445	1.04633	1.32228	0.786661	1.18645	0.780413	0.923979	0.832093	0.948345	1.27606
[truncated: 18 more columns]
