# Supplementary material for: A red-fleshed apple rich in anthocyanins improves endothelial function, reduces inflammation, and modulates the immune system in hypercholesterolemic subjects: the AppleCOR study
Source: Royal Society of Chemistry journal article supplement (doi:10.1039/d3fo05114e), 2024-01-01
Supplement: d3fo05114e23.xlsx [file d3fo05114e23.xlsx]

## Sheet: Full1
Swiss-Prot ID	Peptide	Phosphorylation Site	ID-1	ID-10	ID-11	ID-12	ID-13	ID-14	ID-15	ID-16	ID-17	ID-18	ID-19	ID-2	ID-20	ID-21	ID-22	ID-23	ID-24	ID-25	ID-26	ID-27	ID-28	ID-29	ID-3	ID-30	ID-31	ID-32	ID-33	ID-34	ID-35	ID-36	ID-37	ID-38	ID-39	ID-4	ID-40	ID-41	ID-42	ID-43	ID-44	ID-45	ID-46	ID-47	ID-48	ID-49	ID-5	ID-50	ID-51
	CLSIQEMLTGQR	C1(Carbamidomethyl)- M7(Oxidation)- T9(Phospho)			2532000	13300000		5720000	2600000	281400			2732000		2271000			163000	188700	213700	295900	268100		115000	1139000	68630					1533000		148800	1854000			1596000		37190		1318000	2575000					1294000
	CSQQELSR	C1(Carbamidomethyl)- S2(Phospho)- S7(Phospho)			4145		577800								448300			382900		423300	332100	13800		244700		32940	3788000	2144000														227900			3820000	1278000	6496000	2665000	2163000
	CAGSSLFLKR	C1(Carbamidomethyl)- S4(Phospho)- S5(Phospho)	231800	3632000	2558000		2265000	298600					14480	249400	1164000				1394000	121900	1697000	12150		81260	5683000	985900		2596000								3419000		1134000								347900	198700
P02765	CDSSPDSAEDVRK	C1(Carbamidomethyl)- S7(Phospho)	6469000	1654000	2634000	19000000	146000000	238300	19800000	18000000	1511000	21200000	1748000	56400000	119000000	114400	252000000	14500000	15800000	86700000	13600000	140000000		78000000	144000000	141000000	112000000	148000000	14100000	15600000	124000000	1165000	112000000	18100000	127000000	222000000	136000000	12500000	156000000	8113000	1724000	146700	11400000	9559000	13500000	12100000	14000000	84700000	83100000
P02765	CDSSPDSAEDVR	C1(Carbamidomethyl)- S7(Phospho)		362400	4412000	2687000	3891000	4930000	5748000	29200000			122600	65150	12700000	1539000	48400000	2486000	2680000	1496000	2194000	25700000		748600	16700000	21500000	21700000	26600000	27500000	41500000	22000000	2246000	17700000	3343000	21400000	4743	2929000	2577000	3548000	16200000	17800000	19900000	29420	157900	2720000	1590000	23390	1536000	15600000
	CATPLKDEER	C1(Carbamidomethyl)- T3(Phospho)	231800	3632000	2558000		2265000	298600					14480	249400	1164000				1394000	121900	1697000	12150		81260	5683000	985900		2596000								3419000		1134000								347900	198700
	LCSFCKHNGESR	C2(Carbamidomethyl)- C5(Carbamidomethyl)- S11(Phospho)		23800000					19500000	8558000	3420000		656500					11200000	887400						17300000		177900		1383000	11600000				123400			14100000						88830						11800000
P02768-A0A0C4DGB6-H7C013-A0A087WWT3	TCVADESAENCDK	C2(Carbamidomethyl)- S7(Phospho)- C11(Carbamidomethyl)	5583000	8932000	8496000	6452000	96960	8982000	6692000	69200000		13700000	61480	3598000	613200	798500	99600000	6940000	73200000	36700000	6161000	5174000		4153000	67200000	69200000	57600000	5826000	64870	6174000	5470000	44400000	45600000	617500	52380	9944000	63800000	62400000	729800	57400000	44700000	495500	51300000	27800000	55200000	4276000	71400000	49800000	49400000
Q9UPM6	NICSSCGLEILDR	C3(Carbamidomethyl)- S5(Phospho)- C6(Carbamidomethyl)				9543000		5569000	6673000	2298000					3445000		331400	76710	13900000	171200	1286000	9168000			8143000			4920000000		593300	857900		142900	49920		791200	745000000			31510	428400	743400				538100			511500
	EPCHSKVPQPGNTK	C3(Carbamidomethyl)- T13(Phospho)		5951000	11700000			7462000	92860	5668000			3467000	1519000			5475000	7698000	4535000		6640000			5356000	263600	4467000	6945000	4725000	672800	8792000	4721000		493400	4747000		9716	83630	4565000	813300	2172000	6136000	4785000			29680	188400	87240		4462
	VAKCTAKPSSSGK	C4(Carbamidomethyl)- T5(Phospho)		43500000			2880000	6189000	511100		968700					1140000				9836						146200			24300000	1483000		23000000		16700000	146600	35700000		1577000	17400000										77470
P02751-H0Y7Z1	TNTNVNCPIECFMPLDVQADREDSRE	C7(Carbamidomethyl)- C11(Carbamidomethyl)- M13(Oxidation)- S24(Phospho)		81800000	1660000000	151000000		83500000		57700000	6692000		27800000	23600000	287000000		120000000	26700000	638000000	443000000	97300000	62900000				49500000	5842000	352000000	642000000	51200000	5828000	6116000	116000000	58200000	73800000		62500000	44900000	534000000		18000000	54000000		3857000	56300000	36900000		46900000	8262000
	IDREELCAQSPR	C7(Carbamidomethyl)- S10(Phospho)			48600000	82700000		427500			1317000		2376000	2884000	3128000	3434000					62500000			255400	638400		39000000	255400	34500000					4984000			3997000	13700000	224200				2630000	169800		51800000		377500	25500000
P54840	GDLWEACSVGIPYHDR	C7(Carbamidomethyl)- S8(Phospho)	9823000				12500000	22300000			3380000					169100	974800	164100			1572000			112300				14200000	12800000	1430000		1190000	9219000		9494000						833600		1114	56580	7898000	112300		851900
	MQRADSEQPSK	M1(Oxidation)- S10(Phospho)			1296000	1416000			953700	1733				2789000	99720				3998000		531400						4696000	4932000			31270	38650	38730			1432000	76990		438600	296200			485800		4242000
	MVAGLLNSGISNK	M1(Oxidation)- S11(Phospho)							1396000					958300			239400	5320000		1763000						1631000		438400								181800	539300	1773000	141800	1478000	154300							4133000
	MSAAQGWDRNR	M1(Oxidation)- S2(Phospho)		967800		11800000	927500	1211000	522300	9173000		634700		8556000			660000	515300								5372000		89250					1367000		49130						469900		343700		5293000	5344000	1775000
F8VWL3	MSDEGGSNFR	M1(Oxidation)- S2(Phospho)						139800	48300000						13340			116400			63450			252000	1976000	49180	983000		4344000					3118					4846000
	MSAAKENPCRK	M1(Oxidation)- S2(Phospho)- C9(Carbamidomethyl)		967800		11800000	927500	1211000	522300	9173000		634700		8556000			660000	515300							3387000	5372000		89250					1367000		49130						469900		343700		5293000	5344000	1775000
	MSLVPSVANGLSKGTAR	M1(Oxidation)- S2(Phospho)- T15(Phospho)			49940	1748000			5822000									436500	3747000						4238000						659400	4117000	2269000	4764000	3522000	4356	1659000					2383000					297000
	MLSKPEEINAR	M1(Oxidation)- S3(Phospho)	2774000	452800	3197000					457500						256500		4767000								2164000	2543000		2764000	19680				3337000	4256000	28670		1896000	2936000				3846		2595000	1768000	416000		1376000
	MGSQVKTWKRR	M1(Oxidation)- S3(Phospho)- T7(Phospho)						11100000	1592000						7695000			1182000	1998000				311400				13600000	9397000				1688000	291800	1817000						699500
	MAPSRFR	M1(Oxidation)- S4(Phospho)		673000	44320		134100	5593	55910	51430			425600		2263		58650	275200			318700	54160		211800	341100			51820					277700								15330	3985				378400
	MELSKSFR	M1(Oxidation)- S4(Phospho)- S6(Phospho)	634200		1982000			2466000	697800	2397000				933600				5995000							2767000				913200						5689000							32730		199600	463700
	MFHDSLAGGSGGR	M1(Oxidation)- S5(Phospho)	1716000		1217000	225800	349600	315600	522300					8556000				515300	1956000								472800		588000		139700	7566000			49130	131800					193600	514600					1775000	4974000
	MAASLSER	M1(Oxidation)- S6(Phospho)		673000	44320		134100	5593	55910	51430			425600		2263		58650	275200	48240		318700	54160		211800	341100			51820					277700								15330	3985				378400
	MALADSTR	M1(Oxidation)- S6(Phospho)		673000	44320		134100	5593	55910	51430			425600		2263		58650	275200			318700	54160		211800	341100			51820					277700								15330	3985				378400
	MHGGRSCGPR	M1(Oxidation)- S6(Phospho)- C7(Carbamidomethyl)														1522000													279400						22750			21820				2370			263300				45390
	MVTIWGGASLLR	M1(Oxidation)- S9(Phospho)							1396000					958300			239400	5320000		1763000								438400								181800	539300	1773000	141800	1478000	154300							4133000	525000
	MTWLQSKPQR	M1(Oxidation)- T2(Phospho)		1925000	1327000	133300		748700						1432000											377700				155800						1229000											1294000	9569
	MTPLRPCASSR	M1(Oxidation)- T2(Phospho)- C7(Carbamidomethyl)	264000000	32700000		453000000		469000000	29900000				18200000		289000000			253000000	21500000						47700000	21900000		299000000	24600000		174000000	288000000			2317000		23700000	269000000				168000000	164000000						12300000
K7ESM5	MASTFIGNSTAIQ	M1(Oxidation)- T4(Phospho)- T10(Phospho)	567300	11600000			2583000	4514000	13000000	800000			633900	491100			11500000	583600			7513000	8742000		4925000	56170			5616000		421300			784200	4982000	565200		62940				35550	494800	732600	436000	37460	2975000	9966000	322600	2643000
	MVHQTRASLR	M1(Oxidation)- T5(Phospho)			1968000	784800				5872000								1861000										3351000									7893000	168800			5442000	185700				26220
	MTEGTCLRRR	M1(Oxidation)- T5(Phospho)- C6(Carbamidomethyl)		18900000		54900000	24900000			232400		136900	3983000	393700	821500	3623000	355500	4929000	825400	8154000	74660	1563000			32450	269700			645400	7849000	2891000	1525000	2337000	3119000		26600000			4742000			372400	695300	3144000		936200	7527000		1726000
	MAASETVR	M1(Oxidation)- T6(Phospho)		673000	44320		134100	5593	55910	51430			425600		2263		58650	275200	48240		318700	54160		211800	341100			51820					277700								15330	3985				378400
	MASALTDR	M1(Oxidation)- T6(Phospho)		673000	44320		134100	5593	55910	51430			425600		2263		58650	275200	48240		318700	54160		211800	341100			51820					277700								15330	3985				378400
P04275	HSALSVELHSDMEVTVNGR	M12(Oxidation)- T15(Phospho)			4222000	35600000	5972000		45300000	486000000		129000000		24100000			194900			2738000	457000000	36300000		255000000	96700000	43400000	4140000	31700000		1648000	296000000			57400000	573000000	13200000		228000000			211000000	374000000			3134000	4574000	2342000	9293000	131000000
P49908-A0A182DWH7	DMPASEDLQDLQK	M2(Oxidation)- S5(Phospho)		62300000	59900000	317000		44600000		54100000					44300000	43800000	378600		62500000			3155000		2994000	38600000		39100000	317500	38300000	2527000		3577000	362400	3448000			3697000	3323000			26300000	36200000	3938000			2738000	5834000		22700000
	YLMGDLLGEGSYGK	M3(Oxidation)- S11(Phospho)		354100	26700000		1759000	14200000	52800000				144800	4486000	29400000	27300000	41900000	2960000				29500000		11800000			2221000	23300000		2336000		33500000		2258000	43500000	19200000	541700	12600000	21500000	11800000	28800000	28500000			29890	356400
	TEMTASSSSDYGQTSKMSPR	M3(Oxidation)- T4(Phospho)- Y11(Phospho)- M17(Oxidation)		28300000	40000000	28500000	28400000	353300	3717000	29600000	874500		25800000	156900		33400000	45200000		3913000		26600000	29100000		26000000		3253000	32500000	346900	396700	45400000	21580	2848000	33500000	39500000	25900000		25900000	29200000		2919000	3333000		4446000	295100	32300000	24500000	5233000	21300000
	VSAMDADSGPNAK	M4(Oxidation)- S8(Phospho)		56260		5938000	198500	2398000	51600		1763000		29880	154100			5653000	2448000		181300	4165000	498700		2538000		291800		294800	2655000	221500		294900				391400		1815000					413800			417200		3294000	3723000
P02649-E9PEV4-H0Y7L5-E7ERP7	GEVQAMLGQSTEELR	M6(Oxidation)- S10(Phospho)		2229000	16700000	11900000	8483000	26500000	4589000	1850000	1229000		9772000	2320000	7970000	9644	6574000	76220	24100000	613800	2682000	15500000		17500000	1799000	12600000	1560000	19700000	183900	113900	13900000	12100000	1237000	14100000	88740	1171000	1195000	97220	9743000	497100	138600	2300000	11500000	17200000	753200	8274000	237700	12670	8732000
	QVIADMREKRYEDEGIGSSYMFR	M6(Oxidation)- Y11(Phospho)- S18(Phospho)- S19(Phospho)		3132000				28300000		12400000							63900000								52300000			117000000			1823000		19100000	16300000	84200000		2936000			166000000	23500000				123700		22300000	7842000
	SSLTTLPSMSR	M9(Oxidation)- S10(Phospho)	19400000	29400000		1854000		12500000	1978000	8712000			823900			11800000	18400000			7831000	11700000	1833000		737600			14500000					17780				1818000					7539000		7846000	7433			1633000	746900	656500
	CVSCNVSVDK	N-Term(Acetyl)- C1(Carbamidomethyl)- C4(Carbamidomethyl)- S7(Phospho)											2366000	15300000	6998000			626500	287000		2988			126700			2830000									4243000	14210							145400	1856000
	CLVYPHAPKSSR	N-Term(Acetyl)- C1(Carbamidomethyl)- Y4(Phospho)		458200								2983000							1224000			98170										6874000													3789000	9468
	KMSCTICGHKFPR	N-Term(Acetyl)- C4(Carbamidomethyl)- T5(Phospho)- C7(Carbamidomethyl)				11900000		26500000		1850000	1229000			2320000	7970000	9644	6574000		24100000	613800		15500000		17500000	1799000	12600000	1560000	19700000		113900		12100000	1237000	14100000	88740	1171000	1195000	97220	9743000	497100		2300000	11500000	17200000				12670	8732000
	SNPYCEISMGSQSYTTR	N-Term(Acetyl)- C5(Carbamidomethyl)- S8(Phospho)			2643000		21200000	5994000						44200000	1134000	25900000	238900	5212000		156400	3725000	35900000						481200	4513000				27800000		3188000	3388000	47800000				222300		39000000
	MNWLGRPSK	N-Term(Acetyl)- M1(Oxidation)- S8(Phospho)			488500	273500	293600		5894000	25500000	13700000			16100000	278200				16700000	994400	2515	1649000			42300000		19900000	24900000	18300000		2138000	35500000	8513000	9646000	521400	16400000		13400000	1739000	36960		172100		7644000	736700	14500000	20000000		5137000
	SMSLTLGKNMPR	N-Term(Acetyl)- M2(Oxidation)- S3(Phospho)- T5(Phospho)- M10(Oxidation)		2995000			4257000	6488000		3976000							245600			2764000	92670																1628000										276800
Q9UBC1-A0A0A0MRT5-F2Z390-A0A140TA04	SSMASTSRR	N-Term(Acetyl)- M3(Oxidation)- S7(Phospho)		42610			427100							2342000		221800					288500			2525000	3657000		2936000	275500	299700	1865000	262500		325800		455200				17370	2648000	227600		3215000	191400			337400	214800
H0YET9	EVMTTLYLRTLLAR	N-Term(Acetyl)- M3(Oxidation)- T4(Phospho)- T10(Phospho)		2624000	358200	2643000			288800	2570000			177900	5345000	1679000			1968000	1197000	1449000	3159000	19480		21880	3485000	374600	2799000	2152000	3634000	1355000	1729000	1146000	1535000	1920000	24300	1316000	2273000	18760	1633000	193900	153200	97630	161300	824800	149400			1816000	1662000
	KAKMPSASTESR	N-Term(Acetyl)- M4(Oxidation)- S6(Phospho)- T9(Phospho)		4262000	3874000	3393000		1971000	5215000	2896000	17700000		167200		13600000	24800000	373500	2495000	312500	1576000	331600	3979000		1624000	277000	19600000		2267000	2561000	1713000	2486000	2114000	2942000	23100000	22700000	3945000	3795000	1313000			1446000		29900000	1875000		22900000	376500	1972000	22700000
	NGVMTKDTWLDHR	N-Term(Acetyl)- M4(Oxidation)- T5(Phospho)	35300000				585400	8332000	179000000	17300000		33200000	124000000		8252000		8443000							64500000	1949000		5913000					52900000	86100000					5690000	5985000			7423000	18000000	63300000
	SFWAQLGMALTR	N-Term(Acetyl)- M8(Oxidation)- T11(Phospho)		3555000	28600000	3593000	1576000	1649000								1649000	23300000				21500000	267400				1156000			1292000							185700			145300		73180					16700000	2142000	16400000
D6REQ2	SALLRLG	N-Term(Acetyl)- S1(Phospho)	557700	1565000	6432000	3344000	77780	138400	637900	5246000	112400	685800	2692000	7675000	3399000		2728000	3115000	488400	267500	517400	382600		161300	1756000	22250	2356000	667100	492300	3518000	2743000	4979000	332600	18190	183900	9787000	12600000	1852000	237300	1142000	435600	262600	245900	1224000	35360	88340	2729000	2884000	2437000
	SLTCSKNR	N-Term(Acetyl)- S1(Phospho)- C4(Carbamidomethyl)- S5(Phospho)			4145	892500	577800								448300	39180		382900	281400	423300	332100	13800		244700		32940	3788000	2144000														227900			3820000	1278000	6496000	2665000	2163000
	SHSVLGRR	N-Term(Acetyl)- S1(Phospho)- S3(Phospho)						138000000	25200000					18400000			911400				568800				11300000	65000000	7859000		53800000					3853000						389800			56900000	43700000		334000	17600000		2385000
Q52M93-Q6P3V2-A0A0C4DFY4-E9PQH3	SELITHHR	N-Term(Acetyl)- S1(Phospho)- T5(Phospho)	66400000	7818000	5949000	5736000	428300	26400000	12900000	2539000			35400000	2278000	1591000		418800	366800		3796000		6951000	661100	2928000	6950000	2856000	56700000	43200000	3334000	1866000	12800000	2818000	344800	264300		77500000	48000000	2521000		31100000	34900000	319600	32200000	2194000	396800		488800	3699000
Q6PJP8	IPESSNVGGSR	N-Term(Acetyl)- S10(Phospho)						1188000	34910	681500				113100	1222000									241300			14390						24390	274200											178400		612900
	SSKSSTPVPSK	N-Term(Acetyl)- S10(Phospho)			488500	273500	293600		5894000	25500000	13700000			16100000	278200				16700000	994400	2515	1649000			42300000		19900000	24900000	18300000		2138000	35500000	8513000	9646000	521400	16400000				36960		172100			736700	14500000	20000000		5137000
	EGIASSQLGSR	N-Term(Acetyl)- S10(Phospho)			488500	273500	293600		5894000	25500000	13700000			16100000	278200				16700000	994400	2515				42300000		19900000	24900000	18300000		2138000	35500000	8513000	9646000	521400	16400000				36960		172100			736700	14500000	20000000
	QSGSKIMAASLR	N-Term(Acetyl)- S10(Phospho)		1558000	1544000	133300		748700	917600	1355000				1432000	99250		6527				13810				377700		9673		155800						1229000											1549000	1831
	QSLALSSR	N-Term(Acetyl)- S2(Phospho)	123700							1299000			6792000		7646000		6794000						97360			7166000			785400				677800		7283	13600000	6779000				6869000				6958000			656900
	KSMSHQAAIASQR	N-Term(Acetyl)- S2(Phospho)		458200				225500				2983000			775200				1224000			98170	754700					591700		3860000		6874000	7168000			1551000	1685000							267100	3789000	9468
	SSRLMSHQR	N-Term(Acetyl)- S2(Phospho)- M5(Oxidation)	19000000	483700	2720000		23900000	183300		1358000	615200		927400	2231000	11800000	149600	1479000				228600			7289000	464800											379600		63990	537900		11100000		727800	387500	529000		12900000	1522000
	SSDLMKHQR	N-Term(Acetyl)- S2(Phospho)- M5(Oxidation)		483700	2720000		23900000	183300			615200		927400	2231000							228600			7289000	464800		1397000									379600		63990	537900		11100000		727800	387500	529000	246400	12900000	1522000
	SSNLMEHKR	N-Term(Acetyl)- S2(Phospho)- M5(Oxidation)		483700	2720000		23900000	183300			615200		927400											7289000	464800											379600		63990	537900		11100000		727800	387500	529000		12900000	1522000
	NSTAKAMTGSWAATPPSQGDQVQLKMLPPAQ	N-Term(Acetyl)- S2(Phospho)- M7(Oxidation)										13900000		63000000								46800000				287000		28000000			44500000			31800000							268700			15700000	18900000	763000
	LSEKSGLCLSKR	N-Term(Acetyl)- S2(Phospho)- S5(Phospho)- C8(Carbamidomethyl)- S10(Phospho)				17700000	97900000		8991000							62700000			44200000								4480000		6996000			77300000			1233000													1299000
Q76M96-H7C5K4	QSLENFLSRFR	N-Term(Acetyl)- S2(Phospho)- S8(Phospho)		354100	26700000	24100000	1759000	14200000	4417000		866600	578600	144800	4486000	29400000		41900000	2960000	315600	864800	3916000	29500000		11800000		1752000	2221000	23300000	24300000	2336000	14400000	152500	44700000	2258000	43500000	19200000	541700	12600000	21500000		28800000	28500000	35900000	11400000	29890	356400	2215000	289800	1826000
	KSPGSTSRR	N-Term(Acetyl)- S2(Phospho)- T6(Phospho)																			581900	77880				253700		465700	41770		168300	2538	41810	34230	21820		529400					38650	38560
O75145	VSSSGLDSLGRYR	N-Term(Acetyl)- S2(Phospho)- Y12(Phospho)		8321000	643400	7486000			9443000						468900	593700	8383		545300			5584000				2811000	3587000	617900	672100	7912000	475600	163600	163500	678000	9381000	3521000	1376000		733300	3792000		11500000	11100000			11800000	339400	9258000
Q9H5Z6	LTSVSAK	N-Term(Acetyl)- S3(Phospho)	2942000	424400	4188000	5860000	3628000	78620	3474000	3276000			1958000	6284000	356300	1852000	26950	257800	1983000	75770	257700	1692000		92430	9235000	1288000	1517000	372700	2785000	928500	1416000	3212000	785300	794500	1183000	3170000	217200	1953000	823800	67420	18990	726200	126700	76270	1437000	3385000	261300	1218000	58920
	NGSTSRALPATPQLPSR	N-Term(Acetyl)- S3(Phospho)- S16(Phospho)	1813000	1738000	16300000		12000000	22300000		13500000				12400000	12900000	11600000			15200000	3827000	1572000	1146000		1424000		154900					1746000				9287000		168800					824500				112300
	GRSRAKVVSQSQR	N-Term(Acetyl)- S3(Phospho)- S9(Phospho)		9796000				5724000	62480			138300		13200000		314500		5772000	464500						542300	357200		298800	4923000				3393000	5176000			324300					452500	3835000		321200		6497000
P35568	KGSGDYMPMSPK	N-Term(Acetyl)- S3(Phospho)- Y6(Phospho)													2125000	498800	3746000				7155000			7734		5149000	4284000		6273000	789600	559200			5299000				324600	5666000		318200		615900	349400	4259000		1953000
	KQASKSK	N-Term(Acetyl)- S4(Phospho)	1157000				8566		1377000	184300			796900							255000																						44370	47370			1599000
	QKISFLENNLEQLTK	N-Term(Acetyl)- S4(Phospho)			554000	33600000		474400	8969000	7636000			18660	28100000					2349000		71220				7572000		52840	818900	5469000		456700					3644000	25900000		5637000		118500	573600
	GGKYSVKEK	N-Term(Acetyl)- S5(Phospho)	14200000			2488000			8952000		3218000	2391000							9544000					4187000	3242000					363500				426600	735700						171100	4180000					14300000
P28838-H0Y9Q1	KKMAVSAK	N-Term(Acetyl)- S6(Phospho)	3731000	622500	6744000	472800	7312000	99000000	5549000	7937000	125300	6529000	31500000	8817000	4241000	29000000	45300000	38900000	34900000	34500000	4589000	3933000	1833000	2288000	11600000	1292000	22800000	49800000	31500000	188400	23700000	512900	1999000	17600000	2584000	66400000	4569000	44700000	2863000	1919000	38500000	2625000		165600	31800000	37200000	4435000	25500000	1518000
	GLAILSVIK	N-Term(Acetyl)- S6(Phospho)						199100						2599000							893800							1114000				63850							198400		2919000	132800	11870			1925000
Q96S65	ALLRASGVR	N-Term(Acetyl)- S6(Phospho)		88750		3863		971100						14480						61450		89470		26630	2239000		89360	71410		478600	453500						2835000				163200	641400				145800
	YFMPKSTIYR	N-Term(Acetyl)- S6(Phospho)		2219000		9757000			4127000	279700				592500			94540								392700		186800	362400	1938000							232400	5223000				2636000						1986000
	RHPEEPPSR	N-Term(Acetyl)- S8(Phospho)	229200		488500						13700000	683200								994400	99670							24900000	18300000			35500000	8513000	9646000	521400	16400000			1739000	36960					219300	14500000			5137000
	WNGSVHGSKVLTISTLR	N-Term(Acetyl)- S8(Phospho)- S14(Phospho)- T15(Phospho)		81410	6598000		52700000	49500000	64500000					3335000	480000	50000000				3152000	1646000							1386000		6521000	2140000		41300000		1195				2978000	13600000					1362000
	QGSDTSGLSR	N-Term(Acetyl)- S9(Phospho)		56800000			73920	162900	3555000						5489000	1117000	113100			571800							123200									1282000		457300									2452000
	ESMETHFGSHGR	N-Term(Acetyl)- S9(Phospho)			3949000	484500							117900			2516000		27810				375300			2954000	242000			263300		355200		2790000			344900	436200								1853000	281700
O60347	TGLGILR	N-Term(Acetyl)- T1(Phospho)	557700	1565000	6432000	3344000	77780	138400	637900	5246000	112400		2692000	7675000	3399000		2728000	3115000	488400	267500	517400	382600		161300	1756000	22250	2356000	667100	492300	3518000		4979000	332600	18190	183900	9787000	12600000	1852000	237300	1142000	435600	262600	245900	1224000	35360	88340		2884000	2437000
	TAGPDCNFR	N-Term(Acetyl)- T1(Phospho)- C6(Carbamidomethyl)	629700	6884000	2184000		28890	794900			439600		1542000		2965000	1129000	2129000	2811000			5752000				12100000		3554000	4343000				38920	287600	4186000	319900			3272000	338000	2318000		3182000	2875000		3594000				367300
	TFARYLSFRR	N-Term(Acetyl)- T1(Phospho)- S7(Phospho)								4879000							11800000					68730						2570000			2478000				464300	8126000			271300									5853000
Q8IYB4-C9JUZ5-C9JB85	KADGSDLISTDAEQR	N-Term(Acetyl)- T10(Phospho)		93990	83590	354200		17500000	255400	3700000			299900	8643000				4738000	1911000			539600		58660	8433000	4683000		7274000			6173000		471200	7738000		432400	5658000					1361000	5682000	8367000	2535000	4723000	14700000	4694000	3146000
	STITVGK	N-Term(Acetyl)- T2(Phospho)	2942000		4188000									6284000			26950		1983000		257700			92430						928500	1416000						217200				18990							1218000
	STLGSIK	N-Term(Acetyl)- T2(Phospho)	2942000		4188000				3474000	3276000				6284000	356300		26950		1983000		257700	1692000		92430				372700	2785000	928500	1416000	3212000					217200	1953000			18990							1218000
	LTVDEAVRK	N-Term(Acetyl)- T2(Phospho)	833200	246200			1485000	1299000	2224000	4634000				188200		119400	674700	73340		1886000		2447000			3845000				2747000	155400	185000			157000				2921000	168300			18700000				1273000		1779000
	ETLILITNGLHARGYGPLGGRARMR	N-Term(Acetyl)- T2(Phospho)						542500	1179000				2290000	1518000	296400									993600				679800							258300				8992000		4875000		6482000	3269000	2690000		1272000	554300
	ITPLMSAFRK	N-Term(Acetyl)- T2(Phospho)- M5(Oxidation)						3287000			3987000						4317000			6617000	7176000								76650			16700000		4614000	394500		215400	542000	652700		21900000			5391000	4843000	14500000		7498000
	NTESSAFGGSLPAKK	N-Term(Acetyl)- T2(Phospho)- S4(Phospho)				2566		1293000						47820						774600	1923000	1240000					8795		1475000								251400						891600			1794000
H0Y6M2	ITWMFSMTAVPALLAP	N-Term(Acetyl)- T2(Phospho)- S6(Phospho)- M7(Oxidation)					4877000		2122000	15300000	47100000	4754000	119000000	9248000		26600000		9434000	8194000	5146000				61730	123000000		7496000	12700000	1349000	6785000			138000000	11300000		93100000	13500000	433400	547700		52800000		123000000	52300000	6884000		142000000		6344000
	DTTETDLKQRR	N-Term(Acetyl)- T2(Phospho)- T3(Phospho)- T5(Phospho)	91200000	19600000			1523000	182000000	2252000					78000000		133000000	184000000					136000000					2392000	146000000				1437000								1239000				9248000		133100
	LTPLQTELYK	N-Term(Acetyl)- T2(Phospho)- Y9(Phospho)				6297000	1315000	139500			479200		1312000		487300		52460		893500	312800	1313	16120		77830	4685000	469200	112500	3160000						65430		2369000		1467000		925900	1784000	89350		952400	156400		144600
	WKTMSAK	N-Term(Acetyl)- T3(Phospho)	1423000	3428000	23820	2581000	3279000	437300	355500	326900			1186000	299800	1836000	1666000	15940	275400	2229000	1251000	142400	24460		7695	3843000	597700	1293000	227100	1635000	1387000	133600	2567000	1600000	125400	1428000	1245000	27340	227200	1396000	1367000	188400	149800	1137000	116500	166600		118300	176700	1684000
	RLTSSTYNLR	N-Term(Acetyl)- T3(Phospho)- S4(Phospho)- S5(Phospho)- T6(Phospho)				5360000		4889000	4755000	44620								393600				331700				1848000		3719000		464800		4363000	3117000	3566000		2932000	3976000	38400	44540	3367000	362800	3985000	3586000		4825000	5128000		39950
	TSLTPGCRYSVR	N-Term(Acetyl)- T4(Phospho)- C7(Carbamidomethyl)			28600000		1576000						11200000			1649000		16900000			21500000	267400			15200000	1156000			1292000	15300000	1794000					185700	2281000				73180			989700
	MTQTLDTR	N-Term(Acetyl)- T4(Phospho)- T7(Phospho)			4145		577800								448300			382900		423300	332100	13800		244700		32940	3788000	2144000														227900			3820000	1278000	6496000	2665000	2163000
Q6XPS3-G3V171	FQGVETPSQNR	N-Term(Acetyl)- T6(Phospho)		173600			500000							594100	422300		5947000			36620		524300				2968000	5760000	3689000	349300	3330000			459600	455300	418500							2457000	3989	227200				3286000
	SAESKTIEFGK	N-Term(Acetyl)- T6(Phospho)		9932000	3262000			3169000		6999000			4894000				1256000		4916000			6493000		1937000	12500000							3937000		1389000							3298000		263200
	KATSDTLESPPKIIPK	N-Term(Acetyl)- T6(Phospho)- S9(Phospho)				33600000			8969000	7636000			18660	28100000					2349000		71220				7572000		52840	818900	5469000		456700						18300000		342900		118500	9550000
	SEEIEQTSLSSK	N-Term(Acetyl)- T7(Phospho)	141700	2156000		1363000	965800		1168	19300000			9382000	25300000	1624000	878300	11800000	6321000	98500	4352000	1593000	11200000			12400000	11400000	1729000	174700	153000	1866000		21800000	829700			1546000	13100000	1544000			942800		7234000		1327000	14900000	15400000
Q8N568-G5E9L9-A0A0U1RR70	SSSSSPTSPGSFR	N-Term(Acetyl)- T7(Phospho)- S8(Phospho)- S11(Phospho)	63000000	48500000	34600000	28200000			5389000		52500000	25600000	45900000	412300		39000000	4727000	29300000	3230000	17600000				43800000	4396000	46700000	22600000	28200000	25400000	16800000	1863000	17900000	2373000			3817000			8657000		1584000	1558000	2818000	13400000	15800000	2873000
Q9H489	GEAASTATTPSLENGR	N-Term(Acetyl)- T8(Phospho)- T9(Phospho)	574000	464700	589400		1638000		59320						3179000			458600	3351000		3537000	27770				4185000	256000				1186000	166200		1357000	273300	278200	246900	1368000					4317000		1554000		4453000	128000
	XVGSPLSR	N-Term(Acetyl)- X1(D)- S7(Phospho)	166800	211600	2493000		2265000	1791000	1774000	1858000	465300	34380		226200	119700	1133000	113600			69290	111400				3318000								534800												91480	122700	1884000	72930
	XGGNSSPSAKDIK	N-Term(Acetyl)- X1(T)- S8(Phospho)						1164000																1933000			129400			1326000				2137	14900			694300					97970	978700		11850			1327000
	XVSTQNMKMGGLPR	N-Term(Acetyl)- X1(Y)- X1(Phospho)- S3(Phospho)- M7(Oxidation)				781200			71420												7418000	4384000									28410		5593000				5335000						53390				3785000
Q8NFM7	QGSRRNYFRSK	N-Term(Acetyl)- Y7(Phospho)		28200000	1970000	28800000		9913000	6317000	1154000				1792000	5695000				12700000			45900000	572000	2623000	2699000			2762000	24600000	1259000			31200000	35900000	33400000	3356000	55330			2149000	21500000			1493000			15900000
	SIVPISR	S1(Phospho)	557700			3344000	77780		637900	5246000				7675000	3399000		2728000	3115000						161300	1756000		2356000				2743000				183900			1852000		1142000			245900
P02652-V9GYG9-V9GYE3-V9GYM3	SKEQLTPLIK	S1(Phospho)	1717000	1514000	1657000	22200000	8778000	3362000	41600000	16400000	5944000	3758000	3697000	152500	198200	69430	76260	174900	21990	2153000	25000000	8197000		8690000	126600	13200000	1929000	725700	1582000	8642000	8573000	25420	81640	1181000	14300000	8574000	125600	658500	17500000	480000	16600000	158400	129200	12240	927700	3591000	1512000	11300000	65630
	SCESGTCGEIFMGYSSFNR	S1(Phospho)- C2(Carbamidomethyl)- C7(Carbamidomethyl)		2496000			13800000									2429000			1483000						2792000	15100000			7293000		5828000			599300		18700000					6926000			386600
Q8NEB7-E7EP66	SVCDSLGRR	S1(Phospho)- C3(Carbamidomethyl)	3676000	56800000	74400000	26920	73920	698500	1498000	25700000	19600000	14900000	2973000	11500000	5489000	47400000	51700000	4987000	323300	4286000	4168000	16600000		3354000	7450000	45900000	57700000	27900000	38400000	2230000	2325000	174600	2619000	23700000	2885000	67600000	23000000	457300	40000000	372800	2933000	2563000	39000000	29700000	47700000	19800000	111000000	28300000	2148000
	STKDSLERQRSELEDR	S1(Phospho)- T2(Phospho)- S5(Phospho)- S11(Phospho)						1377000			1169000	1463000				79600000	8159000	1422000			1416000	9766000			2792000			127500	7293000						683700		7352000		44960				652900	386600
	SLRFVTLLYR	S1(Phospho)- T6(Phospho)		2219000		9757000			4127000	279700				592500			94540								392700		186800	362400	1938000							232400					2636000						1986000
	RNKELQVELSG	S10(Phospho)	196900	828900			87570	187000							535000	58340		16320				319300														7394											1119000
	EAEEALRRSSR	S10(Phospho)						1164000																1933000			129400			1326000				2137	14900			694300					97970	978700		11850			1327000
	RDLEEMKADVESAK	S12(Phospho)	7669000	56280	7683000	3425000	9295000	13800000					8548000					4615000							7744000	5457000	6486000		862500	477800		7345000				536400					819400				6954000	66380
	EGASSRDILANSK	S12(Phospho)		2219000				3613000	4127000					592500			94540		2397000		276300						186800	362400	1938000		169500	283300	140000		1393000	232400					2636000			1449000			1986000
P02671	HPDEAAFFDTASTGK	S12(Phospho)		12200000	18600000	9628000	41600000	52700000	151000000	7727000	322800	22600000	619200	6459000	58100000	73200000	9114000	59300000	11800000	3163000	8518000	9677000		4229000	88200000	439200	62300000	633700	56300000	3333000	4963000	4767000	71400000	55800000	7483000	63300000	8866000	2630000	26800000	245900	35000000	54900000	8214000	41500000	3716000	5473000	16500000	55200000	4275000
Q9UGM5-E9PG08	GSVQYLPDLDDKNSQEK	S14(Phospho)			277400	1447000			175200	1491000			12600000	9232000		1113000			26000000						18700000			7679000		1637000	6986000	12500000			1129000	1842000		1815000	1451000			11200000			72160	1824000	2314000
P02671	GSESGIFTNTKESSSHHPGIAEFPSR	S14(Phospho)		178200	19270	18440		7342000	18300000	11300000		438300		8493000	167600		15600000		17200000	369300	15800000	148100		772500	19700	12350	14900000	119800	11200000	7390000	2485000	8775000	1163000	1344000	1455000	912000	957800	6142000	6285000	61280	5587000	1922000	1218000		857700		1800000	482700
	RIGVPSATEIIKASSK	S14(Phospho)			24400000	1457000	4333000		1788000	19200000		7112000					457700		1875000			2428000		14400000	1965		1687000		857200			69410	1184000				6919000						1247000	1713000			456700
P17936-H0Y485-H0Y5K2-B3KWK7-A6XND0-A6XND1-C9JMX4	YKVDYESQSTDTQNFSSESKR	S16(Phospho)		2595000	18100000	1836000	14600000	296400	2898000	2146000	1378000	653600	1794000	2537000	13900000	154600		19200000	1253000						214000	19700000	1542000	15900000	2227000	1739000		2485000			1596000	16600000	2266000	8985000	17500000		1498000	114800	1587000	1439000	11500000	17600000	19300000
Q9UK55-G3V2W1	VVQAPKEEEEDEQEASEEKASEEEK	S16(Phospho)- S21(Phospho)		3132000		327000000	227000000	28300000	422000000							651200						21700000		3134000	52300000		12600000	117000000		234000000		11700000	128000000	16300000	84200000		2936000	12100000	17600000	166000000	23500000	19600000	13700000	1972000	112000000		22300000	9175000
	MSRQANRGTESK	S2(Phospho)	154900		3917000		138400	4783000	1428000					415100			8588000	33420							17300000	1752000	85590	13590	9849000				597800		851400			92740										72970
P02671	ESSSHHPGIAEFPSR	S2(Phospho)	99980	17400000	1863000	12200000	864200	854500	2374000	15200000	3874000	4468000	1537000	6958000	1127000	13900000	1656000	868700	18000000	4479000	15300000	1693000		88980	1145000	165000	157500	1149000	12200000	757700	18500000		1176000	11500000	139400	1128000	1235000	6363000	5539000	61110	625.7	1589000	16570	712400	813400	115300	1822000	8320000	1156000
	SSEASPTAQR	S2(Phospho)			498600										31210	414700	796300		413200		544400	53520							22310														478700		273800		3913	356300
P01042	ESNEELTESCETK	S2(Phospho)- C10(Carbamidomethyl)		12600000	11400000		1254000		933200	1146000						11500000	15200000	1122000	121500		921400	1238000				949900	988400		1287000	12600000	9262000			983500	8568000	12300000	8935000	118700	11400000	7588000		943700	11600000	76820	991100		1252000	979500
Q13319	LSPQMLR	S2(Phospho)- M5(Oxidation)	678900	8268000	143300	1267000	17480	1327000	98700000	819800	16400000	1138000	452400	86600000	62500000	4739000	8185000	57400000	49500000	2993000	59800000	685500	271800	43000000	13200000	5547000	47600000	65200000	54800000	48900000	9346000	5959000	3419000	387900	5841000	9664000		532600	4170000	28400000	4227000	34400000	3491000	22200000	45000000	39800000	6956000	3823000	21400000
	GSSPSRSTR	S2(Phospho)- S3(Phospho)- T8(Phospho)	1559000	714600			2831000	719200	3815000	744800	3114000	2577000	459000	12800000	737200		33830	3870000			8148000	4946000	1924000		1715000	689500	718700	76420		2339000		443700		393800	477800		7282000		367600			2798000	37330		388900	4936000	2516
Q96PE2	VSFPSYLASPAGSR	S2(Phospho)- S5(Phospho)		354100	26700000	2596000	1759000	14200000	4417000	2297000	866600	578600	144800		29400000	27300000	41900000	2960000	315600	864800	3916000	29500000		11800000	5785000	1752000	2221000	23300000	672100	2336000	14400000	33500000	44700000	2258000	43500000	19200000	541700	12600000	21500000	11800000	28800000	28500000	35900000	11400000	29890	356400	144500	289800	1826000
	KSRKDTSR	S2(Phospho)- S7(Phospho)	14340	2596000	13190	1373000		1635000	142500	248900									143200									166400							2570000		3559000	123600								2215000	821300	29960	166300
	YSTKSNLTVHRK	S2(Phospho)- T3(Phospho)- T8(Phospho)			2194000	3259000		144700		3913000							11600000	15200000	1372000									1364000	14300000			14400000			599500		18300000			7712000	1541000	17100000			8144000			1537000	1472000
Q86XZ4	NSYSTRSR	S2(Phospho)- Y3(Phospho)- T5(Phospho)	585900					5344000	2793000					2164000	8423000	531700	4813000	647900		5559000					11700000	4135000												2115000							2156000		12300000
	RYSLGQVSK	S3(Phospho)	14200000	18700000		2488000		15700000	8952000	18000000				17200000	981100	7649000		134400	9544000								7764000	157500				12200000				1738000	991500	8475000		482200	171100					6920000	14300000
Q96S94-A0A0A0MSF3	SRSRSDSPPR	S3(Phospho)				2119		1188000	34910	681500				113100	1222000									241300	814000		14390						24390	274200	34840						57150				178400		612900
Q8N2M8-F5H0Q6-A0A0A0MQS2	SRSRSHSGDR	S3(Phospho)				2119		1188000	34910	681500				113100	1222000									241300	814000		14390						24390	274200							57150						612900
	YKSDPGPIR	S3(Phospho)		5795000				3872000			77630			87120	196400	21240		3657000			1914000								152900					199400		3673000	393900									2840000	372800
	TKSHGQEKTK	S3(Phospho)			3432000	4322000			1913000	164600				2156000					1993000	164000	2188000	2118000		1799000			3439	3190000	1947000		2415000	1686000				2691000	15970		91730		1634000	1397000				3530	199700
	GVSQMPLR	S3(Phospho)- M5(Oxidation)		1366000	17500000	114400				1299000					7646000	753300			76200		937000	8716000			1174000										7283					596500				3668000			1812000	656900	4322000
	QTSRGAMAVLAWK	S3(Phospho)- M7(Oxidation)		26600000			154400										23200000	2192000	2786000										1599000	1754000	2890000	18400000		1543000	11800000		24200000	87510	178700			12100000				222400	18690
O95294	AKSSSLNVR	S3(Phospho)- S4(Phospho)	716100	1172000	7963000	197000000	531100	1218000	73600000	140000000	19700000	2254000	4154000	158000000	6829000	2796000	483400	5917000	82000000	62100000	11600000	8362000	9674000	615300	16400000	7622000	12700000	19400000	9258000	56900000	96800000	19500000	55100000	8219000	1387000	4525000	172000000	63500000	86700000	42200000	136000000	61900000	79600000	635200	85900000	118000000	5859000	78600000	59800000
	FASKTKWMKT	S3(Phospho)- T5(Phospho)		967800								634700			6445000			1726000	4651000		5951000	192300	15870					89250		1442000	144300				49130										5293000	5344000
Q8NDL9	EGSGRVAIYK	S3(Phospho)- Y9(Phospho)	19000000				23900000	183300			615200	4468000	927400	2231000		149600							1934000	7289000												379600			537900	6647000	11100000		727800	387500	529000		12900000	1522000
	KSFSQPGLR	S4(Phospho)	2368000	275800	2968000	371100	334300		1539000											1524000		2296000					2342000	236900		272800					214700	3492000			147000				1922000
P04114	VRESDEETQIK	S4(Phospho)	479300	362700	4690000	311400	520000	73170	8186000	3935000			624300		2916000	4596000	3823000	39510	472300		297600	4393000		3886	379800	4383000	514900	752400	4242000	5676000	4466000	2129000		3312000		5235000	2384000	4180		317400		4693000	51390		3974000	4429000	3358000
P02671	NPSSAGSWNSGSSGPGSTGNR	S4(Phospho)	116100	3378000	25800000	2636000	114200	189300	4462000	3835000			1886000	15300000	138900	14200000	32200000	171300	29100000		39800000	3860000		18000000	184500	33700000	2455000	2291000	3143000	16300000	28250	2416000	1935000	21900000	28900	1532000	2565000	1214000	1314000	1158000	15700000	18600000	25230	13800000	11500000	3570000	24700000	18200000	29200000
	FARSDER	S4(Phospho)		673000	44320		134100	5593	55910	51430			425600		2263		58650	275200			318700	54160		211800	341100			51820					277700								15330	3985				378400
	FLYSKVNK	S4(Phospho)				12000000												18920	87670	229800		87340			31790			97920							111800	1600000		1133000	683600		741400	492900				165600			948700
	HTVSGGSLLMAR	S4(Phospho)						182400											15380		1750000	179700			2220000							69160									159500	592500	5414					128800
	HDNSSILELDGK	S4(Phospho)		186600		2118000	1315000						1312000				52460			1347000	1313			77830	214800	469200	112500		575700							2369000		1467000		925900	1784000	89350		952400	156400				759900
	ENFSHPYYLR	S4(Phospho)- Y7(Phospho)- Y8(Phospho)	63000000	48500000	34600000	28200000	292800		5389000	32200000	52500000		45900000			39000000	4727000	29300000	3230000		34700000	42800000		43800000	4396000	46700000	22600000	28200000	25400000	1833000	1863000	16700000	2373000	17000000		3817000	25900000				1584000	1558000	2818000		15800000	2873000	3968000	1543000
Q9BUN1	FIANSQEPEIR	S5(Phospho)	2774000	452800	3197000	2257000	2376000	285400	5482000	457500	141200	1218000	185400	3336000	367100	256500	1484000	4767000	3129000		361300	246500		233900	3635000	2164000	2543000	2213000	2764000	19680	183900	198700	2817000	3337000	4256000	28670	2924000	1896000	2936000	1547000	242300	1845000	3846	3161000	2595000	1768000	416000	2418000	1376000
Q15911	KSKLSMAK	S5(Phospho)		142500	1516000	3560000		3249000	231500	294800				194900	1741000			154600			132600	1224000			288400			167800								143500					1328000					1254000	1436000
Q8IV04-E9PSB7	KGIPSALRAR	S5(Phospho)				72200000				149700										5753000								1286000			1878000						238400				1646000	1689000		625600				1115000
	KGIPSIMR	S5(Phospho)- M7(Oxidation)	5823000		247100		186400				543600	437800	197800	197800		118100	1128000				2269000	28280			1471000		1783000		2979000	758600	841200	182600			896900	1586000		84420	1456000		7672000			164700	1550000	69930		27580
	HPHSSFPQASSPSSPSRR	S5(Phospho)- S10(Phospho)- S11(Phospho)- S13(Phospho)		88200000			5119000			48800000		4915000	1245000		6374000	79600000	4296000		62600000	239600	5549000	4415000		46800000	9846000	54700000	73000000		296300		2977000		2826000			68800000			2672000			2791000				2844000		184600
	QKQDSKEANANGSSPEPVK	S5(Phospho)- S14(Phospho)		26700			22400000		42500000	1676000				136700		117800			1695000	247200					2839000	215900	1782000	1728000			26900000	14100000		854700	11600000	31500000	1780000		6925000			17300000		8187000	129800		988100
	RSGLSAGHRDVFYYSPSGK	S5(Phospho)- S15(Phospho)- S17(Phospho)			47300000	31300000		3531000					34500000			3548000			51400000					3189000	3444000		43900000		5773000						3726000			31790		384800	3925000	38800000			36300000		1542000
Q8NBP7	HLAQASQELQ	S6(Phospho)	2246000	24530	2890000	2614000	2562000	3122000	449300	1738000	71440		1528000	139100	1280000	183800	234300	1112000	1866000	886800	2777000	1776000		192200	314600	24660	2677000	243700	2893000	21270		118400	1589000	153600	1130000	341200	2267000	272400	1780000	1248000		255500	176600	18990	2723000	1335000	1787000
Q9H568	ENPGPSYARR	S6(Phospho)	229200		488500	273500	293600		5894000	25500000	13700000	683200		16100000	278200		14200000		16700000	156600	2515	1649000			42300000		19900000	24900000	18300000		2138000	35500000	8513000	9646000	521400	16400000		13400000	1739000	36960		172100		7644000	736700	14500000	20000000		5137000
O14791	VTEPISAESGEQVER	S6(Phospho)	38300000	146000000	133000000	7926000	588500	8332000	1948000	17300000	35600000	41400000	124000000	91200000	8252000	9796000	8443000	128000000	112000000	71600000	1868000	97700000	878200	64500000	1949000	843900	6968000	114000000	77900000	5997000	59600000	58100000	12400000	72700000	156900	84700000	1981000	67400000	5985000	39700000	63100000	8463000	18000000	63300000	7998000	95100000	96700000	4739000	5166000
	VEERLSALGNVT	S6(Phospho)																		2535000							43900000			11200000	24700000												6347000			3176000		9378000
P00747-Q5TEH5-A6PVI2	QLGAGSIEECAAK	S6(Phospho)- C10(Carbamidomethyl)	5772000	11300000	1558000	531500	618300			93210	244800	2529000		5699	4346000	629900	515300		6975000	3894000	4558000	5637000		4719000	84940		662500	7259000			41630	359400		42120	556000	594500	5783000	443200						3817000	4592000		9748000
	KKSTSSSATETT	S6(Phospho)- S7(Phospho)	4363000	967800	3664000	4876000	927500	315600	1783000					8556000	6445000	1337000	22300	17770			5951000	192300			2433000	5372000	472800	89250				7566000	3675000		2194000	2441000		1998000				1982000				278100
Q96BQ1-C9J5Z5-C9IZW7	SYMSFSMKTIR	S6(Phospho)- T9(Phospho)	1633000		3874000		1446000	1971000		2896000			167200	1865000	13600000	24800000		2495000	312500						277000		19600000	2267000	2561000	1713000	2486000	2114000			22700000	3945000	3795000			9714000	1446000	2458000	29900000				376500		22700000
	YKVSTSPLTK	S6(Phospho)- T9(Phospho)		14700000	993700	24700000	6316000	98690	4312000	1141000				1212000			355200	73160			7513000	3224000		1598000	29960		519100	1445000	5124000			6122000				65360	135400	881500		342600	935400			1827000		1821000	547000	52630
	RNKKQNSQNR	S7(Phospho)	196900	828900			87570	187000							535000	58340		16320				319300														7394		438100									1119000
	YPPIVASMTADSK	S7(Phospho)	141700	2156000	244500	292700	965800		1932000	19300000			9382000	25300000	1624000	878300	11800000	12300000	98500		1593000	11200000		852700	27500000	11400000	1729000	174700	153000	1866000	925100	21800000	829700		1254000	1546000	13100000	1544000		5525000	942800	8552000	7234000	6889000	1327000	14900000	698800
P01008-Q8TCE1	ATEDEGSEQKIPEATNR	S7(Phospho)	1813000	1773000	16300000	111300	12500000	22300000	432300	13500000	4252000	2860000	1659000	12400000	12900000	11600000	974800	12800000	15200000	3827000	1572000	1146000		1424000	12200000	154900	116400	14200000	13300000	1473000	1746000	1415000	9219000	6931000	9494000	1226000	168800	87240	1534000	7294	887600	9176000	1114	5668000	7898000	112300	1528000	8728000	7214000
P01024	IPIEDGSGEVVLSR	S7(Phospho)		2834000	30000	1185000		1648000	425800				12530	114500		125200	76150	1623000	976800	84330	1482000	99420			141900	1471000	194600	116000	137000	199600		142500	893700	24450	856400	188500	1250000		72660	153600	977600	871700	1478000			1646000	23980	7673	1282000
Q15154-E7EV93	ALNMPPSLDCRYNR	S7(Phospho)- C10(Carbamidomethyl)		4662000	3538000	4762000	1196000	251500	364300			7159000	1993000	13400000	12500000	6645000	35600000			131400	1635000	1714000		24800000		31200000	361400		1974000		47300000		5747000	29500000		47500000	126500	1256000	16900000	646800	7798000	14300000				2624000	19700000		24000000
	SSLDTGSSLSTDR	S7(Phospho)- S8(Phospho)- S10(Phospho)	4947000			2425000	292800				41700000	19600000		412300	24500000	39000000	39700000				2534000					46700000			22700000				2373000			3817000		152600			1584000		287800
P01008-Q8TCE1	KATEDEGSEQKIPEATNR	S8(Phospho)	2284000	2845000	26700000	2573000	247600	31200000	29200000	2973000	6478000	6373000	2189000	176200	2527000	22400000	19300000	18600000	26400000	737000	261800	232500		19500000	2284000	23800000	225500	2585000	18900000	2229000	22300000	16700000	23300000	15000000	22760	2234000	189700	2947000	2173000	14700000	15200000	2259000	2243000	14200000	2783000	2587000	22600000	19900000	18300000
	EGIAFLYSLYR	S8(Phospho)		95470	1466000			165900	1949000					33830						1183000				574200	189700			171200									17130				238900						12480
	QAARMAASLGR	S8(Phospho)				156800		77930	3214	5462000										376500	6440000			248900	9324000				5834000			4594		42470			8578000	272900			4822000		3243000
	QPPVGGVSDMRIKVQATEQMAYCPIQCEK	S8(Phospho)- M10(Oxidation)- M20(Oxidation)- C23(Carbamidomethyl)- C27(Carbamidomethyl)		9245000	7334000		212300	445700					14280	122200	236300			5196000	4880000		851600	826500							5688000	298600	7442000	4233	8534000	1469000	9892000	55720			2682000		725500			512400			1271000		6275000
	NAGNAVRSAMKSEEQKIK	S8(Phospho)- M10(Oxidation)- S12(Phospho)		81410			52700000	49500000	64500000	45400000				3335000		50000000	2843000		55300000		74200000	58200000		2970000		5598000	56300000	57300000		6521000	79900000	63300000		32600000	43800000		68400000		2978000			31300000		31900000	388600	6468000	4639000	29100000	4641
Q16851-A0A087WYS1-E7EUC7-C9JNZ1-C9JWG0-C9JVG3-C9JQU9-C9JUW1	LNGGLGTSMGCKGPK	S8(Phospho)- M9(Oxidation)- C11(Carbamidomethyl)		944700			8281000	8679000	5248000	543700					137100	41130	1428000	4714000	5552000			81470			1284000		3713000	67800				6476000				1251000	6781000								3875000	138200	495200		52480
P46013	QKLDPAASVTGSK	S8(Phospho)- S12(Phospho)					353000		432600	7413000	967900		35160				3593000			785700	837700	69690			318700	5562		818200			668200	2454000									2949000	4799000
	AGGGIPGSSSPHPGTGSRRLK	S8(Phospho)- S9(Phospho)	439700	13200000				196000000		413000000						333000000			190000000		1340000	416000000				38300000					700000000				34800000		1118000
	LEAELETVSR	S9(Phospho)	229200		488500		293600		5894000		13700000	683200		16100000			14200000		16700000	994400	2515	1649000					19900000	24900000	18300000		2138000		8513000	9646000	521400			13400000	1739000	36960		172100		7644000	736700	14500000	20000000		5137000
Q16821	SSGIVTSGSR	S9(Phospho)		1470000		7374000	81940	1424000	877300	135500				1474000			6998		92790		1163000	74920			2197000					870000	978200								95930					845200			562300	1659000
	TFSTPNEVVK	T1(Phospho)- S3(Phospho)					1927000			1453000			892100	123300							161100	8565					1362000	2163000		872900		663800	13540		959200		24720							72850		3155000
	TAASRSGLSKAPSR	T1(Phospho)- S4(Phospho)- S6(Phospho)		27400000	26000000	31510	16580	16500000	2295000	17100000			49550		9543000	121700	15500000	1420000			1562000	121300					86440		1354000			11700000		11700000		1724000			8671000			15100000	1985000		9749000	138300	16600000	15600000	1329000
Q6PCB5	TYSHGTYRAGPMR	T1(Phospho)- Y2(Phospho)- S3(Phospho)- T6(Phospho)- Y7(Phospho)	21300000	1528000	17420	5569000	383400		1928000	13500000	3159000			2815000	8942000		774600		8849000	56400	13500000	5247000		19700000	27900000	18400000	13700000	141200	13400000	446500					5214000	11800000	99550							3599000			1855000
P02671	GSESGIFTNTK	T10(Phospho)		4134000	2445000	29800000	2218000	1442000	34700000				2160000	9625000	15400000	24900000	3746000	16400000	32100000	6940000	236200	24300000		11200000	22000000	14200000	18400000	19600000	165800	14500000	18600000	18300000	197400	156600	177300	21200000	23600000	9555000	1814000	12500000	115000	16500000	15600000	82840	13800000	194900	24600000	16400000	19000000
Q2NL82	IFQFQNFTNTR	T10(Phospho)						1739000	333900	2389000				721300					184200						32990		23380	3178000	887500				229700	193700							61750	4948000	3562000
A0A0A0MTT5	EFTVSGNILTMSVQDQDR	T10(Phospho)- M11(Oxidation)- S12(Phospho)	23600000	95200000	591000000	981000000	562000000	7542000	9573000	52500000	225600	262000000	580000000	42300000	415000000	699000000	425000000	66800000	64800000	25800000	534000000	51800000		367000000		46600000	61500000	4543000	437000000	459000000	41400000	483000000	43700000	39400000	416000000	722000000	557000000	35000000	398000000	29700000	122	446000000	47100000	31800000	38700000	51500000	65700000	283000000	41200000
P01024-M0QYC8	IHWESASLLRSEETK	T14(Phospho)			4475000	691800			52120					63620					5653000			549500					1846000	664400			473600			789900	364200	7169000	3626000						4569000
P50549-F8WEH6-C9J4P4-C9J9L1-C9J0B7	MDGFYDQQVPYMVTNSQR	T14(Phospho)		25500000			13600000		16000000	885300		8827000	77680		5893000	18500000	61660		13600000	4434000	761500	9413000			14200000	728200	19530			599300	4572000		199200	1329000		153700	9519000	7242000		786300		9550000	21200000		15400000	791600			853600
P02671	HRHPDEAAFFDTASTGK	T15(Phospho)		181000000	16000000	189000000	4877000	8186000	2122000	15300000	47100000	4754000	119000000	9248000	113000000	26600000	154000000	9434000	8194000	5146000	17200000	19700000		61730	123000000	633800	7496000	12700000	1349000	6785000	158000000	6794000	138000000	11300000	126000000	93100000	13500000	433400	547700	36300000	52800000	1774000	123000000	52300000	6884000	5493000	142000000	36400000	6344000
	VTLGLIR	T2(Phospho)	1692000		1756000		1962000	253000	1873000	89190			544200	133300	911400	814900	2123000	895800	154400		140000	168100		8191	2144000	854600	9736	1255000	844400	11350	2924000	112700	191700	95320		277800	139900	478700	6557	459800	953700		63490		75980	1763000	98270	953700	617600
	FTKDGKFR	T2(Phospho)	96250	2572000	1632000	19700000	4296	2224	2159000	1881000			141400	166100	194300	123500		18920	1447000	4259000	2258000			859400	436700	473200	77620	186500	1386000	116200	84530	37140	122400	579400	111800	3415000	1613000		11270	756800	14800	654900	668900		153400	261600	1122000	1389	1485000
	YTCHVKNPK	T2(Phospho)- C3(Carbamidomethyl)					293600		5894000	25500000	13700000			16100000	278200				16700000	156600	2515	1649000			42300000		19900000	24900000	18300000		2138000	35500000	8513000	9646000		16400000		13400000				172100		7644000	736700	14500000	20000000		5137000
P01042	ETTCSKESNEELTESCETK	T2(Phospho)- C4(Carbamidomethyl)- C16(Carbamidomethyl)	1614000	88100000	15300000	84600000	754000000	114000000	73400000	899000000	2518000	315000000	75200000	47300000	9779000	74900000	12400000	8984000	84300000	46500000	595000000	699600		6668000	94800000	83000000	818000000	791000000	89800000	91200000	684300	60000000	63300000	7459000	63000000	9774000	73400000	67400000	77300000	5860000	62000000	656000000	8958000	556000000	7419000	719000000	984000000	648000000	53800000
P01042	ETTCSKESNEELTESCETKK	T2(Phospho)- C4(Carbamidomethyl)- C16(Carbamidomethyl)	62700000	1443000	198000000	14500000	17500000	24800000	22000000	16500000	59800000	56300000	13200000	114000000	15400000	137000000	22300000	143000000	13500000	75400000	117000000	13800000		125000000	17700000	172000000	13400000	14200000	15200000	178000000	137000000	11500000	95100000	116000000	11200000	193000000	115000000	19200000	139000000	85400000	98400000	95400000	125000000	839500	114000000	130000000	16800000	12000000	1141000
	RTSEQITHRLSK	T2(Phospho)- S3(Phospho)- S11(Phospho)				2566		1293000						47820						774600	1923000	1240000			1376000		8795		1475000					1289000			251400						891600			1794000
	KTLASKTISISEEVR	T2(Phospho)- S5(Phospho)- S11(Phospho)		78300000	4577000	53200000			65900000		1638000									2767000	56600000			444700							160000000
Q9Y5N6-H3BTQ7	TTETSSAVMCLDLAASWMK	T2(Phospho)- T4(Phospho)- S5(Phospho)- C10(Carbamidomethyl)- M18(Oxidation)		63400000						6481000					51700000	618000			18800000		32600000			3555000	24590		4718000			18700000	4714000		19500000	52100000	2319000				17600000	1988000	2517000	459800			5800000	499600	19900000	45400000	4941000
	RPTALAK	T3(Phospho)	59720	155100	941800	4191000	1380000	177000	18710	58850				1147000							7754	795400								440000		1566000			381900	1414000					45830					1699000		358500
	LVTTTELK	T3(Phospho)	3731000	622500	6744000	22200000	7312000	99000000	5549000	7937000	125300	6529000	31500000	8817000	4241000	29000000	45300000	38900000	34900000	34500000	4589000	3933000		2288000	11600000	1292000	22800000	49800000	31500000	188400	23700000	512900		17600000	2584000	66400000	4569000	44700000	2863000	1919000		2625000	1819000	165600		37200000	4435000	25500000	1518000
Q6AWC2	RTTQECPVR	T3(Phospho)- C6(Carbamidomethyl)	229200								13700000	683200					14200000			156600	99670	1649000	1995000										8513000	9646000	521400			13400000	1739000					194700	736700				5137000
	KPTVTKGRSSK	T3(Phospho)- S10(Phospho)	745200	1584		246700	523300							143200							555200					2137000		383700		276400									2883000		5750000	23450			3140000	1786000	432200	3842	297800
	KPTYDGGSKITGYIVEK	T3(Phospho)- S8(Phospho)		1993000	2852000	1366000				16300000						1270000	1872000		2315000		127900	898800				9286000	16000000		13300000	1428000	732200		1516000		1217000	18500000		1815000		651600							2314000		536700
	KLFTSTGLK	T4(Phospho)	9637000	2779000	22600000	527200	25100000	3677000	26600000	242700			8511000	25990	1469000		1794000	12500000	1326000		12300000				2858000		7716000	1691000	1373000		6329000	16500000			1882000	24000000	14400000	11900000		517300	1213000	821200		5174	9278000	12900000	16800000
	KEKTKAR	T4(Phospho)				1778000																96770			113500
	NLSTLQLMGSYTEIR	T4(Phospho)- M8(Oxidation)- S10(Phospho)- T12(Phospho)		732400	1398000	1527000	4137000	44100000	49800000		1714000		1650000		2574000		13700000			232000000		21700000		347000000		277800	248700	2791000				1798000			1267000	1539000	21900000					2729000	1686000	1197000	1647000	1732000			234.9
P46013	DLYTTGRR	T4(Phospho)- T5(Phospho)	5196000	773500	762100		12500000	19200000	67700000		3564000			5364000		1727000	14100000		776900	8197000	6968000					3993000	1214000									1962000		4689000	74290	2471000			792200		53710
	KAAATSAK	T5(Phospho)	2942000	424400												1852000						1692000			9235000	1288000						3212000			1183000	3170000						726200	126700		1437000	3385000			58920
	FAGLTWW	T5(Phospho)		673000	44320		134100	5593	55910	51430			425600		2263		58650	275200			318700	54160		211800	341100			51820					277700								15330	3985				378400
	KGVDTVGESILICKNSEK	T5(Phospho)- C13(Carbamidomethyl)- S16(Phospho)		81410					64500000									4329000		3152000		1663000						57300000			79900000	63300000	41300000		43800000						94390	31300000		9152000			4639000		4641
	AFASTGLESGASGR	T5(Phospho)- S9(Phospho)- S12(Phospho)				63800000			13600000			1916000				6156000										53000000														21300000
	HVMATNTTMMGKTRQR	T5(Phospho)- T8(Phospho)- T13(Phospho)		24600000			2788000	254100	162800		1532000	11600000	1718000							1388000	9728000			1465000	1783000	44900000	1832000	481200	5437000						894700		47800000	129600				93190	29200000				2582000
	RSFPPRTNPDK	T7(Phospho)	47570					24500000		14400000	11900000		15300000	3359000				1615000	32400000	3789000	282900	1649000	3551000	17400000			2597000		237600	13800000		23000000					17800000							17200000
Q8N0S2-A0A0B4J1R9	MAGRSLTSK	T7(Phospho)		1470000	769400	7374000	81940	1424000	877300	135500				1474000			6998		92790		1163000	74920			2197000					870000	978200								95930					845200			562300	1659000
	SEGSMSTDKR	T7(Phospho)																			581900	77880				253700		465700	41770		168300	2538	41810	34230	21820		529400					38650	38560
Q9NR48	KGRKPRWTK	T8(Phospho)	1717000	1514000	1657000	22200000		3362000	41600000	16400000		3758000	3697000	152500	198200			174900	21990	2153000						13200000	1929000					25420				8574000	125600	658500	17500000							3591000	1512000
Q14289	EVGYLEFTGPPQKPPR	T8(Phospho)			865900				11500000					9149000	546500							23400000			1219000	1432000	17300000			1376000				12400000	2159000		14900000		8215000		812200		778800		1954000	82850
	HRGRNLVTMTTAPR	T8(Phospho)		2858000	174200	16900000		8132							3622000				1249000			199400				125700				852800										571400			1897000	868200	284400	8576000
Q76N89	EEPLEEEATTQSR	T9(Phospho)		8321000	26700000	2596000	1759000		9443000						468900	593700	41900000		545300	864800	65120	5584000				2811000	3587000	23300000	672100	7912000	475600	163600	163500	2258000	9381000	3521000	1376000		733300	3792000		11500000	11100000			11800000	339400	9258000	1826000
J3QRQ5	XDFLPDGSAAQAER	X1(C)- X1(Carbamidomethyl)- S8(Phospho)			2242000					1812000	19230	134100			566000	34600000	1578000		9115000	27900000	1286000			46700000			2462000			37700000	1724000	8792000		55900000		2569000				31510	428400	743400	342800	2877000				879300	644600
A0A096LPA3	XGGFLGAGQRLSRAMSR	X1(D)- S12(Phospho)- M15(Oxidation)- S16(Phospho)	1813000		16300000	111300	12000000	22300000									974800					1146000											864700								833600		1114	56580	7898000	112300
	XLPQKSHGR	X1(D)- S6(Phospho)	1394000								3229000									3595000				2971000	28000000					351600	5379000		5249000				14500000												3823000
	XLYAVLR	X1(F)- Y3(Phospho)	1531000	1177000	513400	37510	67840	173000		86490			54210	2724	671200		37570	1292	614800	1368000	46730	8852			2358000		829500	1550000	53730			532800				572700	3662000		618600		2476000	567200	632200		61120	117800	79240	67540
	XLLLAYMK	X1(F)- Y6(Phospho)				12000000												18920	87670	229800		87340			31790			97920				37140			111800	1600000		1133000	683600		741400	492900				165600			948700
	XFSSIPVSRICKSPNER	X1(G)- N-Term(Acetyl)- S3(Phospho)- S8(Phospho)- C11(Carbamidomethyl)- S13(Phospho)	23600000	95200000	591000000	981000000	562000000	7542000	9573000	52500000	225600	262000000	580000000	42300000	415000000	699000000	425000000	66800000	64800000	25800000		51800000		367000000	64100000	46600000	61500000	4543000	437000000	459000000	41400000	483000000	43700000	39400000	416000000		557000000	35000000		29700000	483000000	446000000	47100000	31800000	38700000	51500000	65700000
	XPDEDSSHDLMLLR	X1(H)- S7(Phospho)					19920		24530			518700	722200			667800									1548000	743500						77650									279900					92670
A0A0J9YY16	XTATDSDTESR	X1(M)- T2(Phospho)- S6(Phospho)- S10(Phospho)		1558000	1411000	93930	862900		1942000	12800000					2515000	579000	199200	11400000	1348000	11900000	8943000	9318000					68590	1255000	15600000	14460	8751000	13500000	1824000	15700000	861800	641600	13200000	9883000	1317000				174600	11100000	119900	7127000	6979000	595300	2478000
	XLPTIHKR	X1(S)- T4(Phospho)	4298	2400000	1629000	536100	2118000	447600	2916000	1861000				5915000	2145000	818900	81140		2191000	56290		13880			5846000		148400	2578000	1115000	83600		287300				1269000	563400				426800	1114000			95750	19400	276500
	XMELANLQPK	X1(S)- X1(Phospho)- M2(Oxidation)							5894000	25500000	1222000			16100000	278200										42300000			24900000	18300000		2138000	35500000	8513000	9646000	521400	16400000				36960						14500000	20000000
	XSPLLLASGMAR	X1(T)- N-Term(Acetyl)- S2(Phospho)- M10(Oxidation)		39800000	36800000	21700000	17400000	20000000		26200000	84460	3272000	14900000	415400	25800000	1182000	15400000	19500000	16700000	8957000	27200000	12400000		81370	8762000	16490	272800	1639000	335900	4557000	1696000	1725000	15900000	157600	24500000	122500	2672000	1719000	767300	6497000	8865000	99480	1945000	1147000	741300	374000	3312000	16900000	8230000
M0R0J1	XLSLASSASTISSLSSLSPK	X1(T)- N-Term(Acetyl)- X1(Phospho)- S18(Phospho)											4229000						1614000	162000000									1130000									46900000	2212000	5395000		1685000		36300000	8765000			97500000
A0A0J9YXA6	XPKRPQPSR	X1(T)- X1(Phospho)- S8(Phospho)	229200		488500	273500	293600		5894000	25500000	13700000	683200		16100000	278200	88590	14200000		16700000	156600	2515	1649000	1995000		42300000		19900000	24900000	18300000		2138000	35500000	8513000	9646000	521400	16400000		13400000	1739000	36960		172100		7644000	736700	14500000	20000000		5137000
	XGAVPRSIPNLAEVK	X1(W)- S7(Phospho)						12800000														1875000		8788000	1556000		15200000		185700	18100000							1398000				1443000				12300000	14900000
	XTMAAPAESLRR	X1(Y)- M3(Oxidation)- S9(Phospho)			544500		353000		432600	7413000		133400		81350			3593000			785700		69690			318700	5562	4114000	818200	47560		668200	2454000				844500	7989000				2949000	4799000		177200				344900
P0CAP1-H8Y6P7-H0YCD3	YQQLEEASASLR	Y1(Phospho)- S8(Phospho)		812200			48560	392900	413900					178400					2437000		5199000	2449000		225200	433700	2194000	3920	1736000	299500				5353000			4800000	392200										469900	2437000
Q9Y478-O43741-F5H2X8	YVTTLLYKPI	Y1(Phospho)- Y7(Phospho)		1925000	1544000	133300	6287	748700	917600	1355000				1432000	99250		6527		649400		13810				3438000	67190	9673	7796	155800			827800			1229000		1182000	599800								1549000	1831	646700
	FYSMRSSR	Y2(Phospho)- M4(Oxidation)					788600	162900	3555000							1117000		1173000		4286000							123200	27900000	7362								23000000	531900	9963	372800	371400		762400				834400
	AYGALTENVTRKYTR	Y2(Phospho)- T10(Phospho)- Y13(Phospho)		2815000		15250		17500000			1969000	19500000	577200	52900000	11800000		31800000	17000000				115200			18300000			1139000	74600000				1635000	927400			11200000		5334000	9592000	73800000	5178000			43000000		19300000
	EYTSLGALK	Y2(Phospho)- T3(Phospho)			762100		12500000	19200000	67700000		3564000		3247000	5364000	15500000	1727000	14100000	22200000	776900	8197000	6968000				2542000		1214000		66390							1962000	2658000		74290		4563000		792200		53710
	NYLAPDATAADK	Y2(Phospho)- T8(Phospho)	8920000	112900	639800		9295000		9168000	96440					621200	4854000		62180		3269000						418000	464000			344900		6319000	34560		383700	6966000		634100	337300			3637000	2861000
	DLQAYAGR	Y5(Phospho)	1423000	3428000	23820	2581000	3279000	437300	355500	326900			1186000	299800	1836000	1666000	15940	275400	2229000	1251000	142400	24460		7695	3843000	597700	1293000	227100	1635000	1387000	133600		1600000	125400	1428000	1245000	27340	227200	1396000	1367000	188400	149800	1137000	116500	166600		118300		1684000
	DWQKYETARR	Y5(Phospho)			2694000	6156000				38260			197200		2381000			1791000			28900			1419000				227700		133200	4613000		1697000	1627000		229900											2348000	164700
	RGGLRYMGK	Y6(Phospho)	14200000		27320	2488000		15700000	8952000	18000000	3218000	2391000		17200000			61190		9544000			8181000		4187000	3242000	2875000				363500	4118000	12200000	444500	426600	735700	1738000			396100	482200		4180000	498300			6920000
	QQRTTYIK	Y6(Phospho)	14200000	18700000	27320	2488000	11400000	15700000	8952000						981100		61190	134400	9544000	462000	8544000				3242000			157500				12200000	444500			1738000	991500	8475000			171100			417900			14300000
	ALLLSSYGK	Y7(Phospho)		2400000						1861000					2145000			2958000			177600								1115000				5965						98630			1114000	144600				276500	1177000
Q8TB36	RPNLETYYERVLKRK	Y8(Phospho)		49900000					156000000	25300000			951700	13300000			78900000	243800	142000			14200000	3558000	12100000	35800000		160000000	3427000	149000000					139800		6771000		87800000	1272000	5972000	6367000			59500000	7566000	1183000	4391000		15900000
	ADREVAIYSK	Y8(Phospho)- S9(Phospho)	271900	1270000		1496000				11250			119600			127900	199800	127300				141500			137600	81650			13540			76270	1354000				86120						1377000
[truncated: 13 more columns]
