# Supplementary material for: A red-fleshed apple rich in anthocyanins improves endothelial function, reduces inflammation, and modulates the immune system in hypercholesterolemic subjects: the AppleCOR study
Source: Royal Society of Chemistry journal article supplement (doi:10.1039/d3fo05114e), 2024-01-01
Supplement: d3fo05114e25.pdf [file d3fo05114e25.pdf]

**Supplemental Table 33. Pearson correlations between proteomic and phosphoproteomic variables and Interleukine 6, CRP, and their changes from baseline after each intervention**

|                                 | Log-IL-6_6w        | d_log_IL-6_6w                        | CRP_6w             | d_CRP_6w                             |
|---------------------------------|--------------------|--------------------------------------|--------------------|--------------------------------------|
| <b>Global (n=30)</b>            |                    |                                      |                    |                                      |
| IGLV2-8_6w                      | R= 0.151; P=0.426  | R= 0.337; <b>P=0.069<sup>1</sup></b> | R= -0.031; P=0.872 | R= 0.356; <b>P=0.053</b>             |
| d_ IGLV2-8_6w                   | R= 0.114; P=0.447  | R= 0.338; <b>P=0.069<sup>1</sup></b> | R= -0.250; P=0.183 | R= 0.567; <b>P=0.001<sup>1</sup></b> |
| IGLV4_69_6w                     | R= 0.005; P=0.977  | R= 0.114; P=0.547                    | R= 0.093; P=0.613  | R= 0.021; P=0.913                    |
| d_ IGLV4_69_6w                  | R= 0.209; P=0.267  | R= 0.416; <b>P=0.022<sup>1</sup></b> | R= 0.107; P=0.572  | R= 0.075; P=0.695                    |
| <sup>3</sup> ESSSHHPGIAEFPSR_6w | R=- 0.162; P=0.418 | R= -0.419; <b>P=0.029</b>            | R= 0.196; P=0.328  | R= 0.007; P=0.973                    |
| d_ ESSSHHPGIAEFPSR_6w           | R= 0.021; P=0.920  | R= -0.159; P=0.439                   | R= 0.280; P=0.166  | R= 0.144; P=0.483                    |

<sup>1</sup> Spearman's correlation. <sup>2</sup> n=9. <sup>3</sup> n=27. IGLV2-8\_6w, immunoglobulin lambda variable 2-8 at 6 weeks; d\_IGLV2-8\_6w, change in immunoglobulin lambda variable 2-8 from baseline to 6 weeks; IGLV4-69\_6w, immunoglobulin lambda variable 4-69 at 6 weeks; d\_IGLV4-69\_6w, change in immunoglobulin lambda variable 4-69 from baseline to 6 weeks. ESSSHHPGIAEFPSR\_6w, peptide ESSSHHPGIAEFPSR from fibrinogen alpha chain at 6 weeks; d\_ ESSSHHPGIAEFPSR\_6w, change in peptide ESSSHHPGIAEFPSR from fibrinogen alpha chain from baseline to 6 weeks; Log\_IL-6\_6w, Interleukine 6 (logarithm) at 6w; d\_log\_IL-6\_6w, change in IL-6 from baseline to 6 weeks. CRP-6w, C reactive protein at 6 weeks; d\_CRP\_6w, change in CRP from baseline to 6 weeks.
