# Supplementary material for: A red-fleshed apple rich in anthocyanins improves endothelial function, reduces inflammation, and modulates the immune system in hypercholesterolemic subjects: the AppleCOR study
Source: Royal Society of Chemistry journal article supplement (doi:10.1039/d3fo05114e), 2024-01-01

**Supplemental Table 4.** Increase in plasma concentration (nM ± SEM) of the main phenolic metabolites generated after the sustained intake for 6 weeks of WFA and RFA snacks, and ARO infusion.

|                                     | $\Delta$ Concentration (day 6 w – day 0) |                          |                          |
|-------------------------------------|------------------------------------------|--------------------------|--------------------------|
|                                     | WFA snack                                | RFA snack                | AI                       |
| <i>Anthocyanins</i>                 |                                          |                          |                          |
| Peonidin-3- <i>O</i> -galactoside   | n.d. <sup>1</sup>                        | 0.73 ± 0.03 <sup>2</sup> | 0.63 ± 0.02 <sup>2</sup> |
| <i>Dihydrochalcones</i>             |                                          |                          |                          |
| Phloretin-2'- <i>O</i> -glucuronide | 0.36 ± 0.34 <sup>1</sup>                 | 8.83 ± 0.37 <sup>2</sup> | n.d. <sup>1</sup>        |

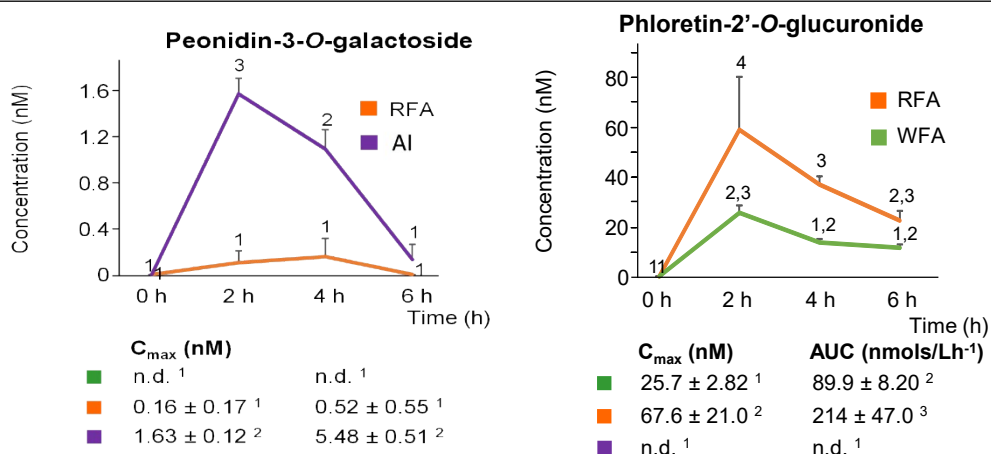

**Supplemental Table 5.** Increase in the 24-h urine excretion (µmols ± SEM) of the main phenolic metabolites generated after the sustained intake for 6 weeks of WFA and RFA snacks, and ARO infusion.

|                                     | $\Delta$ Concentration (day 6 w – day 0) |                          |                           |
|-------------------------------------|------------------------------------------|--------------------------|---------------------------|
|                                     | WFA snack                                | RFA snack                | AI                        |
| <i>Anthocyanins</i>                 |                                          |                          |                           |
| Peonidin-3- <i>O</i> -galactoside   | n.d. <sup>1</sup>                        | 4.94 ± 0.36 <sup>2</sup> | 18.4 ± 0.22 <sup>3</sup>  |
| <i>Dihydrochalcones</i>             |                                          |                          |                           |
| Phloretin-2'- <i>O</i> -glucuronide | 0.63 ± 0.03 <sup>2</sup>                 | 1.50 ± 0.03 <sup>3</sup> | -0.06 ± 0.03 <sup>1</sup> |

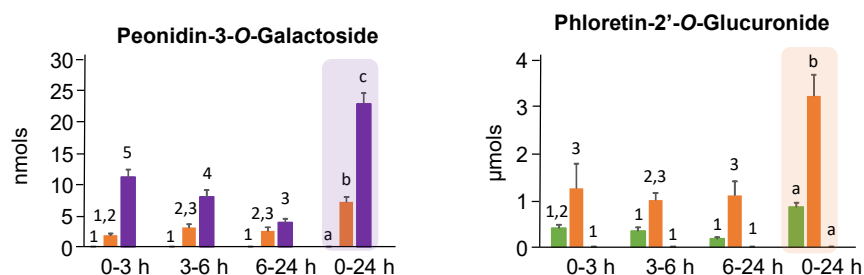

Supplement: d3fo05114e26.pdf [file d3fo05114e26.pdf]
