# Supplementary material for: A red-fleshed apple rich in anthocyanins improves endothelial function, reduces inflammation, and modulates the immune system in hypercholesterolemic subjects: the AppleCOR study
Source: Royal Society of Chemistry journal article supplement (doi:10.1039/d3fo05114e), 2024-01-01
Supplement: d3fo05114e27.pdf [file d3fo05114e27.pdf]

**Supplemental Table 6. Changes in anthropometric variables after 6 weeks of treatment**

| Variable      | Treatment     |                         |              |                         |               |                          | Changes among treatments |       |                         |       |                         |       |
|---------------|---------------|-------------------------|--------------|-------------------------|---------------|--------------------------|--------------------------|-------|-------------------------|-------|-------------------------|-------|
|               | WFA<br>(n=41) |                         | AI<br>(n=40) |                         | RFA<br>(n=43) |                          | AI vs<br>WFA             |       | RFA vs WFA              |       | RFA vs AI               |       |
|               | Post-int      | Change                  | Post-int     | Change                  | Post-int      | Change                   | Mean<br>(95%CI)          | P     | Mean<br>(95%CI)         | P     | Mean<br>(95%CI)         | P     |
| BMI, $kg/m^2$ | 24.6 ± 3.1    | 0.011<br>(-0.18;0.21)   | 25.7 ± 3.1   | 0.029<br>(-0.16; 0.22)  | 26.3 ± 3.3    | -0.032<br>(-0.23; 0.17)  | 0.018<br>(-0.26;0.29)    | 0.896 | -0.042<br>(-0.32;0.24)  | 0.764 | -0.061<br>(-0.39;0.22)  | 0.665 |
| Waist, $cm$   | 86.8 ± 10.2   | 0.196<br>(-0.74; 1.1)   | 89.6 ± 9.6   | 0.300<br>(-0.62; 1.2)   | 90.5 ± 9.8    | -0.340<br>(-1.3;0.62)    | 0.104<br>(-1.2;1.4)      | 0.876 | -0.536<br>(-1.9;0.81)   | 0.743 | -0.640<br>(-2.0;0.68)   | 0.341 |
| Waist/Height  | 0.52 ± 0.05   | 0.001<br>(-0.004; 0.01) | 0.54 ± 0.06  | 0.002<br>(-0.004; 0.01) | 0.55 ± 0.06   | -0.002<br>(-0.01; 0.004) | 0.001<br>(-0.01;0.01)    | 0.875 | -0.003<br>(-0.01;0.005) | 0.449 | -0.004<br>(-0.01;0.004) | 0.359 |

Post-int, post-treatment values. Change, change from baseline. BMI, body mass index. Data expressed as mean ± standard deviation or mean (95% Confidence Interval, CI). ANCOVA Model adjusted by sex,age, baseline .
