# Supplementary material for: A red-fleshed apple rich in anthocyanins improves endothelial function, reduces inflammation, and modulates the immune system in hypercholesterolemic subjects: the AppleCOR study
Source: Royal Society of Chemistry journal article supplement (doi:10.1039/d3fo05114e), 2024-01-01
Supplement: d3fo05114e28.pdf [file d3fo05114e28.pdf]

Supplemental Table 7b. Changes in blood pressure variables adjusted by differences in sodium consumption after 6 weeks of treatment

| Variable  | Treatment     |                                     |              |                       |               |                       | Changes among treatments |              |                      |       |                      |       |
|-----------|---------------|-------------------------------------|--------------|-----------------------|---------------|-----------------------|--------------------------|--------------|----------------------|-------|----------------------|-------|
|           | WFA<br>(n=37) |                                     | AI<br>(n=38) |                       | RFA<br>(n=32) |                       | AI vs<br>WFA             |              | RFA vs WFA           |       | RFA vs AI            |       |
|           | Post-int      | Change                              | Post-int     | Change                | Post-int      | Change                | Mean<br>(95%CI)          | P            | Mean<br>(95%CI)      | P     | Mean<br>(95%CI)      | P     |
| SBP, mmHg | 121 ± 18.6    | -4.26<br>(-8.5;0.42)                | 122 ± 15.2   | 0.305<br>(-4.3; 4.8)  | 124 ± 16.8    | -4.71<br>(-9.7; 0.30) | 4.57<br>(-2.0;11)        | 0.171        | -0.448<br>(-7.4;6.5) | 0.898 | -5.02<br>(-12;1.7)   | 0.145 |
| DBP, cm   | 71 ± 11.1     | <b>-3.55</b><br><b>(-6.5;-0.62)</b> | 73 ± 8.9     | -0.009<br>(-2.9; 2.8) | 75 ± 10.9     | -1.67<br>(-4.8;1.5)   | 3.54<br>(-0.56;7.6)      | <b>0.090</b> | 1.88<br>(-2.5;6.2)   | 0.393 | -1.66<br>(-5.9;2.6)  | 0.437 |
| PP        | 50 ± 12.3     | -0.718<br>(-3.7; 2.3)               | 49 ± 10.3    | 0.314<br>(-2.6; 3.2)  | 48 ± 11.5     | -3.04<br>(-6.3; 0.18) | 1.03<br>(-3.2;5.2)       | 0.629        | -2.32<br>(-6.8;2.1)  | 0.304 | -3.36<br>(-7.7;0.99) | 0.129 |

Post-int, post-treatment values. Change, change from baseline. SBP, systolic blood pressure; DBP; diastolic blood pressure; PP, pulse pressure. Data expressed as mean ± standard deviation or mean (95% Confidence Interval, CI. ANCOVA Model adjusted by sex, age and differences in sodium consumption.
