# Supplementary material for: A red-fleshed apple rich in anthocyanins improves endothelial function, reduces inflammation, and modulates the immune system in hypercholesterolemic subjects: the AppleCOR study
Source: Royal Society of Chemistry journal article supplement (doi:10.1039/d3fo05114e), 2024-01-01
Supplement: d3fo05114e29.pdf [file d3fo05114e29.pdf]

Supplemental Table 7. Changes in Blood and Pulse Pressure after 6 weeks of treatment

| Treatment                   |               |                                     |              |                       |               |                                      | Changes among treatments |              |                      |       |                      |       |
|-----------------------------|---------------|-------------------------------------|--------------|-----------------------|---------------|--------------------------------------|--------------------------|--------------|----------------------|-------|----------------------|-------|
| Variable                    | WFA<br>(n=41) |                                     | AI<br>(n=40) |                       | RFA<br>(n=43) |                                      | AI vs<br>WFA             |              | RFA vs WFA           |       | RFA vs AI            |       |
|                             | Post-int      | Change                              | Post-int     | Change                | Post-int      | Change                               | Mean<br>(95%CI)          | P            | Mean<br>(95%CI)      | P     | Mean<br>(95%CI)      | P     |
| Model 1. Using V1 and V4IMP |               |                                     |              |                       |               |                                      |                          |              |                      |       |                      |       |
| SBP                         | 121 ± 18.6    | -4.33<br>(-8.7;0.03)                | 122 ± 15.2   | -0.021<br>(-4.3; 4.3) | 124 ±<br>16.8 | -4.75<br>(-9.2; 0.30)                | 4.31<br>(-1.8;10)        | 0.167        | -0.416<br>(-6.7;5.8) | 0.895 | -4.72<br>(-11;1.4)   | 0.131 |
| DBP                         | 71 ± 11.1     | <b>-3.45</b><br><b>(-6.2;-0.73)</b> | 73 ± 8.9     | -0.139<br>(-2.8; 2.5) | 75 ±<br>10.9  | -1.66<br>(-4.4;1.1)                  | 3.32<br>(-0.52;7.1)      | <b>0.090</b> | 1.79<br>(-2.1;5.7)   | 0.364 | -1.52<br>(-5.4;2.3)  | 0.435 |
| PP                          | 50 ± 12.3     | -0.858<br>(-3.7; 1.9)               | 49 ± 10.3    | 0.151<br>(-2.6; 2.9)  | 48 ±<br>11.5  | <b>-2.95</b><br><b>(-5.8; -0.05)</b> | 1.01<br>(-2.9;4.9)       | 0.613        | -2.09<br>(-6.1;2.0)  | 0.309 | -3.10<br>(-7.1;0.88) | 0.126 |

Post-int, post-treatment values. Change, change from baseline. SBP, systolic blood pressure; DBP; diastolic blood pressure; PP, pulse pressure. Data expressed as mean ± standard deviation or mean (95% Confidence Interval, CI. ANCOVA Model adjusted by sex and age. Significant differences depicted in **bold** and borderline ones in *italic bold*.
