# Supplementary material for: A red-fleshed apple rich in anthocyanins improves endothelial function, reduces inflammation, and modulates the immune system in hypercholesterolemic subjects: the AppleCOR study
Source: Royal Society of Chemistry journal article supplement (doi:10.1039/d3fo05114e), 2024-01-01
Supplement: d3fo05114e30.pdf [file d3fo05114e30.pdf]

**Supplemental Table 8. Postprandial Changes in Systolic Blood Pressure at the Beginning and at the End of the study**

| Intervention    | Baseline (0h) | Change after intervention |              |              | P (trend) <sup>a,b</sup> |
|-----------------|---------------|---------------------------|--------------|--------------|--------------------------|
|                 |               | 2h                        | 4h           | 6h           |                          |
| <b>Baseline</b> |               |                           |              |              |                          |
| WFA (n=8)       | 119 (7.10)    | -4.37 (4.42)              | -6.00 (3.96) | -3.00 (2.23) | 0.231 <sup>a</sup>       |
| AI (n=9)        | 132 (5.67)    | -2.89 (3.49)              | -1.33 (3.68) | -0.22(6.80)  | 0.862 <sup>a</sup>       |
| RFA (n=12)      | 131 (3.84)    | <b>-11.2 (2.37)* †</b>    | -5.08 (5.31) | -2.75 (2.18) | <b>0.036<sup>a</sup></b> |
| <b>6 weeks</b>  |               |                           |              |              |                          |
| WFA (n=8)       | 112 (7.10)    | 0.87 (2.88)               | 2.00 (3.96)  | 8.00 (4.12)  | 0.133 <sup>b</sup>       |
| AI (n=9)        | 125 (6.82)    | -2.68 (3.89)              | 5.67(3.43)   | 3.89(4.00)   | 0.162 <sup>b</sup>       |
| RFA (n=9)       | 123 (4.07)    | -1.56 (4.14)              | 3.44 (4.59)  | 6.33 (4.01)  | 0.113 <sup>b</sup>       |

Data expressed as mean (standard error) in mmHg

Intra-treatment comparison by General Linear Model with Bonferroni correction. P for: <sup>a</sup> quadratic trend; <sup>b</sup>linear trend \* P=0.004 versus its baseline. Significant results in **bold**.

Inter-treatment comparisons by ANCOVA Model adjusted by age and sex. † P=0.094 versus Aronia
