# Supplementary material for: A red-fleshed apple rich in anthocyanins improves endothelial function, reduces inflammation, and modulates the immune system in hypercholesterolemic subjects: the AppleCOR study
Source: Royal Society of Chemistry journal article supplement (doi:10.1039/d3fo05114e), 2024-01-01
Supplement: d3fo05114e31.pdf [file d3fo05114e31.pdf]

**Supplemental Table 9. Postprandial Changes in Diastolic Blood Pressure at the Beginning and at the End of the study**

| Intervention    | Baseline (0h) | Change after intervention |              |              | P (trend) <sup>a,b</sup> |
|-----------------|---------------|---------------------------|--------------|--------------|--------------------------|
|                 |               | 2h                        | 4h           | 6h           |                          |
| <b>Baseline</b> |               |                           |              |              |                          |
| WFA (n=8)       | 72 (4.45)     | -3.87 (2.61)              | -2.25 (3.40) | -1.12(2.25)  | 0.321 <sup>a</sup>       |
| AI (n=9)        | 79 (4.00)     | -0.56 (3.30)              | 1.79 (2.67)  | 2.22 (2.90)  | 0.437 <sup>b</sup>       |
| RFA (n=12)      | 76 (2.59)     | <b>-5.92 (1.69)* †</b>    | -0.33 (1.99) | -0.83 (1.55) | <b>0.056<sup>a</sup></b> |
| <b>6 weeks</b>  |               |                           |              |              |                          |
| WFA (n=8)       | 69 (4.13)     | -3.00 (1.70)              | 0.37 (1.88)  | 5.62 (2.83)  | <b>0.044<sup>b</sup></b> |
| AI (n=9)        | 74 (6.82)     | -2.56 (1.76)              | 5.22(2.50)   | 4.44(2.16)   | <b>0.023<sup>b</sup></b> |
| RFA (n=9)       | 74 (2.51)     | -0.44 (2.17)              | 2.22 (2.87)  | 4.00 (2.59)  | 0.178 <sup>b</sup>       |

Data expressed as mean (standard error) in mmHg

Intra-treatment comparison by General Linear Model with Bonferroni correction. P for: <sup>a</sup> quadratic trend; <sup>b</sup>linear trend \* P=0.030 versus its baseline. Significant results in **bold**.

Inter-treatment comparisons by ANCOVA Model adjusted by age and sex. † P=0.101 versus Aronia
