# Supplementary material for: A red-fleshed apple rich in anthocyanins improves endothelial function, reduces inflammation, and modulates the immune system in hypercholesterolemic subjects: the AppleCOR study
Source: Royal Society of Chemistry journal article supplement (doi:10.1039/d3fo05114e), 2024-01-01
Supplement: d3fo05114e32.pdf [file d3fo05114e32.pdf]

**Supplemental Table 1.** Daily dose of the **anthocyanins** and other **phenolic compounds** (mg) in WFA and RFA snacks and in AI (anthocyanin control) by LC-MS/MS.

|                                | <b>WFA</b><br>mg/ 80g snack/day | <b>RFA</b><br>mg/ 80g snack/day | <b>AI</b><br>mg/1 L infusion/day |
|--------------------------------|---------------------------------|---------------------------------|----------------------------------|
| Cyanidin galactoside           | n.d.                            | 30.9                            | 28.6                             |
| Cyanidin arabinoside           | n.d.                            | 3.41                            | 8.84                             |
| <b>Anthocyanins</b>            | <b>0.0 (0%)</b>                 | <b>34.5 (17.5%)</b>             | <b>37.4 (37.7%)</b>              |
| <b>p-Hydroxybenzoic acid</b>   | n.d.                            | n.d.                            | 0.28                             |
| Hydroxyphenylacetic acid       | n.d.                            | n.d.                            | 1.18                             |
| Protocatechuic acid            | n.d.                            | n.d.                            | 7.7                              |
| Hydroxytyrosol                 | 0.34                            | n.d.                            | 0.18                             |
| Coumaric acid                  | n.d.                            | n.d.                            | 0.30                             |
| Coumaric acid hexoside         | 5.49                            | 1.14                            | 0.13                             |
| Coumaric acid derivate         | 0.46                            | n.d.                            | 0.35                             |
| Vanillic acid hexoside         | 0.86                            | 2.55                            | 5.77                             |
| Vanillic acid                  | n.d.                            | n.d.                            | 0.41                             |
| Vanillic acid derivate         | n.d.                            | n.d.                            | 0.08                             |
| Homogentisic acid              | 0.35                            | 0.48                            | 0.07                             |
| Gallic acid                    | n.d.                            | n.d.                            | 0.80                             |
| Gallic acid hexoside           | 1.34                            | n.d.                            | 0.74                             |
| Caffeic acid                   | n.d.                            | n.d.                            | 1.65                             |
| Caffeic acid hexoside          | n.d.                            | n.d.                            | 0.11                             |
| Ferulic acid                   | n.d.                            | n.d.                            | 0.19                             |
| Ferulic acid hexoside          | 0.29                            | 0.22                            | 0.73                             |
| Ferulic acid derivate          | 0.07                            | n.d.                            | n.d.                             |
| <b>3-O-caffeoylquinic acid</b> | n.d.                            | n.d.                            | 6.52                             |
| <b>5-O-caffeoylquinic acid</b> | 27.0                            | 69.0                            | 28.4                             |
| Caffeoylquinic acid hexoside   | n.d.                            | n.d.                            | 0.58                             |
| <b>Phenolic acids</b>          | <b>36.2 (18.4 %)</b>            | <b>73.4 (37.3%)</b>             | <b>56.1 (56.6%)</b>              |
| Catechin                       | 7.77                            | n.d.                            | n.d.                             |
| Epicatechin                    | 31.5                            | 4.93                            | 0.6                              |
| Epigallocatechin               | n.d.                            | n.d.                            | n.d.                             |
| Dimer                          | 70.4                            | 9.12                            | 0.74                             |
| Trimer                         | 10.9                            | n.d.                            | 0.32                             |
| Tetramer                       | 1.8                             | n.d.                            | n.d.                             |
| <b>Flavan-3-ols</b>            | <b>121 (61.4%)</b>              | <b>14.1 (7.16%)</b>             | <b>1.65 (1.66%)</b>              |
| Quercetin                      | 0.10                            | n.d.                            | n.d.                             |
| Dihydroquercetin               | 0.33                            | 0.10                            | 1.06                             |
| Quercetin arabinoside          | 5.92                            | 3.93                            | 0.04                             |
| Quercetin rhamnoside           | 5.72                            | 9.68                            | n.d.                             |
| Quercetin glucoside            | 5.71                            | 3.34                            | 1.03                             |
| Quercetin rutinoside           | 0.49                            | 0.16                            | 0.13                             |
| Quercetin diglucoside          | 0.09                            | n.d.                            | 0.13                             |
| Dihydrokaempferol              | 0.13                            | 0.24                            | 0.11                             |
| Kaempferol rhamnoside          | n.d.                            | n.d.                            | 0.07                             |
| Dihydrokaempferol glucoside    | n.d.                            | 0.17                            | 0.45                             |
| Kaempferol rutinoside          | 0.25                            | 0.12                            | n.d.                             |
| Myricetin glucoside            | n.d.                            | n.d.                            | 0.18                             |
| <b>Flavonols</b>               | <b>18.7 (9.49%)</b>             | <b>17.7 (8.98%)</b>             | <b>3.19 (3.22%)</b>              |
| Luteolin glucoside             | 0.17                            | 0.06                            | n.d.                             |
| Apigenin glucoside             | 0.01                            | n.d.                            | n.d.                             |

|                                    |                     |                     |                     |
|------------------------------------|---------------------|---------------------|---------------------|
| <b>Flavones</b>                    | <b>0.17 (0.09%)</b> | <b>0.06 (0.03%)</b> | <b>0 (0%)</b>       |
| Naringenin glucoside               | 0.41                | 0.55                | 0.06                |
| Eriodictyol                        | n.d.                | n.d.                | 0.11                |
| Eriodictyol hexoside               | 0.48                | 0.80                | 0.35                |
| <b>Flavanones</b>                  | <b>0.88 (0.45%)</b> | <b>1.36 (0.69%)</b> | <b>0.53 (0.53%)</b> |
| Phloretin glucoside                | 8.32                | 21.4                | 0.12                |
| Phloretin xylosyl glucoside        | 10.8                | 29.4                | 0.07                |
| Hydroxyphloretin xylosyl glucoside | 0.80                | 1.24                | n.d.                |
| <b>Dihydrochalcones</b>            | <b>19.9 (10.1%)</b> | <b>52.0 (26.4%)</b> | <b>0.20 (0.20%)</b> |
| <b>TOTAL PHENOLICS</b>             | <b>197</b>          | <b>193</b>          | <b>99.1</b>         |
| <i>Anthocyanins</i>                | 0                   | 34.5                | 37.4                |
| <i>Other phenolics</i>             | 197                 | 159                 | 61.7                |

**Supplemental Table 2.** Daily dose of **macronutrients and other phytochemicals** (mg) in in WFA and RFA snacks and in AI (anthocyanin control)

|                                                | <b>WFA<br/>80 g</b> | <b>RFA<br/>80 g</b> | <b>AI<br/>1L infusión</b> |
|------------------------------------------------|---------------------|---------------------|---------------------------|
| Energy (Kcal) <sup>a</sup>                     | 221                 | 188                 | 18.0                      |
| Protein (g) <sup>b</sup>                       | 2.10                | 2.40                | 0.00                      |
| Lipids (g) <sup>b</sup>                        | 0.66                | 0.69                | 0.00                      |
| Carbohydrats (g) <sup>b</sup>                  | 73.9                | 74.9                | 4.50                      |
| Sugars from carbohydrats (g) <sup>b</sup>      | 51.4                | 43.0                | 4.50                      |
| Total fiber (g) <sup>b</sup>                   | 11.1                | 13.2                | 0.00                      |
| Organic acids (citric, malic) (g) <sup>b</sup> | 2.2                 | 2.3                 | 0.00                      |
| Triterpenes (mg) <sup>b</sup>                  | 26.2                | 21.8                | 0.05                      |

<sup>a</sup> USDA database (Green apple variety 'Granny Smith' )

<sup>b</sup> Analizado en laboratorio
