# Supplementary material for: A red-fleshed apple rich in anthocyanins improves endothelial function, reduces inflammation, and modulates the immune system in hypercholesterolemic subjects: the AppleCOR study
Source: Royal Society of Chemistry journal article supplement (doi:10.1039/d3fo05114e), 2024-01-01
Supplement: d3fo05114e33.pdf [file d3fo05114e33.pdf]

**Supplemental Table 13. Postprandial Changes in Cholesterol at the Beginning and at the End of the study**

| Intervention    | Baseline (0h) | Change after intervention        |                                  |                                  | P (trend) <sup>a,b</sup>  |
|-----------------|---------------|----------------------------------|----------------------------------|----------------------------------|---------------------------|
|                 |               | 2h                               | 4h                               | 6h                               |                           |
| <i>Baseline</i> |               |                                  |                                  |                                  |                           |
| WFA (n=8)       | 241 (10.4)    | 0.12 (4.38)                      | 3.50 (4.78)                      | 6.37 (6.30)                      | 0.302 <sup>b</sup>        |
| AI (n=9)        | 207 (4.91)    | -7.22 (6.02)                     | <b>-9.67 (3.95)</b> <sup>†</sup> | <b>-5.44 (4.50)</b> <sup>‡</sup> | 0.102 <sup>a</sup>        |
| RFA (n=12)      | 213 (7.73)    | 0.08 (2.04)                      | 2.25 (2.32)                      | 2.92 (3.05)                      | 0.300 <sup>b</sup>        |
| <i>6 weeks</i>  |               |                                  |                                  |                                  |                           |
| WFA (n=8)       | 236 (8.80)    | -2.50 (1.63)                     | 3.50 (2.82)                      | 5.50 (3.52)                      | <b>0.094</b> <sup>b</sup> |
| AI (n=9)        | 200 (8.02)    | <b>-6.56 (2.43)</b> <sup>†</sup> | <b>-6.56(3.69)</b> <sup>†</sup>  | <b>-3.22(1.84)</b> <sup>†</sup>  | 0.109 <sup>a</sup>        |
| RFA (n=9)       | 212 (8.37)    | 5.00 (1.81)                      | 8.33 (3.12)                      | 8.56 (3.58)                      | <b>0.030</b> <sup>b</sup> |

Data expressed as mean (standard error) in mmHg

Intra-treatment comparison by General Linear Model with Bonferroni correction. P for: <sup>a</sup> quadratic trend; <sup>b</sup> linear trend. No differences were observed

Inter-treatment comparisons by ANCOVA Model adjusted by age and sex. <sup>†</sup>  $P < 0.05$ , <sup>‡</sup>  $P < 0.1$ , versus White and Red Apple treatments. Significant results in **bold**.

**Supplemental Table 14. Postprandial Changes in LDL-cholesterol at the Beginning and at the End of the study**

| Intervention    | Baseline (0h) | Change after intervention         |                                  |                                  | P (trend) <sup>a,b</sup>  |
|-----------------|---------------|-----------------------------------|----------------------------------|----------------------------------|---------------------------|
|                 |               | 2h                                | 4h                               | 6h                               |                           |
| <i>Baseline</i> |               |                                   |                                  |                                  |                           |
| WFA (n=8)       | 160 (6.80)    | -0.50 (3.22)                      | -0.37 (3.77)                     | 3.00 (4.67)                      | 0.308 <sup>a</sup>        |
| AI (n=9)        | 129 (5.15)    | -4.00 (5.13)                      | <b>-7.11 (3.59)</b> <sup>‡</sup> | <b>-4.89 (3.56)</b> <sup>¥</sup> | 0.133 <sup>b</sup>        |
| RFA (n=12)      | 142 (6.28)    | 2.83 (3.42)                       | -2.58 (1.77)                     | -2.50 (2.14)                     | 0.177 <sup>b</sup>        |
| <i>6 weeks</i>  |               |                                   |                                  |                                  |                           |
| WFA (n=8)       | 151 (6.42)    | <b>-6.62 (1.68)</b> <sup>*¶</sup> | -5.62 (2.67)                     | -2.62 (3.93)                     | <b>0.003</b> <sup>a</sup> |
| AI (n=9)        | 124 (6.20)    | -4.67 (2.46)                      | -6.33 (2.55)                     | -4.33(1.58)                      | <b>0.018</b> <sup>b</sup> |
| RFA (n=9)       | 139 (5.90)    | 0.67 (1.67)                       | 0.22 (3.37)                      | 0.78 (3.62)                      | 0.880 <sup>b</sup>        |

Data expressed as mean (standard error) in mmHg. Significant results in **bold**.

Intra-treatment comparison by General Linear Model with Bonferroni correction. P for: <sup>a</sup> quadratic trend; <sup>b</sup>linear trend \* P=0.033 versus its baseline.

Inter-treatment comparisons by ANCOVA Model adjusted by age and sex. <sup>‡</sup>P<0.1, versus White and Red Apple treatments; <sup>¥</sup>P=0.050 versus White Apple treatment; <sup>¶</sup>P<0.05 versus Red Apple treatment.

**Supplemental Table 15. Postprandial Changes in HDL-cholesterol at the Beginning and at the End of the study**

| Intervention    | Baseline (0h) | Change after intervention        |              |              | P (trend) <sup>a,b</sup> |
|-----------------|---------------|----------------------------------|--------------|--------------|--------------------------|
|                 |               | 2h                               | 4h           | 6h           |                          |
| <i>Baseline</i> |               |                                  |              |              |                          |
| WFA (n=8)       | 55.7 (3.69)   | -0.50 (1.03)                     | 0.00 (0.87)  | -1.00 (1.39) | 0.549 <sup>b</sup>       |
| AI (n=9)        | 57.7 (5.23)   | -2.67 (0.96)                     | -1.89 (1.24) | -0.89 (1.12) | <b>0.013<sup>a</sup></b> |
| RFA (n=12)      | 50.1 (2.87)   | -3.50 (3.79)                     | -0.33 (0.57) | 0.17 (0.89)  | 0.325 <sup>b</sup>       |
| <i>6 weeks</i>  |               |                                  |              |              |                          |
| WFA (n=8)       | 60.1 (4.11)   | -0.25 (0.86)                     | -0.37 (0.88) | -0.50 (0.87) | 0.539 <sup>b</sup>       |
| AI (n=9)        | 58.7 (4.84)   | <b>-2.33 (0.74)<sup>*‡</sup></b> | -1.44 (0.96) | -0.56(0.96)  | <b>0.008<sup>b</sup></b> |
| RFA (n=9)       | 48.1 (3.31)   | 1.33 (0.47)                      | 0.78 (0.72)  | 0.56 (0.99)  | 0.111 <sup>a</sup>       |

Data expressed as mean (standard error) in mmHg. Significant results in **bold**.

Intra-treatment comparison by General Linear Model with Bonferroni correction. P for: <sup>a</sup> quadratic trend; <sup>b</sup>linear trend \* P<0.1 versus its baseline.

Inter-treatment comparisons by ANCOVA Model adjusted by age and sex. <sup>‡</sup>P<0.1 versus White Apple treatment; <sup>¶</sup>P<0.05 versus Red Apple treatment.

**Supplemental Table 16. Postprandial Changes in VLDL-cholesterol at the Beginning and at the End of the study**

| Intervention    | Baseline (0h) | Change after intervention       |                                 |                                | P (trend) <sup>a,b</sup> |
|-----------------|---------------|---------------------------------|---------------------------------|--------------------------------|--------------------------|
|                 |               | 2h                              | 4h                              | 6h                             |                          |
| <i>Baseline</i> |               |                                 |                                 |                                |                          |
| WFA (n=8)       | 26.1 (4.92)   | 1.12 (1.50)                     | 3.87 (1.47)                     | 4.37 (2.54)                    | <b>0.087<sup>b</sup></b> |
| AI (n=9)        | 20.4 (2.40)   | -0.56 (1.34)                    | <b>-0.67 (1.70)<sup>‡</sup></b> | 0.33 (1.35)                    | 0.469 <sup>a</sup>       |
| RFA (n=12)      | 21.7 (2.70)   | 0.75 (0.73)                     | <b>5.16 (0.86)<sup>*</sup></b>  | <b>5.25 (1.76)<sup>†</sup></b> | <b>0.003<sup>b</sup></b> |
| <i>6 weeks</i>  |               |                                 |                                 |                                |                          |
| WFA (n=8)       | 25.1 (6.58)   | <b>4.37 (0.98)<sup>*</sup></b>  | <b>9.50 (2.49)<sup>*</sup></b>  | <b>8.62 (1.96)<sup>*</sup></b> | <b>0.004<sup>b</sup></b> |
| AI (n=9)        | 17.1 (2.01)   | <b>0.44 (1.00)<sup>¥≠</sup></b> | <b>1.22 (0.94)<sup>‡</sup></b>  | <b>1.67 (0.73)<sup>‡</sup></b> | <b>0.051<sup>b</sup></b> |
| RFA (n=9)       | 24.3 (4.00)   | <b>3.00 (0.97)<sup>†</sup></b>  | <b>7.33 (1.34)<sup>*</sup></b>  | <b>7.22 (1.84)<sup>*</sup></b> | <b>0.003<sup>b</sup></b> |

Data expressed as mean (standard error) in mmHg. Significant results in **bold**.

Intra-treatment comparison by General Linear Model with Bonferroni correction. P for: <sup>a</sup> quadratic trend; <sup>b</sup> linear trend \* P<0.05, <sup>†</sup>P<0.1 versus its baseline.

Inter-treatment comparisons by ANCOVA Model adjusted by age and sex. <sup>‡</sup>P<0.05 versus White and Red Apple treatments; <sup>¥</sup>P<0.01 versus White Apple treatment; <sup>¶</sup>P<0.05, <sup>≠</sup>P<0.1 versus Red Apple treatment.

**Supplemental Table 17. Postprandial Changes in Total Cholesterol/ HDL ratio at the Beginning and at the End of the study**

| Intervention    | Baseline (0h) | Change after intervention |                       |              | P (trend) <sup>a,b</sup>  |
|-----------------|---------------|---------------------------|-----------------------|--------------|---------------------------|
|                 |               | 2h                        | 4h                    | 6h           |                           |
| <i>Baseline</i> |               |                           |                       |              |                           |
| WFA (n=8)       | 4.48 (0.40)   | 0.04 (0.06)               | 0.07 (0.07)           | 0.19 (0.16)  | 0.273 <sup>b</sup>        |
| AI (n=9)        | 3.88 (0.43)   | 0.07 (0.16)               | <b>-0.09 (0.05)</b> ‡ | -0.05 (0.04) | 0.223 <sup>b</sup>        |
| RFA (n=12)      | 4.43 (0.33)   | 2.71 (2.71)               | 0.06 (0.03)           | 0.54 (0.10)  | 0.337 <sup>a</sup>        |
| <i>6 weeks</i>  |               |                           |                       |              |                           |
| WFA (n=8)       | 4.11 (0.42)   | -0.02 (0.04)              | 0.10 (0.08)           | 0.13 (0.07)  | <b>0.069</b> <sup>b</sup> |
| AI (n=9)        | 3.60 (0.32)   | 0.04 (0.06)               | 0.01 (0.06)           | 0.04 (0.08)  | 0.745 <sup>b</sup>        |
| RFA (n=9)       | 4.57 (0.40)   | -0.04 (0.05)              | 0.08 (0.05)           | 7.22 (1.84)  | <b>0.078</b> <sup>b</sup> |

Data expressed as mean (standard error) in mmHg. Significant results in **bold** and borderline ones in *italic bold*.

Intra-treatment comparison by General Linear Model with Bonferroni correction. P for: <sup>a</sup> quadratic trend; <sup>b</sup> linear trend. No differences were observed

Inter-treatment comparisons by ANCOVA Model adjusted by age and sex. ‡ P<0.05 versus White and Red Apple treatments

**Supplemental Table 18. Postprandial Changes in LDL Cholesterol/ HDL ratio at the Beginning and at the End of the study**

| Intervention    | Baseline (0h) | Change after intervention |               |                                         | P (trend) <sup>a,b</sup>         |
|-----------------|---------------|---------------------------|---------------|-----------------------------------------|----------------------------------|
|                 |               | 2h                        | 4h            | 6h                                      |                                  |
| <i>Baseline</i> |               |                           |               |                                         |                                  |
| WFA (n=8)       | 2.96 (0.25)   | 0.02 (0.04)               | -0.003 (0.05) | 0.11 (0.11)                             | 0.236 <sup>a</sup>               |
| AI (n=9)        | 2.46 (0.33)   | 0.07 (0.14)               | -0.08 (0.05)  | <b><i>-0.06 (0.04)</i></b> <sup>‡</sup> | <b><i>0.075</i></b> <sup>b</sup> |
| RFA (n=12)      | 2.95 (0.24)   | 2.47 (2.49)               | -0.05 (0.04)  | -0.05 (0.08)                            | 0.306 <sup>b</sup>               |
| <i>6 weeks</i>  |               |                           |               |                                         |                                  |
| WFA (n=8)       | 2.62 (0.24)   | -0.09 (0.04)              | -0.06 (0.06)  | -0.01 (0.07)                            | <b>0.010</b> <sup>a</sup>        |
| AI (n=9)        | 2.27 (0.25)   | 0.004 (0.05)              | -0.04 (0.03)  | -0.01 (0.05)                            | 0.682 <sup>b</sup>               |
| RFA (n=9)       | 3.01 (0.27)   | -0.09 (0.05)              | -0.07 (0.05)  | -0.05 (0.05)                            | 0.140 <sup>a</sup>               |

Data expressed as mean (standard error) in mmHg. Significant results in **bold** and borderline ones in *italic bold*.

Intra-treatment comparison by General Linear Model with Bonferroni correction. P for: <sup>a</sup> quadratic trend; <sup>b</sup> linear trend. No differences were observed

Inter-treatment comparisons by ANCOVA Model adjusted by age and sex. <sup>‡</sup>P<0.1 versus White Apple treatment

**Supplemental Table 19. Postprandial Changes in Triglycerides (log) at the Beginning and at the End of the study**

| Intervention    | Baseline (0h) | Change after intervention      |                                 |                                | P (trend) <sup>a,b</sup> |
|-----------------|---------------|--------------------------------|---------------------------------|--------------------------------|--------------------------|
|                 |               | 2h                             | 4h                              | 6h                             |                          |
| <i>Baseline</i> |               |                                |                                 |                                |                          |
| WFA (n=8)       | 130 (24.0)    | 6.00 (7.36)                    | 20.0 (7.60)                     | 22.9 (12.8)                    | <b>0.081<sup>b</sup></b> |
| AI (n=9)        | 102 (11.9)    | -2.33 (6.87)                   | <b>-3.11 (8.61)<sup>‡</sup></b> | <b>1.78 (6.72)<sup>‡</sup></b> | 0.494 <sup>a</sup>       |
| RFA (n=12)      | 109 (13.4)    | 2.58 (3.66)                    | <b>25.7 (4.44)<sup>†</sup></b>  | 26.3 (8.45)                    | <b>0.002<sup>b</sup></b> |
| <i>6 weeks</i>  |               |                                |                                 |                                |                          |
| WFA (n=8)       | 127 (33.1)    | <b>20.4 (4.99)<sup>*</sup></b> | <b>47.0 (12.5)<sup>*</sup></b>  | <b>42.1 (9.73)<sup>*</sup></b> | <b>0.004<sup>b</sup></b> |
| AI (n=9)        | 84.3 (10.2)   | <b>3.33 (4.72)<sup>‡</sup></b> | <b>6.89 (4.43)<sup>‡</sup></b>  | <b>9.44 (3.41)<sup>‡</sup></b> | <b>0.029<sup>b</sup></b> |
| RFA (n=9)       | 122 (20.1)    | 14.0 (4.73)                    | <b>36.5 (6.75)<sup>†</sup></b>  | <b>35.3 (9.11)<sup>*</sup></b> | <b>0.003<sup>b</sup></b> |

Data expressed as mean (standard error) in mmHg. Significant results in **bold** and borderline ones in *italic bold*.

Intra-treatment comparison by General Linear Model with Bonferroni correction. P for: <sup>a</sup> quadratic trend; <sup>b</sup> linear trend. <sup>\*</sup> P<0.05, <sup>†</sup>P<0.01 versus its baseline.

Inter-treatment comparisons by ANCOVA Model adjusted by age and sex. <sup>‡</sup> P<0.05 versus White and Red Apple treatments; <sup>‡</sup>P<0.01 versus White Apple treatment; <sup>†</sup>P<0.05, <sup>‡</sup> P<0.1 versus Red Apple treatment.
