# Supplementary figures and images for: A red-fleshed apple rich in anthocyanins improves endothelial function, reduces inflammation, and modulates the immune system in hypercholesterolemic subjects: the AppleCOR study
Source: Royal Society of Chemistry journal article supplement (doi:10.1039/d3fo05114e), 2024-01-01

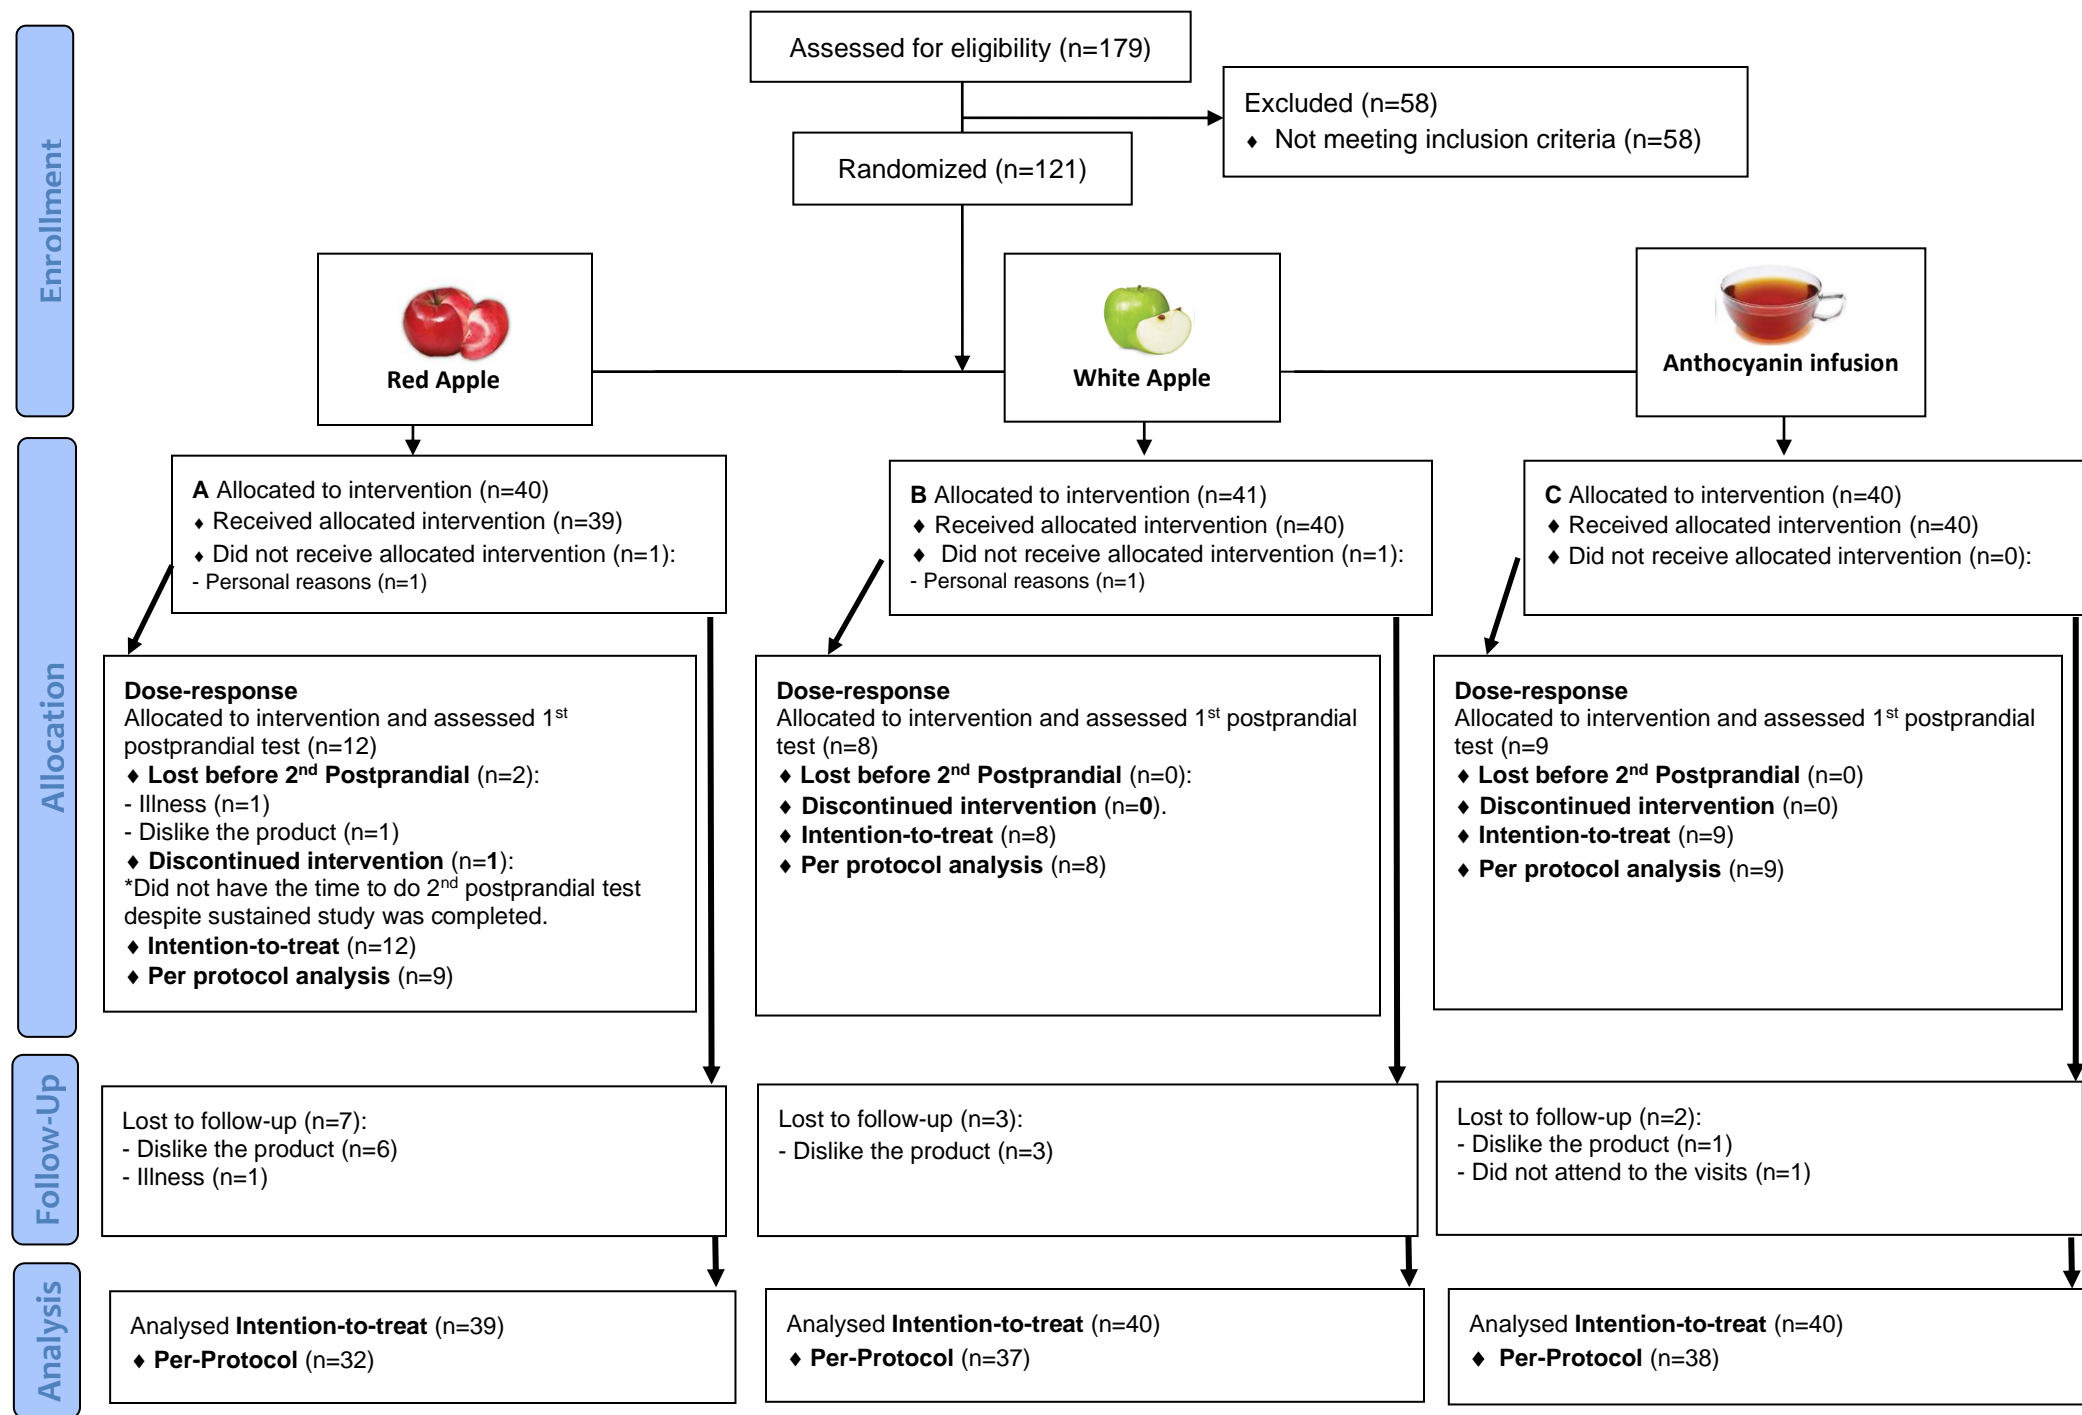

Supplement: d3fo05114e10.pdf [file d3fo05114e10.pdf]

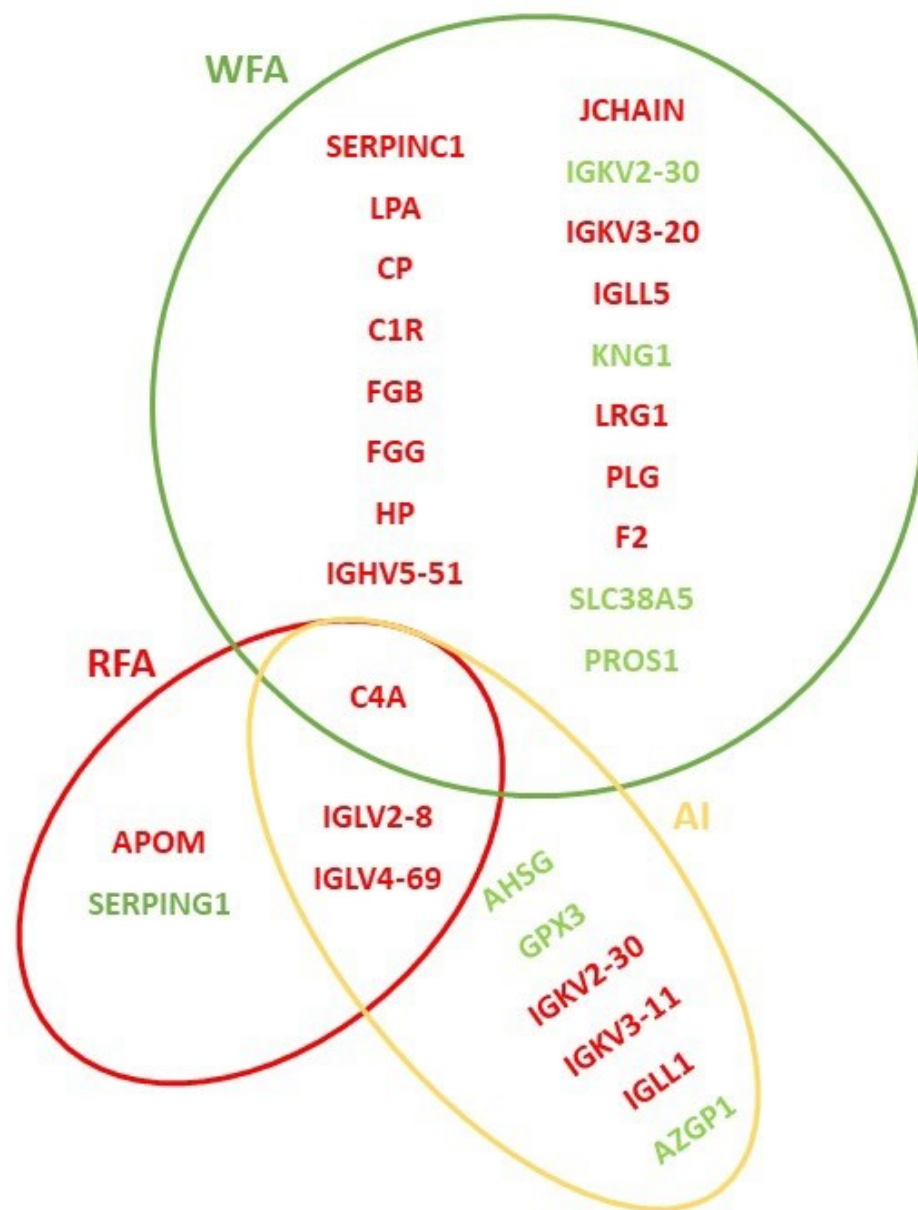

Supplement: d3fo05114e2.pdf [file d3fo05114e2.pdf]

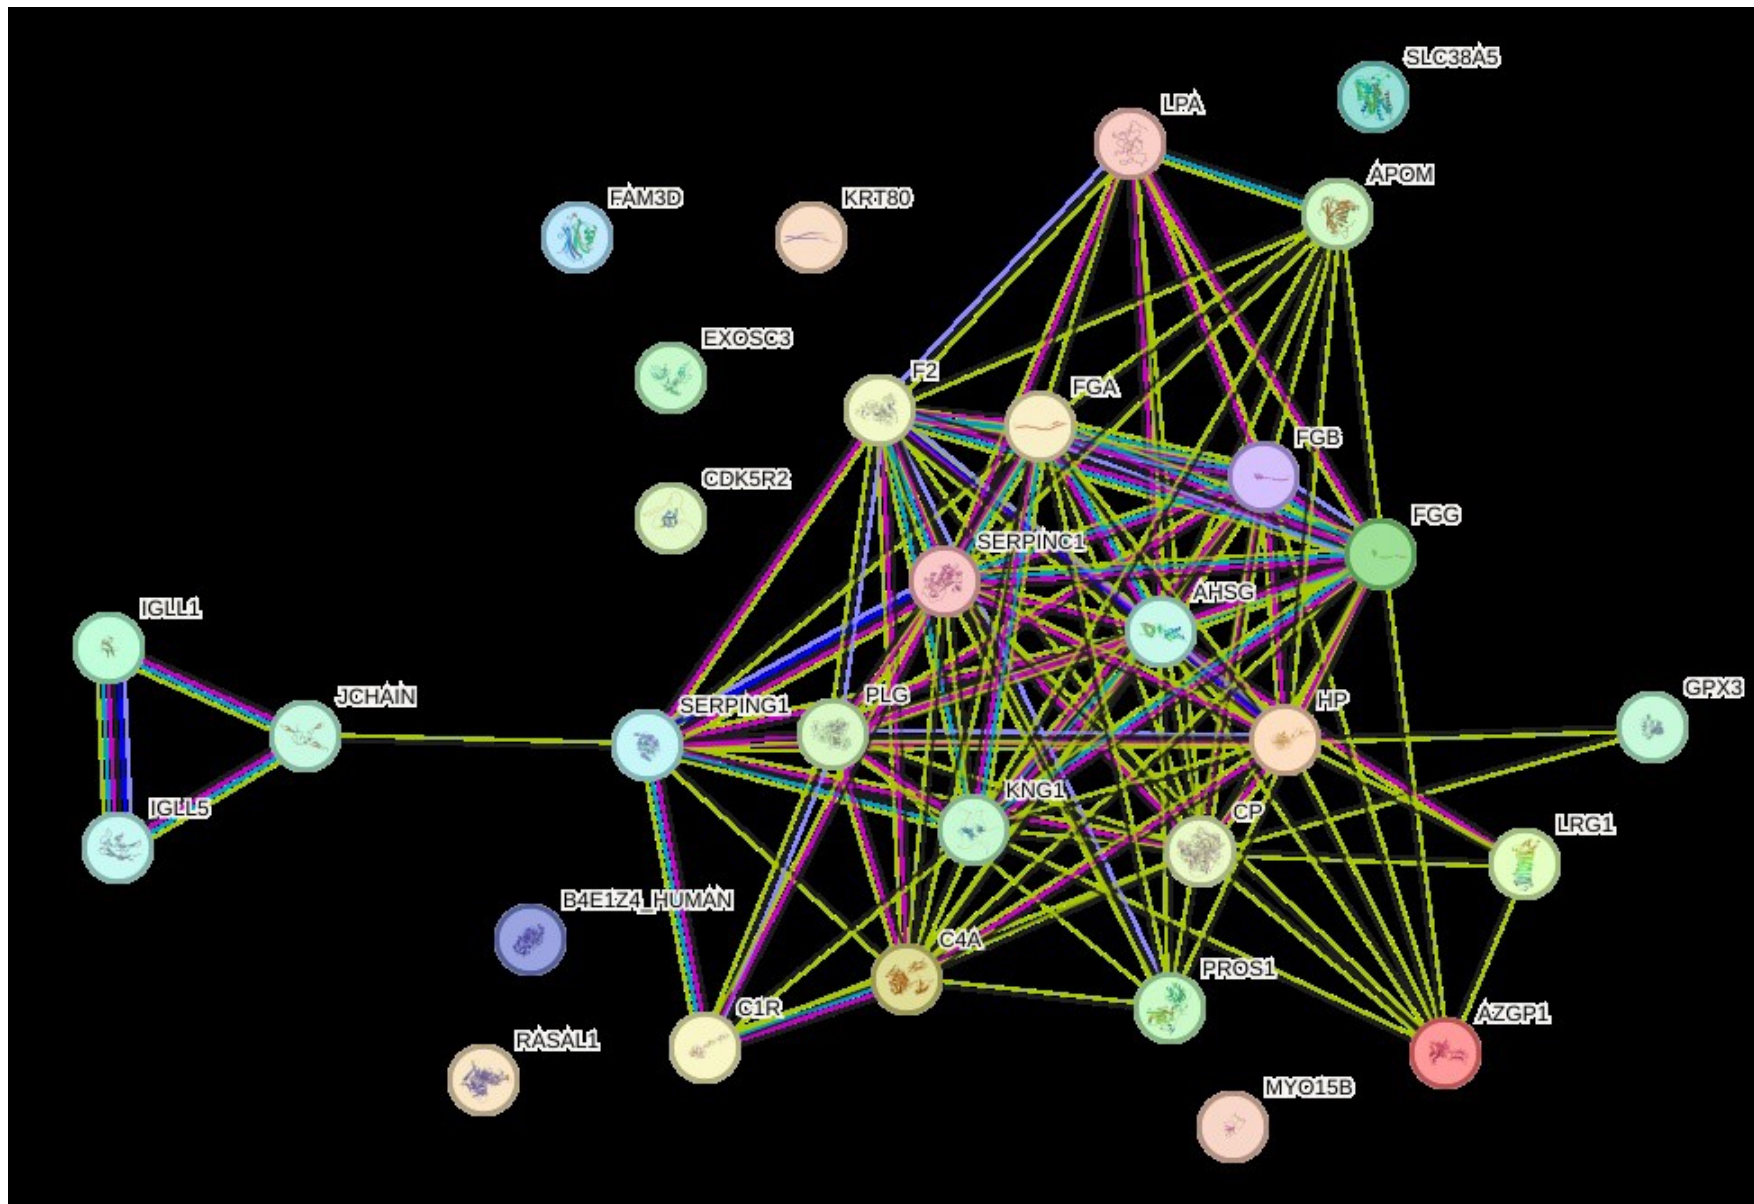

Supplement: d3fo05114e3.pdf [file d3fo05114e3.pdf]

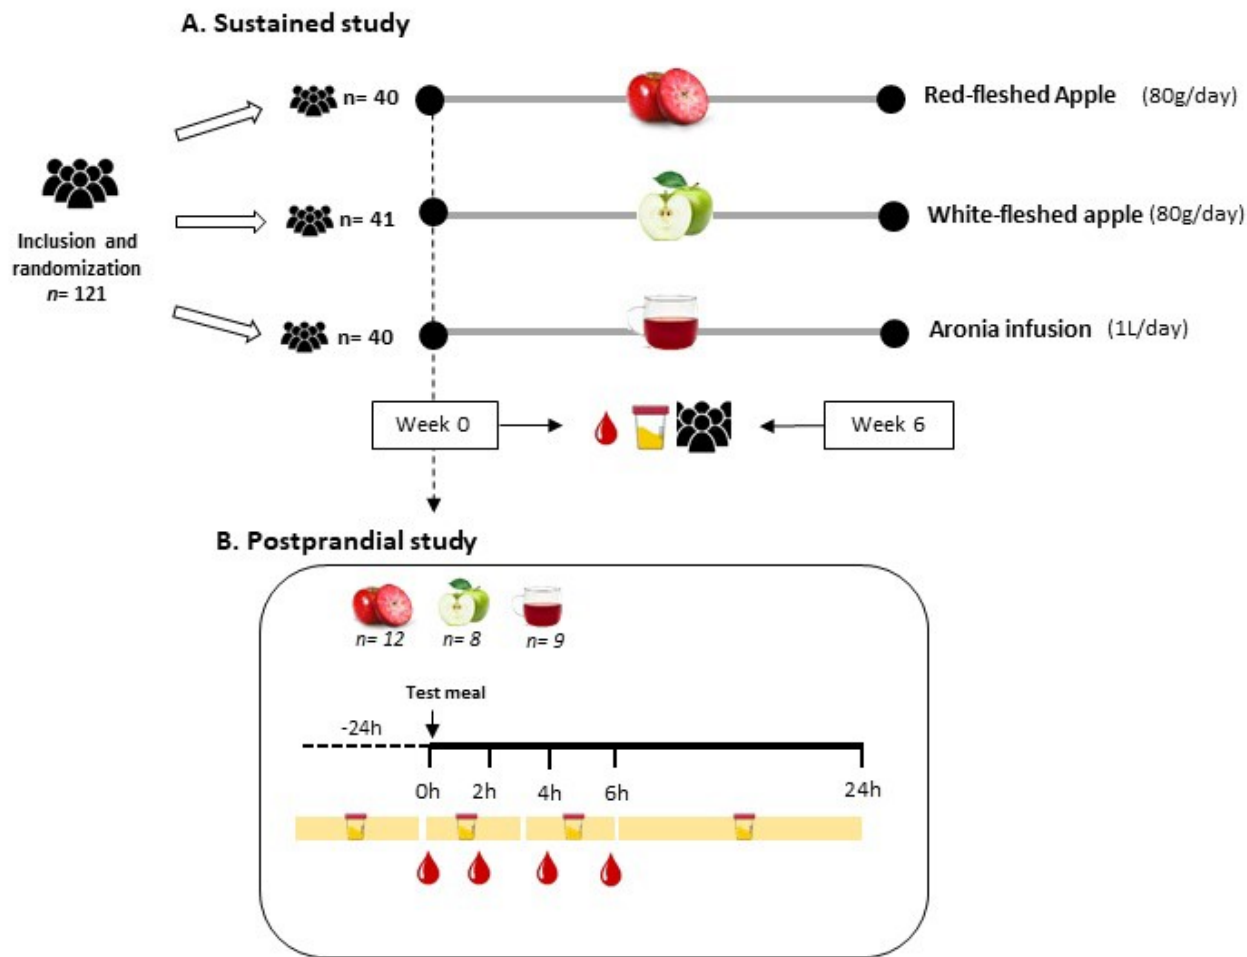

Supplemental Figure 1

Supplement: d3fo05114e8.pdf [file d3fo05114e8.pdf]
